# Supplementary material for: Life at the Top: Extensive Green Roof Plant Species and Their Traits for Urban Use
Source: MDPI journal article supplement (doi:10.3390/plants14050735), 2025-02-27
Supplement: s1 [file s1]

## Sheet: General Species
Supplementary Material S3 - Plant names and traits used in the analyses
SPECIES NAME and TRAITS	Leaf Area	Leaf phenology	Leaf shape	Glabrous/pilous	Succulent/silky/others	Life form/habit	Maximum plant longevity	Metamorphoses for storage	Metamorphoses for vegetative dispersion	Species reproduction	Photosynthetic Pathway	Flower pollinator	Compatibility	Pollinator reward	Flowering period (South Hemisphere)	Shoot growth	Shoot form	Plant height	OBS1		Obs2
Sedum spurium	0,75-6cm²		Broa/full/simple		Succulent	Chamaephyte	Indiferent	Succulent							July-august			10-20cm	Fibrous root		Contains essential oils, flavonoids, and
Sedum album	4-500mm²		Broa/full/simple	Short trichomes (invisible to the naked eye), glabrous, or sparsely distributed trichomes	Succulent	Chamaephyte	Indiferent	Succulent			C3/CAM			Nectar	June -july	Ascending to prostrate/decumbent	Cespitose, mat forming	8-20cm
Sedum acre	2-32 mm²	Often deciduous	Broa/full/simple	Glabrous	Succulent	Chamaephyte	Indiferent	Succulent			C3/CAM			Nectar	June -july	Ascending to prostrate/decumbent	Mat forming	3-15cm
Sedum rupestre	5-30mm²		Broa/full/simple	Glabrous		Chamaephyte	Indiferent	Succulent							December-march	Prostrate	Mat forming	até 30cm	Fibrous root
Sedum kamtschaticum	1,25-21cm²	Winter deciduous	Broa/full/simple			Chamaephyte	Indiferent	Succulent			C3/CAM			Nectar	June -july	Ascending		15-40cm
Sedum sexangulare	2,4-12mm²		Broa/full/simple	Glabrous	Succulent	Chamaephyte	Indiferent	Succulent	Stolon		CAM			Nectar	June -july	Ascending	Cespitose, mat forming,
Sedum lineare	0,4-0,5cm²		Broa/full/simple	Glabrous		Chamaephyte	Indiferent	Succulent		Seed	CAM			Nectar	April-may	erect, ascending or decumbent	Mat forming	10-20cm			Medicinal use
Achillea millefolium	4-60cm²		Pinnate	Glabrous to sparsely or fully pilous	Silky		Indiferent		Stolon and rhizome		C3				July-september or year round	Erect		20-100cm	Long rhizomes		Aromatic medicinal plant or ornamental
Allium schoenoprasum	100-300mm²	Evergreen	Broa/full/simple	Glabrous	Silky		Indiferent	Bulb and Rhizome		Seed/vegetative	C3		Self-seeds	Nectar	July-september		Grouped bulb	61cm
Festuca ovina	15-150 mm²		Broa/full/simple	Glabrous	Silky	Hemicryptophyte	Indiferent	Rhizome		Seed/vegetative	C3	Wind	Self-incompatible		June-september		Densely tufted	15-60cm	Hermaphroditic flowers
Festuca rubra	24-1200mm²		Broa/full/simple	Glabrous	Silky	Hemicryptophyte	Indiferent		Rhizome	Vegetative	C3					Erect	Loosely tufted	15-90cm	Allelopathic, endophytic fungus host
Talinum calycinum			Broa/full/simple	Glabrous	Succulent		Indiferent	Succulent and rhizome		Seed	C3/CAM				May-setember	Ascending or erect		7-20cm	Fibrous root
Dianthus carthusianorum			Broa/full/simple	Glabrous		Hemicryptophyte	Indiferent			Seed		Insects		Nectar/pollen	June-october	erect	Cespitose		Varieties with different tolerance to heavy metals (Zn, Pb, Cd)
Sedum hybridum	1,5-6cm²		Broa/full/simple		Succulent		Indiferent	Succulent and rhizome		Seed/vegetative	C3/CAM	Insects		Nectar	June-July	Prostrate	Mat forming	8-15cm
Trifolium arvense			Palmate	Pilous		Therophyte	Anual/bienal			Seed	C3	Wind, water	Selffertile		May-september	Erect			Symbiosis with Rhizobium leguminosarum
Trifolium repens	48-100mm²		Palmate	Glabrous		Therophyte	Indiferent		Stolon	Seed	C3				May-october (Summer)	Ascending to prostrate/decumbent		10-30cm
Cynodon dactylon	1-48 mm²		Broa/full/simple	Glabrous or finely pilous		Geophyte	Indiferent	Rhizome	stolon	Seed/vegetative	C4				Most of the year	Ascending to prostrate/decumbent		5-40cm	Morphological plasticity		Medicinal properties
Allium cernuum	1-15cm²	Evergreen	Broa/full/simple					Bulb and Rhizome		Seed/vegetative	C3	Insects		Pollen	July-september		Grouped bulb	20cm
Erigeron canadenses	0,8-15cm²		Broa/full/simple	Glabrous to sparsely pilous		Therophyte	Anual			Seed	C3	Insects	Self compatible	Pollen	December-march	Erect		10-200cm	Essential oil with antimicotic activity, folk medicine, seeds not dormant
Sedum mexicanum	9,5-60 mm²		Broa/full/simple	Glabrous	Succulent	Chamaephyte	Indiferent	Succulent		Seed	C3/CAM			Nectar		Ascending to prostrate/decumbent	Tufted		Roots at stem nodes
Poa pratensis L.			Broa/full/simple	Glabrous	Silky	Hemicryptophyte			Rhizome	Seed/vegetative	C3		Compatible	Pollen	June-July	Erect	Tufted	10-120cm
Sedum hispanicum	4-40mm²		Broa/full/simple	Glabrous or with grandular trichomes	Succulent	Therophyte		Succulent		Seed/vegetative	CAM	Wind and gravity		Nectar	May-july	Erect or ascending	Tufted	5-20cm	Short, little developed, fibrous and thin roots
Lavandula angustifolia	90-250mm²	Evergreen	Broa/full/simple	Pilous		Chamaephyte	Indiferent			Seed/vegetative		Insects		Nectar/pollen/oil	June-August (summer)		Clumps	40-60cm	Branched fibrous root
Solidago bicolor	5,25 - 105 cm²		Broa/full/simple	Pilous		Hemicryptophyte	Indiferent			Seed	C3	Insects				Erect		20-100cm
Armeria maritima	5-45mm²		Broa/full/simple	Glabrous or with trichomes		Chamaephyte	Indiferent			Seed	C3	Insects	Cross-pollinates	Pollen	May- july (Summer)	Erect		20cm	May form adventitious roots		Salt glands on leaves tolerates high heavy metal concentrations and salt water; shade intolerant; present in metallic and non-metallic soils gareat morphological differences
Portulaca grandiflora	5-150mm²		Broa/full/simple	Pilous, sometimes glabrous	Succulent	Therophyte	Anual/Indiferent	Succulent		Seed	C4/CAM	Insects	Compatible	Pollen		Ascending or erect		15-30cm	Tuberous and fibrous root
Zoysia matrella	1-224mm²		Broa/full/simple	Glabrous			Indiferent		stolon	Seed/vegetative	C4			Pollen	july-october (summer/autumn)	Prostrate	Mat forming	20cm	Shallow underground rhizome
Schizachyrium scoparium	9-18 cm²		Broa/full/simple			Hemicryptophyte	Indiferent			Seed	C4	Wind	Compatible		April-december (sumer-winter)	erect	Tufted	50-150cm
Taraxacum campylodes	4,48-97,5cm		Broa/full/simple	Pilous		Hemicryptophyte				Seed	C3	Insects		Pollen	May-June (spring)	Without stem		15-20cm
Campanula rotundifolia	1-10 cm²	Often deciduous	Broa/full/simple	Glabrous			Indiferent	rhizome		Seed	C3	Insects		Nectar/pollen	June-september	erect, ascending or prostrate		10-40cm
		Yellow = traits or species with more than 50% missing values; excluded of the analysis

## Sheet: Temperate Species
Supplementary Table S3.1 - Plant names and traits used in the analyses
SPECIES NAME and TRAITS	Leaf Area	Leaf phenology	Leaf shape	Glabrous/pilous	Succulent/silky/others	Life form/habit	Maximum plant longevity	Metamorphoses for storage	Metamorphoses for vegetative dispersion	Species reproduction	Photosynthetic Pathway	Flower pollinator	Compatibility	Pollinator reward	Flowering period (South Hemisphere)	Shoot growth	Shoot form	Plant height	% 18 traits	% 14 traits	OBS1		Obs2
Sedum album	4-500mm²		Broad/full/simple	Short trichomes (invisible to the naked eye), glabrous, or sparsely distributed trichomes	Succulent	Chamaephyte	Indiferent	Succulent			C3/CAM			Nectar	June -july	Ascending to prostrate/decumbent	Cespitose, mat forming	8-20cm	72.2222	85.7143
Sedum acre	2-32 mm²	Often deciduous	Broad/full/simple	Glabrous	Succulent	Chamaephyte	Indiferent	Succulent			C3/CAM			Nectar	June -july	Ascending to prostrate/decumbent	Mat forming	3-15cm	77.7778	92.8571
Sedum spurium	0,75-6cm²		Broad/full/simple		Succulent	Chamaephyte	Indiferent	Succulent							July-august			10-20cm	44.4444	50	Fibrous root		Contains essential oils, flavonoids, and
Sedum rupestre	5-30mm²		Broad/full/simple	Glabrous		Chamaephyte	Indiferent	Succulent							December-march	Prostrate	Mat forming	<30cm	55.5556	64.2857	Fibrous root
Sedum sexangulare	2,4-12mm²		Broad/full/simple	Glabrous	Succulent	Chamaephyte	Indiferent	Succulent	Stolon		CAM			Nectar	June -july	Ascending	Cespitose, mat forming,		72.2222	78.5714
Sedum sediforme						Chamaephyte	Indiferent											50cm	16.6667	21.4286
Sedum kamtschaticum	1,25-21cm²	Winter deciduous	Broad/full/simple			Chamaephyte	Indiferent	Succulent			C3/CAM			Nectar	June -july	Ascending		15-40cm	61.1111	64.2857
Sedum lineare	0,4-0,5cm²		Broad/full/simple	Glabrous		Chamaephyte	Indiferent	Succulent		Seed	CAM			Nectar	April-may	erect, ascending or decumbent	Mat forming	10-20cm	72.2222	85.7143			Medicinal use
Allium schoenoprasum	100-300mm²	Evergreen	Broad/full/simple	Glabrous	Silky		Indiferent	Bulb and Rhizome		Seed/vegetative	C3		Self-seeds	Nectar	July-september		Grouped bulb	61cm	77.7778	78.5714
Festuca ovina	15-150 mm²		Broad/full/simple	Glabrous	Silky	Hemicryptophyte	Indiferent	Rhizome		Seed/vegetative	C3	Wind	Self-incompatible		June-september		Densely tufted	15-60cm	77.7778	85.7143	Hermaphroditic flowers
Festuca rubra	24-1200mm²		Broad/full/simple	Glabrous	Silky	Hemicryptophyte	Indiferent		Rhizome	Vegetative	C3					Erect	Loosely tufted	15-90cm	66.6667	78.5714	Allelopathic, endophytic fungus host
Achillea millefolium	4-60cm²		Pinnate	Glabrous to sparsely or fully pilous	Silky		Indiferent		Stolon and rhizome		C3				July-september or year round	Erect		20-100cm	55.5556	64.2857	Long rhizomes		Aromatic medicinal plant or ornamental
Sedum mexicanum	9,5-60 mm²		Broad/full/simple	Glabrous	Succulent	Chamaephyte	Indiferent	Succulent		Seed	C3/CAM			Nectar		Ascending to prostrate/decumbent	Tufted		66.6667	78.5714	Roots at stem nodes
Dianthus carthusianorum			Broad/full/simple	Glabrous		Hemicryptophyte	Indiferent			Seed		Insects		Nectar/pollen	June-october	erect	Cespitose		55.5556	71.4286	Varieties with different tolerance to heavy metals (Zn, Pb, Cd)
Trifolium arvense			Palmate	Pilous		Therophyte	Anual/bienal			Seed	C3	Wind, water	Selffertile		May-september	Erect			55.5556	64.2857	Symbiosis with Rhizobium leguminosarum
Trifolium repens	48-100mm²		Palmate	Glabrous		Therophyte	Indiferent		Stolon	Seed	C3				May-october (Summer)	Ascending to prostrate/decumbent		10-30cm	61.1111	71.4286
Thymus mongolicus			Palmate				Indiferent			Seed/vegetative	C3								22.2222	28.5714
Cynodon dactylon	1-48 mm²		Broad/full/simple	Glabrous or finely pilous		Geophyte	Indiferent	Rhizome	Stolon	Seed/vegetative	C4				Most of the year	Ascending to prostrate/decumbent		5-40cm	66.6667	71.4286	Morphological plasticity		Medicinal properties
Solidago bicolor	5,25 - 105 cm²		Broad/full/simple	Pilous		Hemicryptophyte	Indiferent			Seed	C3	Insects				Erect		20-100cm	55.5556	71.4286
Talinum calycinum			Broad/full/simple	Glabrous	Succulent		Indiferent	Succulent and rhizome		Seed	C3/CAM				May-setember	Ascending or erect		7-20cm	55.5556	64.2857	Fibrous root
Poa pratensis L.			Broad/full/simple	Glabrous	Silky	Hemicryptophyte			Rhizome	Seed/vegetative	C3		Compatible	Pollen	June-July	Erect	Tufted	10-120cm	72.2222	78.5714
Lavandula angustifolia	90-250mm²	Evergreen	Broad/full/simple	Pilous		Chamaephyte	Indiferent			Seed/vegetative		Insects		Nectar/pollen/oil	June-August (summer)		Clumps	40-60cm	66.6667	78.5714	Branched fibrous root
Taraxacum campylodes	4,48-97,5cm		Broad/full/simple	Pilous		Hemicryptophyte				Seed	C3	Insects		Pollen	May-June (spring)	Without stem		15-20cm	61.1111	78.5714
Rosmarinus officinalis	10-50mm²	Evergreen	Broad/full/simple	Glabrous to sparsely or fully pilous	Silky	Phanerophyte	Indiferent		Stolon	Seed/vegetative	C3	Insects	Compatible	Pollen	Nov (autunm)			<200cm	83.3333	85.7143	High phenotypic plasticity and genetic diversity
Danthonia spicata			Broad/full/simple		Silky	Hemicryptophyte	Indiferent			seed	C3	Wind	Compatible	Pollen	May-June (spring)	Without stem		20-60cm	66.6667	78.5714
Ophiopogon japonicus	1,5-175cm²		Broad/full/simple		Silky	Geophyte	Indiferent			Seed		Insects		Pollen	June-July(Summer)	Prostrate	Tufted	15cm	66.6667	85.7143
Erigeron canadenses	0,8-15cm²		Broad/full/simple	Glabrous to sparsely pilous		Therophyte	Anual			Seed	C3	Insects	Self compatible	Pollen	December-march	Erect		10-200cm	72.2222	85.7143	Essential oil with antimicotic activity, folk medicine, seeds not dormant
Armeria maritima	5-45mm²		Broad/full/simple	Glabrous or with trichomes		Chamaephyte	Indiferent			Seed	C3	Insects	Cross-pollinates	Pollen	May- july (Summer)	Erect		20cm	72.2222	85.7143	May form adventitious roots		Salt glands on leaves tolerates high heavy metal concentrations and salt water; shade intolerant; present in metallic and non-metallic soils gareat morphological differences
Pilosella officinarum	5-140cm²		Broad/full/simple	Pilous	Silky	Hemicryptophyte	Indiferent		Stolon and rhizome	Seed/vegetative	C3	Insects	Cross-pollinates	Nectar/pollen/oil	May-Sep (spring, summer, autunm)	Prostrate		40cm	83.3333	92.8571
Leucanthemum vulgare			Pinnate	Glabrous or with trichomes	Silky	Hemicryptophyte	Indiferent		Stolon	Seed/vegetative		Insects	Self-incompatible	Pollen	Nov (autunm)	Ascending to prostrate/decumbent		100cm	72.2222	78.5714
Sedum hybridum	1,5-6cm²		Broad/full/simple		Succulent		Indiferent	Succulent and rhizome		Seed/vegetative	C3/CAM	Insects		Nectar	June-July	Prostrate	Mat forming	8-15cm	72.2222	85.7143
Sedum hispanicum	4-40mm²		Broad/full/simple	Glabrous or with grandular trichomes	Succulent	Therophyte		Succulent		Seed/vegetative	CAM	Wind and gravity		Nectar	May-july	Erect or ascending	Tufted	5-20cm	77.7778	92.8571	Short, little developed, fibrous and thin roots
	80	16.6667	100	83.3333	60	86.6667	90	50	30	76.6667	80	50	33.3333	66.6667	90	83.3333	50	86.6667
		Yellow = traits or species with more than 50% missing values; excluded of the analysis

## Sheet: Tropical Species
Supplementary Table S3.2 - Plant names and traits used in the analyses
SPECIES NAME and TRAITS	Leaf Area	Leaf phenology	Leaf shape	Glabrous/pilous	Succulent/silky/others	Life form/habit	Maximum plant longevity	Metamorphoses for storage	Metamorphoses for vegetative dispersion	Species reproduction	Photosynthetic Pathway	Flower pollinator	Compatibility	Pollinator reward	Flowering period (South Hemisphere)	Shoot growth	Shoot form	Plant height	% 18 traits	% 15 traits	OBS1		Obs2
Sedum lineare	0,4-0,5cm²		Broad/full/simple	Glabrous		Chamaephyte	Indiferent	Succulent		Seed	CAM			Nectar	April-may	erect, ascending or decumbent	Mat forming	10-20cm	72.2222	86.6667			Medicinal use
Portulaca grandiflora	5-150mm²		Broad/full/simple	Pilous, sometimes glabrous	Succulent	Therophyte	Anual/Indiferent	Succulent		Seed	C4/CAM	Insects	Compatible	Pollen		Ascending or erect		15-30cm	77.7778	86.6667	Tuberous and fibrous root
Sedum spurium	0,75-6cm²		Broad/full/simple		Succulent	Chamaephyte	Indiferent	Succulent							July-august			10-20cm	44.4444	53.3333	Fibrous root		Contains essential oils, flavonoids, and
Sedum rupestre	5-30mm²		Broad/full/simple	Glabrous		Chamaephyte	Indiferent	Succulent							December-march	Prostrate	Mat forming	<30cm	55.5556	66.6667	Fibrous root
Sedum kamtschaticum	1,25-21cm²	Winter deciduous	Broad/full/simple			Chamaephyte	Indiferent	Succulent			C3/CAM			Nectar	June -july	Ascending		15-40cm	61.1111	66.6667
Sedum mexicanum	9,5-60 mm²		Broad/full/simple	Glabrous	Succulent	Chamaephyte	Indiferent	Succulent		Seed	C3/CAM			Nectar		Ascending to prostrate/decumbent	Tufted		66.6667	80	Roots at stem nodes
Talinum calycinum			Broad/full/simple	Glabrous	Succulent		Indiferent	Succulent and rhizome		Seed	C3/CAM				May-september	Ascending or erect		7-20cm	55.5556	66.6667	Fibrous root
Sansevieria trifasciata	100-360cm²		Broad/full/simple	Glabrous	Succulent	Hemicryptophyte	Indiferent	Succulent and rhizome	Stolon and rhizome	Seed/vegetative	CAM	Insects		Nectar and Pollen		Without stem		90cm	77.7778	86.6667
Lactuca sativa			Broad/full/simple	Glabrous	Silky	Hemicryptophyte	Anual/Bianual			Seed	C3	Insects	Incompatible	Pollen	Mar-May (spring)	Erect		40cm	72.2222	80
Phedimus aizoon	1,75-24cm²		Broad/full/simple	Glabrous	Succulent		Indiferent	Succulent		Seed	C3/CAM			Nectar	Summer	Erect	Simple	20-50cm	72.2222	86.6667	Tuberous root
Sphagneticola trilobata			Broad/full/simple	Glabrous to sparsely or fully pilous	Succulent	Therophyte	Indiferent		Stolon	Seed/vegetative		Insects		Nectar and Pollen	All year	Prostrate		30cm	66.6667	73.3333
Axonopus compressus	30-150cm²		Broad/full/simple	Glabrous	Silky	Therophyte	Indiferent	Stolon	Stolon	Seed/vegetative	C4	Insects			Summer-Autunm	Ascending	Cespitous	15cm	83.3333	93.3333
Arachis pintoi	0,6-16cm²		Broad/full/simple	Glabrous	Silky		Indiferent		Stolon	Seed/vegetative	C4	Insects and birds		Nectar and Pollen		Ascending to prostrate		30cm	66.6667	73.3333
Zoysia matrella	1-224mm²		Broad/full/simple	Glabrous			Indiferent		Stolon	Seed/vegetative	C4			Pollen	july-october (summer/autumn)	Prostrate	Mat forming	20cm	66.6667	73.3333	Shallow underground rhizome
Callisia repens	0,6-4,8cm²		Broad/full/simple	Glabrous	Succulent		Indiferent		Stolon	Seed	CAM	Wind	Compatible			Prostrate	Tufted	15cm	72.2222	73.3333
Bulbine frutescens			Broad/full/simple	Glabrous	Succulent	Geophyte	Indiferent					Insect		Nectar and Pollen	All year	Without stem		60cm	55.5556	66.6667
Callirhoe involucrata			Palmate	Pilous	Silky		Indiferent			Seed			Compatible		May-Oct (Autunm, winter and spring)	Ascending to prostrate		70cm	50	53.3333
Tradescantia spathacea	60-180cm²	Evergreen	Broad/full/simple	Glabrous	Succulent	Hemicryptophyte	Indiferent	Succulent and rhizome	Stolon	Seed/vegetative	CAM	Insects	Compatible	Pollen	Spring and Summer	Ascending to erect	Tufted	35cm	100	100
Duranta erecta	3-22,75cm²		Pinnate	Pilous	Silky	Phanerophyte	Indiferent			Seed/vegetative		Insects and birds		Nectar and Pollen	Spring and Summer	Erect	Arbustive	<300cm	72.2222	86.6667
Scaevola taccada	40-160cm²	Evergreen		Glabrous, or sparsely pilous	Succulent		Indiferent	Succulent		Seed		Insect	Compatible	Nectar and Pollen	Spring, summer and autunm	Erect		100cm	72.2222	1100
Schefflera arboricola	32-200cm²	Evergreen	Palmate	Glabrous	Silky		Indiferent			Seed/vegetative	C3	Birds		Pollen	Spring and Summer	Erect	Cespitose	<300cm	77.7778	86.6667
Ipomoea pes-caprae	15-100cm²		Broad/full/simple	Glabrous	Silky	Therophyte	Indiferent			Seed	C3	Insects	Incompatible	Nectar and Pollen	All year	Prostrate	Creeping		77.7778	86.6667
Portulacaria afra	8-37,5cm²	Evergreen	Broad/full/simple	Glabrous	Succulent		Indiferent			Seed/vegetative	C3/CAM	Insects			Spring and Summer		Arbustive	<200cm	66.6667	73.3333
Sedum acre	2-32 mm²	Often deciduous	Broa/full/simple	Glabrous	Succulent	Chamaephyte	Indiferent	Succulent			C3/CAM			Nectar	June -july	Ascending to prostrate/decumbent	Mat forming	3-15cm	77.7778	86.6667
Sedum sexangulare	2,4-12mm²		Broad/full/simple	Glabrous	Succulent	Chamaephyte	Indiferent	Succulent	Stolon		CAM			Nectar	June -july	Ascending	Cespitose, mat forming,		72.2222	80
Allium schoenoprasum	100-300mm²	Evergreen	Broad/full/simple	Glabrous	Silky		Indiferent	Bulb and Rhizome		Seed/vegetative	C3		Self-seeds	Nectar	July-september		Grouped bulb	61cm	77.7778	80
Armeria maritima	5-45mm²		Broad/full/simple	Glabrous		Chamaephyte	Indiferent			Seed	C3	Insects	Cross-pollinates	Pollen	May- july (Summer)	Erect		20cm	72.2222	86.6667	May form adventitious roots		Salt glands on leaves tolerates high heavy metal concentrations and salt water; shade intolerant; present in metallic and non-metallic soils gareat morphological differences
Portulaca oleracea	50-250mm²	Evergreen	Broad/full/simple	Glabrous	Succulent	Therophyte	Anual/Indiferent			Seed/vegetative	C4/CAM	Insects	Compatible	Pollen	May- Aug (Summer)	Prostrate or Erect		30cm	83.3333	86.6667
Delosperma cooperi		Evergreen	Broad/full/simple	Glabrous	Succulent		Indiferent				C3/CAM		Compatible	Pollen	Spring and summer	Prostrate	Cespitose	20cm	66.6667	66.6667
Symphyotrichum laeve	30-50cm²		Broad/full/simple	Glabrous	Silky		Indiferent	Rhizome	Rhizome					Nectar		Erect	Cespitose		55.5556	60
	80	30	96.6667	93.3333	83.3333	60	100	53.3333	30	73.3333	73.3333	53.3333	36.6667	76.6667	80	90	56.6667	86.6667
		Yellow = traits or species with more than 50% missing values; excluded of the analysis

## Sheet: Continental Species
Supplementary Table S3.3 - Plant names and traits used in the analyses
SPECIES NAME and TRAITS	Leaf Area	Leaf phenology	Leaf shape	Glabrous/pilous	Succulent/silky/others	Life form/habit	Maximum plant longevity	Metamorphoses for storage	Metamorphoses for vegetative dispersion	Species reproduction	Photosynthetic Pathway	Flower pollinator	Compatibility	Pollinator reward	Flowering period (South Hemisphere)	Shoot growth	Shoot form	Plant height	% 18 traits	% 15 traits	OBS1		Obs2
Sedum spurium	0,75-6cm²		Broa/full/simple		Succulent	Chamaephyte	Indiferent	Succulent							July-august			10-20cm	44.4444	53.3333	Fibrous root		Contains essential oils, flavonoids, and
Sedum kamtschaticum	1,25-21cm²	Winter deciduous	Broa/full/simple			Chamaephyte	Indiferent	Succulent			C3/CAM			Nectar	June -july	Ascending		15-40cm	61.1111	66.6667
Sedum acre	2-32 mm²	Often deciduous	Broa/full/simple	Glabrous	Succulent	Chamaephyte	Indiferent	Succulent			C3/CAM			Nectar	June -july	Ascending to prostrate/decumbent	Mat forming	3-15cm	77.7778	86.6667
Sedum album	4-500mm²		Broa/full/simple	Short trichomes (invisible to the naked eye), glabrous, or sparsely distributed trichomes	Succulent	Chamaephyte	Indiferent	Succulent			C3/CAM			Nectar	June -july	Ascending to prostrate/decumbent	Cespitose, mat forming	8-20cm	72.2222	86.6667
Sedum rupestre	5-30mm²		Broa/full/simple	Glabrous		Chamaephyte	Indiferent	Succulent							December-march	Prostrate	Mat forming	< 30cm	55.5556	66.6667	Fibrous root
Sedum sexangulare	2,4-12mm²		Broa/full/simple	Glabrous	Succulent	Chamaephyte	Indiferent	Succulent	Stolon		CAM			Nectar	June -july	Ascending	Cespitose, mat forming,		72.2222	80
Allium cernuum	1-15cm²	Evergreen	Broa/full/simple					Bulb and Rhizome		Seed/vegetative	C3	Insects		Pollen	July-september		Grouped bulb	20cm	61.1111	66.6667
Solidago bicolor	5,25 - 105 cm²		Broa/full/simple	Pilous		Hemicryptophyte	Indiferent			Seed	C3	Insects				Erect		20-100cm	55.5556	66.6667
Sedum lineare	0,4-0,5cm²		Broa/full/simple	Glabrous		Chamaephyte	Indiferent	Succulent		Seed	CAM			Nectar	April-may	erect, ascending or decumbent	Mat forming	10-20cm	72.2222	86.6667			Medicinal use
Achillea millefolium	4-60cm²		Pinnate	Glabrous to sparsely or fully pilous	Silky		Indiferent		Stolon and rhizome		C3				July-september or year round	Erect		20-100cm	55.5556	60	Long rhizomes		Aromatic medicinal plant or ornamental
Schizachyrium scoparium	9-18 cm²		Broa/full/simple			Hemicryptophyte	Indiferent			Seed	C4	Wind	Compatible		April-december (sumer-winter)	erect	Tufted	50-150cm	66.6667	73.3333
Campanula rotundifolia	1-10 cm²	Often deciduous	Broa/full/simple	Glabrous			Indiferent	rhizome		Seed	C3	Insects		Nectar/pollen	June-september	erect, ascending or prostrate		10-40cm	72.2222	80
Danthonia spicata			Broa/full/simple		Silky	Hemicryptophyte	Indiferent			seed	C3	Wind	Compatible	Pollen	May-June (spring)	Without stem		20-60cm	66.6667	73.3333
Monarda fistulosa			Broad/full/simple	Glabrous or pilose	Silky		Annual/Indiferent		Rhizome	Seed	C4	Insect	Compatible	Nectar and Pollen	Winter	Erect		90cm	72.2222	73.3333
Sedum roseum	40-75mm²		Broad/full/simple	Glabrous	Succulent		Indiferent	Succulent		Seed		Insect	Incompatible	Nectar	Spring and summer	Erect or ascending	Branched or simple	5-40cm	77.7778	86.6667	Roots erect, robust
Aquilegia canadensis				Glabrous or Pilous	Silky	Hemicryptophyte	Indiferent			Seed	C3	Insects, Birds and wind	Compatible	Nectar	Spring			15-90cm	61.1111	66.6667
Allium schoenoprasum	100-300mm²	Evergreen	Broa/full/simple	Glabrous	Silky		Indiferent	Bulb and Rhizome		Seed/vegetative	C3		Self-seeds	Nectar	July-september		Grouped bulb	61cm	77.7778	80
Trifolium repens	48-100mm²		Palmate	Glabrous		Therophyte	Indiferent		Stolon	Seed	C3				May-october (Summer)	Ascending to prostrate/decumbent		10-30cm	61.1111	66.6667
Sedum hybridum	1,5-6cm²		Broa/full/simple		Succulent		Indiferent	Succulent and rhizome		Seed/vegetative	C3/CAM	Insects		Nectar	June-July	Prostrate	Mat forming	8-15cm	72.2222	86.6667
Sedum hispanicum	4-40mm²		Broa/full/simple	Glabrous or with grandular trichomes	Succulent	Therophyte		Succulent		Seed/vegetative	CAM	Wind and gravity		Nectar	May-july	Erect or ascending	Tufted	5-20cm	77.7778	93.3333	Short, little developed, fibrous and thin roots
Sedum telephium	4-40mcm²		Broad/full/simple	Glabrous	Succulent		Indiferent	Succulent			C3/CAM	Insects		Nectar and Pollen	Summer			50cm	61.1111	73.3333
Echinacea purpurea			Broad/full/simple	Pilous	Silky		Indiferent		Rhizome	Seed/vegetative		Insects	Incompatible	Nectar and Pollen	Spring and summer	Erect	Tufted	50-150cm	72.2222	73.3333	Fibrous root
Phedimus aizoon	1,75-24cm²		Broad/full/simple	Glabrous	Succulent		Indiferent	Succulent		Seed	C3/CAM			Nectar	Summer	Erect	Simple	20-50cm	72.2222	86.6667	Tuberous root
Sporobolus heterolepis			Broad/full/simple	Glabrous	Silky		Indiferent	No	No	Seed	C4	Wind			Winter and spring	Erect	Cespitose	30-90cm	72.2222	80
Festuca rubra	24-1200mm²		Broa/full/simple	Glabrous	Silky	Hemicryptophyte	Indiferent		Rhizome	Vegetative	C3					Erect	Loosely tufted	15-90cm	66.6667	73.3333	Allelopathic, endophytic fungus host
Erigeron canadenses	0,8-15cm²		Broa/full/simple	Glabrous to sparsely pilous		Therophyte	Anual			Seed	C3	Insects	Self compatible	Pollen	December-march	Erect		10-200cm	72.2222	80	Essential oil with antimicotic activity, folk medicine, seeds not dormant
Taraxacum campylodes	4,48-97,5cm		Broa/full/simple	Pilous		Hemicryptophyte				Seed	C3	Insects		Pollen	May-June (spring)	Without stem		15-20cm	61.1111	73.3333
Rudbeckia hirta	4-200cm²		Broad/full/simple	Pilous	Silky	Hemicryptophyte	Anual/Indiferent			Seed	C3	Insect	Compatible	Nectar and Pollen	Spring and summer	Erect		100cm	77.7778	86.6667	Fibrous root
Symphytrichum novae-angliae	180-240mm²		Broad/full/simple	Pilous	Silky		Indiferent		Rhizome	Seed/vegetative		Wind, insects and birds	Incompatible	Nectar	Summer and autunm	Ascending to prostrate/decumbent	clustered or erect	30-120cm	77.7778	80	Thick roots
Medicago lupulina	20-120mm²		Palmate	Pilous, sometimes glabrous	Silky	Therophyte	Anual/Indiferent			Seed/vegetative	C3	Insects	Compatible		Spring and summer	Ascending to prostrate/decumbent	Tufted	15-80cm	77.7778	86.6667	Roots with nodules hosting nitrogen-fixing bacteria
	83.3333	16.6667	96.6667	80	66.6667	60	90	53.3333	26.6667	73.3333	83.3333	60	36.6667	70	93.3333	83.3333	56.6667	96.6667
		Yellow = traits or species with more than 50% missing values; excluded of the analysis

## Sheet: Dry Species
Supplementary Table S3.4 - Plant names and traits used in the analyses
SPECIES NAME and TRAITS	Leaf Area	Leaf phenology	Leaf shape	Glabrous/pilous	Succulent/silky/others	Life form/habit	Maximum plant longevity	Metamorphoses for storage	Metamorphoses for vegetative dispersion	Species reproduction	Photosynthetic Pathway	Flower pollinator	Compatibility	Pollinator reward	Flowering period (South Hemisphere)	Shoot growth	Shoot form	Plant height	% 18 traits	% 15 traits	OBS1		Obs2
Sedum rupestre	5-30mm²		Broad/full/simple	Glabrous		Chamaephyte	Indiferent	Succulent							December-march	Prostrate	Mat forming	até 30cm	55.5556	66.6667	Fibrous root
Sedum acre	2-32 mm²	Often deciduous	Broad/full/simple	Glabrous	Succulent	Chamaephyte	Indiferent	Succulent			C3/CAM			Nectar	June -july	Ascending to prostrate/decumbent	Mat forming	3-15cm	77.7778	86.6667
Sedum album	4-500mm²		Broad/full/simple	Short trichomes (invisible to the naked eye), glabrous, or sparsely distributed trichomes	Succulent	Chamaephyte	Indiferent	Succulent			C3/CAM			Nectar	June -july	Ascending to prostrate/decumbent	Cespitose, mat forming	8-20cm	72.2222	86.6667
Sedum spurium	0,75-6cm²		Broad/full/simple		Succulent	Chamaephyte	Indiferent	Succulent							July-august			10-20cm	44.4444	53.3333	Fibrous root		Contains essential oils, flavonoids, and
Phyla nodiflora	0,5-4,5cm²		Broad/full/simple	Pilous, sometimes glabrous	Silky		Indiferent		Stolon	Seed/vegetative	C3	Insects and birds	Compatible	Nectar and pollen	Spring, summer and autumn	Prostrate to erect		30-90cm	77.7778	80
Delosperma cooperi		Evergreen	Broad/full/simple	Glabrous	Succulent		Indiferent				C3/CAM		Compatible	Pollen	Spring and summer	Prostrate	Cespitose	20cm	66.6667	66.6667
Sedum lineare	0,4-0,5cm²		Broad/full/simple	Glabrous		Chamaephyte	Indiferent	Succulent		Seed	CAM			Nectar	April-may	erect, ascending or decumbent	Mat forming	10-20cm	86.6667	86.6667			Medicinal use
Portulaca grandiflora	5-150mm²		Broad/full/simple	Pilous, sometimes glabrous	Succulent	Therophyte	Anual/Indiferent	Succulent		Seed	C4/CAM	Insects	Compatible	Pollen		Ascending or erect		15-30cm	77.7778	86.6667	Tuberous and fibrous root
Ophiopogon japonicus	1,5-175cm²		Broad/full/simple		Silky	Geophyte	Indiferent			Seed		Insects		Pollen	June-July(Summer)	Prostrate	Tufted	15cm	66.6667	80
Mesembryanthemum cordifolium	0,5-15cm²		Broad/full/simple	Glabrous	Succulent		Indiferent	Succulent	Stolon and rhizome	Seed/vegetative	C3/CAM	Insects			Summer and autumn	Prostrate	Mat forming or weakly erect	25cm	77.7778	86.6667
Chondrosum gracile	30-200mm²		Broad/full/simple	Glabrous	Silky	Hemicryptophyte	Indiferent			Seed/vegetative	C4/CAM	Wind, insect, brids and mammals			Summer and autumn	Erect	Densely tufted	15-60cm	72.2222	86.6667	Adventicious roots
Iris tectorum	22,5-375cm²		Broad/full/simple	Glabrous	Silky		Indiferent		Rhizome	Seed		Insects	Compatible	Pollen	Spring and summer	Prostrate	Tufted	20-40cm	77.7778	80	short, slender roots next to the rhizome
Hylotelephium erythrostictum	9-38,5cm²		Broad/full/simple		Succulent		Indiferent	Succulent		Seed	C3/CAM			Nectar	Winter and spring		Simple	30-70cm	61.1111	73.3333	salt tolerant
Delosperma nubigenum		Evergreen	Broad/full/simple		Succuçent		Indiferent	Succulent	Stolon	Vegetative		Insects	Compatible	Pollen	Summer	Prostrate	Mat forming	10cm	77.7778	73.3333	Succulent roots
Eschscholzia californica			Palmate	Glabrous	Silky		Anual/Indiferent			Seed		Insects	Compatible	Pollen	Spring and summer	Erect to spreading	Tufted	30-60cm	66.6667	73.3333
Eriogonum umbellatum var. aureum	0,5-3cm³			Glabrous			Indiferent								Summer	Compact mats			27.7778	33.3333
Sedum kamtschaticum	1,25-21cm²	Winter deciduous	Broad/full/simple			Chamaephyte	Indiferent	Succulent			C3/CAM			Nectar	June -july	Ascending		15-40cm	61.1111	66.6667
Festuca rubra	24-1200mm²		Broad/full/simple	Glabrous	Silky	Hemicryptophyte	Indiferent		Rhizome	Vegetative	C3					Erect	Loosely tufted	15-90cm	66.6667	73.3333	Allelopathic, endophytic fungus host
Talinum calycinum			Broad/full/simple	Glabrous	Succulent		Indiferent	Succulent and rhizome		Seed	C3/CAM				May-setember	Ascending or erect		7-20cm	55.5556	60	Fibrous root
Sedum hybridum	1,5-6cm²		Broad/full/simple		Succulent		Indiferent	Succulent and rhizome		Seed/vegetative	C3/CAM	Insects		Nectar	June-July	Prostrate	Mat forming	8-15cm	72.2222	86.6667
Allium cernuum	1-15cm²	Evergreen	Broad/full/simple					Bulb and Rhizome		Seed/vegetative	C3	Insects		Pollen	July-september		Grouped bulb	20cm	61.1111	66.6667
Lavandula angustifolia	90-250mm²	Evergreen	Broad/full/simple	Pilous		Chamaephyte	Indiferent			Seed/vegetative		Insects		Nectar/pollen/oil	June-August (summer)		Clumps	40-60cm	66.6667	73.3333	Branched fibrous root
Symphyotrichum laeve	30-50cm²		Broad/full/simple	Glabrous	Silky		Indiferent	Rhizome	Rhizome					Nectar		Erect	Cespitose		55.5556	60
Lactuca sativa			Broad/full/simple	Glabrous	Silky	Hemicryptophyte	Anual/Bianual			Seed	C3	Insects	Incompatible	Pollen	Mar-May (spring)	Erect		40cm	72.2222	80
Sedum spathulifolium	6-448mm²	Evergreen	Broad/full/simple	Glabrous	Succulent	Chamaephyte	Anual/Indiferent	Succulent	Rhizome			Insects		Nectar and pollen		Procumbent or creeping	Mat forming	20cm	77.7778	80
Buchloe dactyloides			Broad/full/simple		Silky	Hemicryptophyte	Indiferent	Rhizome	Stolon and rhizome	Seed/vegetative	C4	Wind	Compatible	Pollen				5-13cm	66.6667	66.6667
Chrysocephalum apiculatum			Broad/full/simple	Pilous	Silky	Hemicryptophyte				Seed/vegetative		Wind and insects				Prostrate to erect		40cm	44.4444	53.3333
Aquilegia canadensis				Glabrous or Pilous	Silky	Hemicryptophyte	Indiferent			Seed	C3	Insects, Birds and wind	Compatible	Nectar	Spring			15-90cm	61.1111	66.6667
Lampranthus spectabilis	20-100mm²		Broad/full/simple	Glabrous	Succulent		Indiferent	Succulent		Seed/vegetative	C3/CAM				Spring and summer	Prostrate		30cm	61.1111	73.3333
Nassella tenuissima	35cm²		Broad/full/simple	Glabrous	silky	Hemicryptophyte	Indiferent			seed					summer		tufted	25-100cm	55.5556	66.6667
Sporobolus heterolepis			Broad/full/simple	Glabrous	Silky		Indiferent	No	No	Seed	C4	Wind			Winter and spring	Erect	Cespitose	30-90cm	72.2222	80
	73.3333	23.3333	96.6667	76.6667	83.3333	56.6667	96.6667	60	30	73.3333	63.3333	56.6667	30	66.6667	83.3333	80	66.6667	96.6667
		Yellow = traits or species with more than 50% missing values; excluded of the analysis
