# Supplementary material for: Life at the Top: Extensive Green Roof Plant Species and Their Traits for Urban Use
Source: MDPI journal article supplement (doi:10.3390/plants14050735), 2025-02-27
Supplement: s1 [file s1]

**Supplementary Table S1**-Plant list used in this study (updated 12 September 2023)

| Article Species Name                                         | Family         | Plant List Name |
|--------------------------------------------------------------|----------------|-----------------|
| <i>Abelia</i> × <i>grandiflora</i> (Ravelli ex André) Rehder | Caprifoliaceae | Unresolved      |
| <i>Abronia fragrans</i> Nutt. ex Hook.                       | Nyctaginaceae  | Accepted        |
| <i>Acacia confusa</i> Merr.                                  | Leguminosae    | Accepted        |
| <i>Acacia cardiophylla</i> Benth.                            | Leguminosae    | Accepted        |
| <i>Acacia lasiocarpa</i> Benth.                              | Leguminosae    | Accepted        |
| <i>Acaena caesiglauc</i> a Bergmans                          | Rosaceae       | Accepted        |
| <i>Acalypha australis</i> L.                                 | Euphorbiaceae  | Accepted        |
| <i>Acalypha communis</i> Müll.Arg.                           | Euphorbiaceae  | Accepted        |
| <i>Acalypha poiretii</i> Spreng.                             | Euphorbiaceae  | Accepted        |
| <i>Acalypha wilkesiana</i> Müll.Arg.                         | Euphorbiaceae  | Accepted        |
| <i>Acantholimon acerosum</i> (Willd.) Boiss.                 | Plumbaginaceae | Accepted        |
| <i>Acantholimon armenum</i> Boiss. & A.Huet.                 | Plumbaginaceae | Accepted        |
| <i>Acantholimon litvinovii</i> Lincz.                        | Plumbaginaceae | Accepted        |
| <i>Acer palmatum</i> Thunb.                                  | Sapindaceae    | Accepted        |
| <i>Acer platanoides</i> L.                                   | Sapindaceae    | Accepted        |
| <i>Acer pseudoplatanus</i> L.                                | Sapindaceae    | Accepted        |
| <i>Achillea millefolium</i> L.                               | Compositae     | Accepted        |
| <i>Achillea tomentosa</i> L.                                 | Compositae     | Accepted        |
| <i>Achillea umbellata</i> Sibth. & Sm.                       | Compositae     | Accepted        |
| <i>Achyrocline bogotensis</i> (Kunth) DC.                    | Compositae     | Accepted        |
| <i>Acmispon glaber</i>                                       | Leguminosae    | Unresolved      |
| <i>Acorus calamus</i> L.                                     | Acoraceae      | Accepted        |
| <i>Acorus gramineus</i> Aiton                                | Acoraceae      | Accepted        |
| <i>Actinotus helianthi</i> Labill.                           | Apiaceae       | Accepted        |
| <i>Adenanthos pungens</i> Meisn.                             | Proteaceae     | Accepted        |
| <i>Adenium obesum</i> (Forssk.) Roem. & Schult.              | Apocynaceae    | Accepted        |
| <i>Adonis aestivalis</i> L.                                  | Ranunculaceae  | Accepted        |

|                                                     |                |                                                                               |
|-----------------------------------------------------|----------------|-------------------------------------------------------------------------------|
| <i>Aechmea amicornum</i> B.R.Silva & H.Luther.      | Bromeliaceae   | Accepted                                                                      |
| <i>Aechmea cefaloides</i> J.A.Siqueira & Leme.      | Bromeliaceae   | Accepted                                                                      |
| <i>Aechmea pectinata</i> Baker.                     | Bromeliaceae   | Accepted                                                                      |
| <i>Aeonium arboreum</i> Webb & Berthel.             | Crassulaceae   | Accepted                                                                      |
| <i>Aeonium subplanum</i>                            | Crassulaceae   | Synonym of <i>Aeonium canariense</i> var. <i>subplanum</i> (Praeger) H.Y.Liu. |
| <i>Aeschynomene indica</i> L.                       | Leguminosae    | Accepted                                                                      |
| <i>Aethionema saxatile</i> (L.) R.Br.               | Brassicaceae   | Accepted                                                                      |
| <i>Aethionema schistosum</i> Boiss. & Kotschy.      | Brassicaceae   | Accepted                                                                      |
| <i>Agalinis communis</i> (Cham. & Schltdl.) D'Arcy  | Orobanchaceae  | Accepted                                                                      |
| <i>Agapanthus praecox</i> Willd.                    | Amaryllidaceae | Accepted                                                                      |
| <i>Agastache foeniculum</i> (Pursh) Kuntze          | Lamiaceae      | Accepted                                                                      |
| <i>Agastache rugosa</i> (Fisch. & C.A.Mey.) Kuntze. | Lamiaceae      | Accepted                                                                      |
| <i>Agastache rupestris</i> (Greene) Standl.         | Lamiaceae      | Accepted                                                                      |
| <i>Agave attenuata</i> Salm-Dyck                    | Asparagaceae   | Accepted                                                                      |
| <i>Agave gypsophylla</i> Gentry.                    | Asparagaceae   | Accepted                                                                      |
| <i>Agave parryi</i> Engelm.                         | Asparagaceae   | Accepted                                                                      |
| <i>Agave stricta</i> Salm-Dyck                      | Asparagaceae   | Accepted                                                                      |
| <i>Agave victoriae-reginae</i> T.Moore              | Asparagaceae   | Accepted                                                                      |
| <i>Ageratum conyzoides</i> (L.) L.                  | Compositae     | Accepted                                                                      |
| <i>Ageratum houstonianum</i> Mill.                  | Compositae     | Accepted                                                                      |
| <i>Ageratum hybrid</i> 'Artist blue'                | Compositae     | No results                                                                    |
| <i>Aglaia odorata</i> Lour.                         | Meliaceae      | Accepted                                                                      |
| <i>Agrimonia eupatoria</i> L.                       | Rosaceae       | Accepted                                                                      |
| <i>Agropyron cristatum</i> (L.) Gaertn.             | Poaceae        | Accepted                                                                      |

|                                                                 |                 |                                                             |
|-----------------------------------------------------------------|-----------------|-------------------------------------------------------------|
| <i>Agrostemma githago</i> L.                                    | Caryophyllaceae | Accepted                                                    |
| <i>Agrostemma gracile</i>                                       | Caryophyllaceae | Synonym of <i>Agrostemma brachyloba</i> (Fenzl)<br>K.Hammer |
| <i>Agrostis capillaris</i> L.                                   | Poaceae         | Accepted                                                    |
| <i>Agrostis hyemalis</i> (Walter) Britton,<br>Sterns & Poggenb. | Poaceae         | Accepted                                                    |
| <i>Agrostis pallens</i> Trin.                                   | Poaceae         | Accepted                                                    |
| <i>Agrostis stolonifera</i> L.                                  | Poaceae         | Accepted                                                    |
| <i>Agrostis tenuis</i>                                          | Poaceae         | Synonym of <i>Agrostis idahoensis</i> Nash.                 |
| <i>Ailanthus altissima</i> (Mill.) Swingle                      | Simaroubaceae   | Accepted                                                    |
| <i>Aira caryophyllea</i> L.                                     | Poaceae         | Accepted                                                    |
| <i>Ajuga ciliata</i> Bunge                                      | Lamiaceae       | Accepted                                                    |
| <i>Ajuga genevensis</i> L.                                      | Lamiaceae       | Accepted                                                    |
| <i>Ajuga reptans</i> L.                                         | Lamiaceae       | Accepted                                                    |
| <i>Alliaria petiolata</i> (M.Bieb.) Cavara<br>& Grande          | Brassicaceae    | Accepted                                                    |
| <i>Aletris farinosa</i> L.                                      | Nartheciaceae   | Accepted                                                    |
| <i>Allamanda cathartica</i> L.                                  | Apocynaceae     | Accepted                                                    |
| <i>Allium acuminatum</i> Hook.                                  | Amaryllidaceae  | Accepted                                                    |
| <i>Allium ampeloprasum</i> L.                                   | Amaryllidaceae  | Accepted                                                    |
| <i>Allium caeruleum</i> Pall.                                   | Amaryllidaceae  | Accepted                                                    |
| <i>Allium canadense</i> L.                                      | Amaryllidaceae  | Accepted                                                    |
| <i>Allium carinatum</i> L.                                      | Amaryllidaceae  | Accepted                                                    |
| <i>Allium cepa</i> L.                                           | Amaryllidaceae  | Accepted                                                    |
| <i>Allium cernuum</i> Roth.                                     | Amaryllidaceae  | Accepted                                                    |
| <i>Allium flavum</i> L.                                         | Amaryllidaceae  | Accepted                                                    |
| <i>Allium karataviense</i> Regel.                               | Amaryllidaceae  | Accepted                                                    |
| <i>Allium oleraceum</i> L.                                      | Amaryllidaceae  | Accepted                                                    |
| <i>Allium ostrowskianum</i>                                     | Amaryllidaceae  | Synonym of <i>Allium oreophilum</i> C.A.Mey.                |
| <i>Allium roseum</i> L.                                         | Amaryllidaceae  | Accepted                                                    |

|                                                       |                  |                                                                     |
|-------------------------------------------------------|------------------|---------------------------------------------------------------------|
| <i>Allium sativum</i> L.                              | Amaryllidaceae   | Accepted                                                            |
| <i>Allium schoenoprasum</i> L.                        | Amaryllidaceae   | Accepted                                                            |
| <i>Allium senescens</i> L.                            | Amaryllidaceae   | Accepted                                                            |
| <i>Allium sphaerocephalon</i> L.                      | Amaryllidaceae   | Accepted                                                            |
| <i>Allium stellatum</i> Nutt. ex Ker Gawl.            | Amaryllidaceae   | Accepted                                                            |
| <i>Allium triquetrum</i> L.                           | Amaryllidaceae   | Accepted                                                            |
| <i>Allium unifolium</i> Kellogg.                      | Amaryllidaceae   | Accepted                                                            |
| <i>Alocasia 'Amazonica'</i>                           | Araceae          | Synonym of <i>Alocasia</i> × <i>mortfontanensis</i> André.          |
| <i>Aloe 'Always Red'</i>                              | Xanthorrhoeaceae | No results                                                          |
| <i>Aloe 'Aries'</i>                                   | Xanthorrhoeaceae | No results                                                          |
| <i>Aloe barbadensis</i> Mill.                         | Xanthorrhoeaceae | Synonym of <i>Aloe vera</i> (L.) Burm.f.                            |
| <i>Aloe mitriformis</i> Mill.                         | Xanthorrhoeaceae | Synonym of <i>Aloe perfoliata</i> L.                                |
| <i>Aloe 'Southern Cross'</i>                          | Xanthorrhoeaceae | No results                                                          |
| <i>Aloe 'Topaz'</i>                                   | Xanthorrhoeaceae | No results                                                          |
| <i>Aloe vera</i> (L.) Burm.f.                         | Xanthorrhoeaceae | Accepted                                                            |
| <i>Alopecurus pratensis</i> L.                        | Poaceae          | Accepted                                                            |
| <i>Alternanthera bettzickiana</i> (Regel) G.Nicholson | Amaranthaceae    | Accepted                                                            |
| <i>Alternanthera dentata</i> Stuchlík ex R.E.Fr.      | Amaranthaceae    | Synonym of <i>Alternanthera ramosissima</i> (Mart.) Chodat & Hassl. |
| <i>Alternanthera ficoidea</i> (L.) Sm.                | Amaranthaceae    | Accepted                                                            |
| <i>Alternanthera paronychioides</i> A.St.-Hil.        | Amaranthaceae    | Accepted                                                            |

|                                                                            |               |                                                 |
|----------------------------------------------------------------------------|---------------|-------------------------------------------------|
| <i>Alyogyne huegelii</i> (Endl.) Fryxell                                   | Malvaceae     | Accepted                                        |
| <i>Alysicarpus vaginalis</i> (L.) DC.                                      | Leguminosae   | Accepted                                        |
| <i>Alyssum alyssoides</i> (L.) L.                                          | Brassicaceae  | Accepted                                        |
| <i>Alyssum maritimum</i>                                                   | Brassicaceae  | Synonym of <i>Lobularia maritima</i> (L.) Desv. |
| <i>Alyssum montanum</i> L.                                                 | Brassicaceae  | Accepted                                        |
| <i>Amaranthus albus</i> L.                                                 | Amaranthaceae | Accepted                                        |
| <i>Amaranthus blitoides</i> S.Watson                                       | Amaranthaceae | Accepted                                        |
| <i>Amaranthus cruentus</i> L.                                              | Amaranthaceae | Accepted                                        |
| <i>Amaranthus dubius</i> Mart. ex Thell.                                   | Amaranthaceae | Accepted                                        |
| <i>Amaranthus retroflexus</i> L.                                           | Amaranthaceae | Accepted                                        |
| <i>Amaranthus tricolor</i> L.                                              | Amaranthaceae | Accepted                                        |
| <i>Amaranthus tuberculatus</i> (Moq.)<br>Sauer                             | Amaranthaceae | Accepted                                        |
| <i>Ambrosia artemisiifolia</i> L.                                          | Compositae    | Accepted                                        |
| <i>Ambrosia chamissonis</i> (Less.)<br>Greene.                             | Compositae    | Accepted                                        |
| <i>Ammobium alatum</i> R.Br.                                               | Compositae    | Accepted                                        |
| <i>Amorpha canescens</i> Pursh.                                            | Leguminosae   | Accepted                                        |
| <i>Amorpha fruticosa</i> L.                                                | Leguminosae   | Accepted                                        |
| <i>Amorpha nana</i> C.Fraser.                                              | Leguminosae   | Accepted                                        |
| <i>Amsonia tabernaemontana</i> var.<br><i>salicifolia</i> (Pursh) Woodson. | Apocynaceae   | Accepted                                        |
| <i>Anacamptis pyramidalis</i> (L.) Rich.                                   | Orchidaceae   | Accepted                                        |
| <i>Anacyclus depressus</i> Ball                                            | Compositae    | Synonym of <i>Anacyclus pyrethrum</i> (L.) Lag. |
| <i>Anacyclus maroccanus</i> (Ball) Ball.                                   | Compositae    | Accepted                                        |
| <i>Anagallis arvensis</i> L.                                               | Primulaceae   | Accepted                                        |
| <i>Anagallis monelli</i> L.                                                | Primulaceae   | Accepted                                        |
| <i>Anaphalis margaritacea</i> (L.) Benth.<br>& Hook.f.                     | Compositae    | Accepted                                        |
| <i>Anastatica hierochunta</i> L.                                           | Brassicaceae  | Accepted                                        |
| <i>Andropogon gerardii</i> Vitman.                                         | Poaceae       | Accepted                                        |

|                                                      |               |                                                    |
|------------------------------------------------------|---------------|----------------------------------------------------|
| <i>Andropogon gyrans</i> Ashe.                       | Poaceae       | Accepted                                           |
| <i>Andropogon ternarius</i> Michx.                   | Poaceae       | Accepted                                           |
| <i>Andropogon virginicus</i> L.                      | Poaceae       | Accepted                                           |
| <i>Anemone canadensis</i> L.                         | Ranunculaceae | Accepted                                           |
| <i>Anemone caroliniana</i> Walter.                   | Ranunculaceae | Accepted                                           |
| <i>Anemone cylindrica</i> A.Gray.                    | Ranunculaceae | Accepted                                           |
| <i>Anemone hortensis</i> L.                          | Ranunculaceae | Accepted                                           |
| <i>Anemone patens</i> L.                             | Ranunculaceae | Accepted                                           |
| <i>Anemone pulsatilla</i> L.                         | Ranunculaceae | Accepted                                           |
| <i>Anemone sylvestris</i> L.                         | Ranunculaceae | Accepted                                           |
| <i>Anemone virginiana</i> L.                         | Ranunculaceae | Accepted                                           |
| <i>Anethum graveolens</i> L.                         | Apiaceae      | Accepted                                           |
| <i>Anigozanthos</i> 'Big Red'                        | Haemodoraceae | No results                                         |
| <i>Anoda cristata</i> (L.) Schltdl.                  | Malvaceae     | Accepted                                           |
| <i>Anredera cordifolia</i> (Ten.) Steenis            | Basellaceae   | Accepted                                           |
| <i>Antennaria dioica</i> (L.) Gaertn.                | Compositae    | Accepted                                           |
| <i>Antennaria neglecta</i> Greene.                   | Compositae    | Accepted                                           |
| <i>Antennaria parvifolia</i> 'McClintock'            | Compositae    | Variety of <i>Antennaria parvifolia</i> Nutt.      |
| <i>Antennaria parvifolia</i> Nutt.                   | Compositae    | Accepted                                           |
| <i>Antennaria plantaginifolia</i> (L.)<br>Richardson | Compositae    | Accepted                                           |
| <i>Anthemis arvensis</i> L.                          | Compositae    | Accepted                                           |
| <i>Anthemis maritima</i> L.                          | Compositae    | Accepted                                           |
| <i>Anthemis pseudocotula</i> Boiss.                  | Compositae    | Accepted                                           |
| <i>Anthemis tinctoria</i>                            | Compositae    | Synonym of <i>Cota tinctoria</i> (L.) J.Gay.       |
| <i>Anthericum liliago</i> L.                         | Asparagaceae  | Accepted                                           |
| <i>Anthoxanthum aristatum</i> Boiss.                 | Poaceae       | Accepted                                           |
| <i>Anthoxanthum occidentale</i>                      | Poaceae       | Synonym of <i>Hierochloa occidentalis</i> Buckley. |
| <i>Anthoxanthum odoratum</i> L.                      | Poaceae       | Accepted                                           |
| <i>Anthyllis montana</i> L.                          | Leguminosae   | Accepted                                           |

|                                               |                |                                                                                     |
|-----------------------------------------------|----------------|-------------------------------------------------------------------------------------|
| <i>Anthyllis vulneraria</i> L.                | Leguminosae    | Accepted                                                                            |
| <i>Antigonon leptopus</i> Hook. & Arn.        | Polygonaceae   | Accepted                                                                            |
| <i>Antirrhinum linkianum</i> Boiss. & Reut.   | Plantaginaceae | Synonym of <i>Antirrhinum majus</i> subsp. <i>linkianum</i> (Boiss. & Reut.) Rothm. |
| <i>Antirrhinum majus</i> L.                   | Plantaginaceae | Accepted                                                                            |
| <i>Antitrichia californica</i> Sull.          | Leucodontaceae | Accepted                                                                            |
| <i>Anundo donax</i> var. <i>vericolor</i>     | Poaceae        | Synonym of <i>Arundo donax</i> L.                                                   |
| <i>Aphanes arvensis</i> L.                    | Rosaceae       | Accepted                                                                            |
| <i>Apium graveolens</i> L.                    | Apiaceae       | Accepted                                                                            |
| <i>Aptenia cordifolia</i>                     | Aizoaceae      | Synonym of <i>Mesembryanthemum cordifolium</i> L.f.                                 |
| <i>Aptenia lancifolia</i> L.Bolus             | Aizoaceae      | Synonym of <i>Mesembryanthemum lancifolium</i> (L.Bolus) Klak                       |
| <i>Aquilegia canadensis</i> L.                | Ranunculaceae  | Accepted                                                                            |
| <i>Aquilegia formosa</i> Fisch. ex DC.        | Ranunculaceae  | Accepted                                                                            |
| <i>Aquilegia vulgaris</i> L.                  | Ranunculaceae  | Accepted                                                                            |
| <i>Arabidopsis thaliana</i> (L.) Heynh.       | Brassicaceae   | Accepted                                                                            |
| <i>Arabis alpina</i> L.                       | Brassicaceae   | Accepted                                                                            |
| <i>Arabis alpina</i> ssp. <i>caucasica</i>    | Brassicaceae   | Synonym of <i>Arabis caucasica</i> Willd.                                           |
| <i>Arabis collina</i> Ten.                    | Brassicaceae   | Accepted                                                                            |
| <i>Arabis lyrata</i>                          | Brassicaceae   | Synonym of <i>Arabidopsis lyrata</i> (L.) O'Kane & Al-Shehbaz.                      |
| <i>Arachis duranensis</i> Krapov. & W.C.Greg. | Leguminosae    | Accepted                                                                            |
| <i>Arachis hypogaea</i> L.                    | Leguminosae    | Accepted                                                                            |
| <i>Arachis pintoii</i> Krapov. & W.C.Greg.    | Leguminosae    | Accepted                                                                            |

|                                                                   |                 |                                                       |
|-------------------------------------------------------------------|-----------------|-------------------------------------------------------|
| <i>Arachis repens</i> Handro                                      | Leguminosae     | Accepted                                              |
| <i>Arbutus unedo</i> L.                                           | Ericaceae       | Accepted                                              |
| <i>Arctostaphylos uva-ursi</i> (L.) Spreng.                       | Ericaceae       | Accepted                                              |
| <i>Arctostaphylos edmundsii</i> 'Big Sur'                         | Ericaceae       | Variety of <i>Arctostaphylos edmundsii</i> J.T.Howell |
| <i>Arctostaphylos patula</i> Greene.                              | Ericaceae       | Accepted                                              |
| <i>Arctostaphylos x coloradoensis</i> 'Cascade'                   | Ericaceae       | Unresolved                                            |
| <i>Arenaria alfacarensis</i> Pamp.                                | Caryophyllaceae | Accepted                                              |
| <i>Arenaria serpyllifolia</i> L.                                  | Caryophyllaceae | Accepted                                              |
| <i>Arenaria stricta</i>                                           | Caryophyllaceae | Unresolved                                            |
| <i>Argemone polyanthemus</i> (Fedde) Ownbey                       | Papaveraceae    | Accepted                                              |
| <i>Argyrolobium zanonii</i> (Turra) P.W.Ball                      | Leguminosae     | Accepted                                              |
| <i>Arisaema triphyllum</i> (L.) Schott                            | Araceae         | Accepted                                              |
| <i>Aristida oligantha</i> Michx.                                  | Poaceae         | Accepted                                              |
| <i>Armeria arenaria</i> (Pers.) Schult.                           | Plumbaginaceae  | Accepted                                              |
| <i>Armeria juniperifolia</i> (Vahl) Hoffmanns. & Link.            | Plumbaginaceae  | Accepted                                              |
| <i>Armeria maritima</i> (Mill.) Willd.                            | Plumbaginaceae  | Accepted                                              |
| <i>Armeria maritima</i> ssp. <i>californica</i> (Boiss.) Porsild. | Plumbaginaceae  | Accepted                                              |
| <i>Armeria maritima</i> subsp. <i>maritima</i>                    | Plumbaginaceae  | Synonym of <i>Armeria maritima</i> (Mill.) Willd.     |
| <i>Armeria pungens</i> (Link) Hoffmanns. & Link.                  | Plumbaginaceae  | Accepted                                              |
| <i>Arrhenatherum elatius</i> (L.) P.Beauv. ex J.Presl & C.Presl.  | Poaceae         | Accepted                                              |
| <i>Artemisia absinthium</i> L.                                    | Compositae      | Accepted                                              |
| <i>Artemisia alba</i> Turra                                       | Compositae      | Accepted                                              |
| <i>Artemisia annua</i> L.                                         | Compositae      | Accepted                                              |
| <i>Artemisia californica</i> Less.                                | Compositae      | Accepted                                              |



|                                                                         |                  |                                                                                    |
|-------------------------------------------------------------------------|------------------|------------------------------------------------------------------------------------|
| <i>Artemisia campestris</i> L.                                          | Compositae       | Accepted                                                                           |
| <i>Artemisia campestris subsp. caudata</i><br>(Michx.) H.M.Hall & Clem. | Compositae       | Accepted                                                                           |
| <i>Artemisia caudata</i>                                                | Compositae       | Synonym of <i>Artemisia campestris subsp. caudata</i><br>(Michx.) H.M.Hall & Clem. |
| <i>Artemisia douglasiana</i> Besser ex Besser.                          | Compositae       | Accepted                                                                           |
| <i>Artemisia frigida</i> Willd.                                         | Compositae       | Accepted                                                                           |
| <i>Artemisia judaica</i> L.                                             | Compositae       | Accepted                                                                           |
| <i>Artemisia indica</i> Willd.                                          | Compositae       | Accepted                                                                           |
| <i>Artemisia ludoviciana</i> Nutt.                                      | Compositae       | Accepted                                                                           |
| <i>Artemisia pycnocephala</i> (Less.) DC.                               | Compositae       | Accepted                                                                           |
| <i>Artemisia sieberi</i> Besser.                                        | Compositae       | Accepted                                                                           |
| <i>Artemisia stelleriana</i> Besser.                                    | Compositae       | Accepted                                                                           |
| <i>Artemisia vulgaris</i> L.                                            | Compositae       | Accepted                                                                           |
| <i>Arthrocnemum macrostachyum</i><br>(Moric.) K.Koch                    | Amaranthaceae    | Accepted                                                                           |
| <i>Arthropodium milleflorum</i> (DC.)<br>J.F.Macbr.                     | Asparagaceae     | Accepted                                                                           |
| <i>Arthropodium minus</i> R.Br.                                         | Asparagaceae     | Accepted                                                                           |
| <i>Arthropodium strictum</i> R.Br.                                      | Asparagaceae     | Synonym of <i>Dichopogon strictus</i> (R.Br.) Baker                                |
| <i>Asarum caudatum</i> Lindl.                                           | Aristolochiaceae | Accepted                                                                           |
| <i>Asclepias curassavica</i> L.                                         | Apocynaceae      | Accepted                                                                           |
| <i>Asclepias purpurascens</i> L.                                        | Apocynaceae      | Accepted                                                                           |
| <i>Asclepias syriaca</i> L.                                             | Apocynaceae      | Accepted                                                                           |
| <i>Asclepias tuberosa</i> L.                                            | Apocynaceae      | Accepted                                                                           |
| <i>Asclepias verticillata</i> L.                                        | Apocynaceae      | Accepted                                                                           |
| <i>Asclepias viridiflora</i> Raf.                                       | Apocynaceae      | Accepted                                                                           |
| <i>Asparagus densiflorus</i> (Kunth)<br>Jessop                          | Asparagaceae     | Accepted                                                                           |

|                                                 |                  |                                                                      |
|-------------------------------------------------|------------------|----------------------------------------------------------------------|
| <i>Asparagus plumosus</i>                       | Asparagaceae     | Synonym of <i>Asparagus setaceus</i> (Kunth) Jessop.                 |
| <i>Asphodelus fistulosus</i> L.                 | Xanthorrhoeaceae | Accepted                                                             |
| <i>Aster alpinus</i> L.                         | Compositae       | Accepted                                                             |
| <i>Aster amellus</i> L.                         | Compositae       | Accepted                                                             |
| <i>Aster laevis</i>                             | Compositae       | Synonym of <i>Symphyotrichum laeve</i> (L.) Á.Löve & D.Löve.         |
| <i>Aster linosyris</i>                          | Compositae       | Synonym of <i>Galatella linosyris</i> (L.) Rchb.f.                   |
| <i>Aster novaeangliae</i>                       | Compositae       | Synonym of <i>Symphyotrichum novaeangliae</i> (L.) G.L.Nesom.        |
| <i>Aster novae-belgii</i>                       | Compositae       | Synonym of <i>Symphyotrichum novibelgii</i> (L.) G.L.Nesom.          |
| <i>Aster oolentangiensis</i>                    | Compositae       | Synonym of <i>Symphyotrichum oolentangiense</i> (Riddell) G.L.Nesom. |
| <i>Aster pilosus</i>                            | Compositae       | Synonym of <i>Symphyotrichum pilosum</i> (Willd.) G.L.Nesom.         |
| <i>Aster subulatus</i> (Michx.) Hort. ex Michx. | Compositae       | Accepted                                                             |
| <i>Asteriscus maritimus</i>                     | Compositae       | Synonym of <i>Pallenis maritima</i> (L.) Greuter.                    |
| <i>Astilbe 'Purple Lance'</i>                   | Saxifragaceae    | Synonym of <i>Astilbe rubra</i> Hook.f. & Thomson.                   |
| <i>Astragalus agrestis</i> G.Don.               | Leguminosae      | Accepted                                                             |
| <i>Astragalus alpinus</i> L.                    | Leguminosae      | Accepted                                                             |
| <i>Astragalus canadensis</i> L.                 | Leguminosae      | Accepted                                                             |

|                                                                        |                |                                                                                        |
|------------------------------------------------------------------------|----------------|----------------------------------------------------------------------------------------|
| <i>Astragalus nuttallii</i> (Torr. & A.Gray)<br>J.T.Howell.            | Leguminosae    | Accepted                                                                               |
| <i>Astragalus tennesseensis</i> Chapman.                               | Leguminosae    | Accepted                                                                               |
| <i>Astragalus crassicaarpus</i> Nutt.                                  | Leguminosae    | Accepted                                                                               |
| <i>Athamanta cretensis</i> L.                                          | Apiaceae       | Accepted                                                                               |
| <i>Atrichum undulatum</i> (Hedw.) P.<br>Beauv.                         | Polytrichaceae | Accepted                                                                               |
| <i>Atriplex confertifolia</i> (Torr. & Frém.)<br>S.Watson.             | Amaranthaceae  | Accepted                                                                               |
| <i>Atriplex halimus</i> L.                                             | Amaranthaceae  | Accepted                                                                               |
| <i>Atriplex lentiformis</i> (Torr.) S.Watson                           | Amaranthaceae  | Accepted                                                                               |
| <i>Atriplex patula</i> L.                                              | Amaranthaceae  | Accepted                                                                               |
| <i>Atriplex portulacoides</i> L.                                       | Amaranthaceae  | Accepted                                                                               |
| <i>Atriplex prostrata</i> Boucher ex DC.                               | Amaranthaceae  | Accepted                                                                               |
| <i>Atriplex semibaccata</i> R.Br.                                      | Amaranthaceae  | Accepted                                                                               |
| <i>Aurinia saxatilis</i> (L.) Desv.                                    | Brassicaceae   | Accepted                                                                               |
| <i>Austroanthonia caespitosa</i>                                       | Poaceae        | Synonym of<br><i>Rytidosperma<br/>caespitosum</i> (Gaudich.)<br>Connor & Edgar.        |
| <i>Austroanthonia carphoides</i> (Benth.)<br>H.P.Linder                | Poaceae        | Synonym of<br><i>Rytidosperma carphoides</i><br>(F.Muell. ex Benth.)<br>Connor & Edgar |
| <i>Austroanthonia setacea</i>                                          | Poaceae        | Synonym of<br><i>Rytidosperma setaceum</i><br>(R.Br.) Connor & Edgar.                  |
| <i>Austrostipa densiflora</i> (Hughes)<br>S.W.L.Jacobs & J.Everett     | Poaceae        | Synonym of <i>Stipa<br/>densiflora</i> Hughes                                          |
| <i>Austrostipa elegantissima</i> (Labill.)<br>S.W.L.Jacobs & J.Everett | Poaceae        | Synonym of <i>Stipa<br/>elegantissima</i> Labill.                                      |
| <i>Austrostipa mollis</i> (R.Br.)<br>S.W.L.Jacobs & J.Everett          | Poaceae        | Synonym of <i>Stipa mollis</i><br>R.Br.                                                |

|                                                     |                |                                                         |
|-----------------------------------------------------|----------------|---------------------------------------------------------|
| <i>Austrostipa scabra</i>                           | Poaceae        | Synonym of <i>Stipa scabra</i> Lindl.                   |
| <i>Avena barbata</i> Pott ex Link.                  | Poaceae        | Accepted                                                |
| <i>Avena sterilis</i> L.                            | Poaceae        | Accepted                                                |
| <i>Avenella flexuosa</i> (L.) Drejer                |                | Synonym of <i>Deschampsia flexuosa</i> (L.) Trin.       |
| <i>Axonopus compressus</i> (Sw.) P.Beauv.           | Poaceae        | Accepted                                                |
| <i>Baccharis pilularis</i> DC.                      | Compositae     | Accepted                                                |
| <i>Baccharis pilularis</i> 'Twin Peaks'             | Compositae     | Variety of <i>Baccharis pilularis</i> DC.               |
| <i>Bacopa monnieri</i> (L.) Wettst.                 | Plantaginaceae | Accepted                                                |
| <i>Baeckea astarteoides</i> Benth.                  | Myrtaceae      | Synonym of <i>Astartea astarteoides</i> (Benth.) Rye    |
| <i>Baileya multiradiata</i> Harv. & A.Gray ex Torr. | Compositae     | Accepted                                                |
| <i>Ballota acetabulosa</i> (L.) Benth.              | Lamiaceae      | Accepted                                                |
| <i>Ballota nigra</i> L.                             | Lamiaceae      | Accepted                                                |
| <i>Banksia baueri</i> R.Br.                         | Proteaceae     | Accepted                                                |
| <i>Banksia nivea</i> Labill.                        | Proteaceae     | Accepted                                                |
| <i>Banksia petiolaris</i> F.Muell.                  | Proteaceae     | Accepted                                                |
| <i>Baptisia alba</i> (L.) Vent.                     | Leguminosae    | Accepted                                                |
| <i>Baptisia australis</i> (L.) R.Br.                | Leguminosae    | Accepted                                                |
| <i>Baptisia tinctoria</i> (L.) Vent.                | Leguminosae    | Accepted                                                |
| <i>Barbarea vulgaris</i> R.Br.                      | Brassicaceae   | Accepted                                                |
| <i>Barleria repens</i> Nees                         | Acanthaceae    | Accepted                                                |
| <i>Bauhinia coccinea</i> (Lour.) DC.                | Leguminosae    | Accepted                                                |
| <i>Bauhinia kockiana</i> Korth.                     | Leguminosae    | Accepted                                                |
| <i>Belamcanda chinensis</i>                         | Iridaceae      | Synonym of <i>Iris domestica</i> (L.) Goldblatt & Mabb. |
| <i>Bellis perennis</i> L.                           | Compositae     | Accepted                                                |

|                                                       |               |                                                                       |
|-------------------------------------------------------|---------------|-----------------------------------------------------------------------|
| <i>Belosynapsis ciliata</i> (Blume)<br>R.S.Rao.       | Commelinaceae | Accepted                                                              |
| <i>Bergenia cordifolia</i>                            | Saxifragaceae | Synonym of <i>Bergenia crassifolia</i> (L.) Fritsch                   |
| <i>Berteroa incana</i> (L.) DC.                       | Brassicaceae  | Accepted                                                              |
| <i>Beta vulgaris</i> L.                               | Amaranthaceae | Accepted                                                              |
| <i>Betula pubescens</i> Ehrh.                         | Betulaceae    | Accepted                                                              |
| <i>Bidens alba</i> (L.) DC.                           | Compositae    | Synonym of <i>Bidens pilosa</i> L.                                    |
| <i>Bidens pilosa</i> L.                               | Compositae    | Accepted                                                              |
| <i>Bidens subalternans</i> DC.                        | Compositae    | Accepted                                                              |
| <i>Biscutella laevigata</i> L.                        | Brassicaceae  | Accepted                                                              |
| <i>Blackstonia perfoliata</i> (L.) Huds.              | Gentianaceae  | Accepted                                                              |
| <i>Blumea mollis</i>                                  | Compositae    | Synonym of <i>Blumea axillaris</i> (Lam.) DC.                         |
| <i>Bossiaea prostrata</i> R.Br.                       | Leguminosae   | Accepted                                                              |
| <i>Bothriospermum zeylanicum</i>                      | Boraginaceae  | Synonym of <i>Bothriospermum tenellum</i> (Hornem.) Fisch. & C.A.Mey. |
| <i>Bougainvillea 'sakura variegata'</i>               | Nyctaginaceae | No results                                                            |
| <i>Bouteloua curtipendula</i> (Michx.) Torr.          | Poaceae       | Accepted                                                              |
| <i>Bouteloua gracilis</i>                             | Poaceae       | Synonym of <i>Chondrosum gracile</i> Kunth.                           |
| <i>Bouteloua hirsuta</i>                              | Poaceae       | Synonym of <i>Chondrosum hirsutum</i> (Lag.) Sweet.                   |
| <i>Bouteloua rigidiseta</i> (Steud.) Hitchc.          | Poaceae       | Accepted                                                              |
| <i>Brachypodium distachyon</i> (L.) P.Beauv.          | Poaceae       | Accepted                                                              |
| <i>Brachypodium phoenicoides</i> (L.) Roem. & Schult. | Poaceae       | Accepted                                                              |

|                                                                           |                  |                                                          |
|---------------------------------------------------------------------------|------------------|----------------------------------------------------------|
| <i>Brachypodium retusum</i> (Pers.)<br>P.Beauv.                           | Poaceae          | Accepted                                                 |
| <i>Brachyscome angustifolia</i> A.Cunn.<br>ex DC.                         | Compositae       | Accepted                                                 |
| <i>Brachyscome basaltica</i> F.Muell.                                     | Compositae       | Accepted                                                 |
| <i>Brachyscome formosa</i> P.S.Short                                      | Compositae       | Accepted                                                 |
| <i>Brachyscome multifida</i> DC.                                          | Compositae       | Accepted                                                 |
| <i>Brachythecium salebrosum</i> (Hoffm.<br>ex F. Weber & D. Mohr) Schimp. | Brachytheciaceae | Accepted                                                 |
| <i>Brassica oleraceae</i> L.                                              | Brassicaceae     | Accepted                                                 |
| <i>Brassica oleracea</i> var. <i>sabauda</i> L.                           | Brassicaceae     | Synonym of <i>Brassica oleracea</i> L.                   |
| <i>Brassica rapa</i> L.                                                   | Brassicaceae     | Accepted                                                 |
| <i>Braya alpina</i> Sternb. & Hoppe                                       | Brassicaceae     | Accepted                                                 |
| <i>Briza maxima</i> L.                                                    | Poaceae          | Accepted                                                 |
| <i>Briza media</i> L.                                                     | Poaceae          | Accepted                                                 |
| <i>Brodiaea coronária</i> (Salisb.) Jeps.                                 | Asparagaceae     | Accepted                                                 |
| <i>Brodiaea hyacinthina</i>                                               | Asparagaceae     | Synonym of <i>Triteleia hyacinthina</i> (Lindl.) Greene. |
| <i>Bromus erectus</i> Huds.                                               | Poaceae          | Accepted                                                 |
| <i>Bromus hordeaceus</i> L.                                               | Poaceae          | Accepted                                                 |
| <i>Bromus inermis</i> Leyss.                                              | Poaceae          | Accepted                                                 |
| <i>Bromus madritensis</i> L.                                              | Poaceae          | Accepted                                                 |
| <i>Bromus rubens</i> L.                                                   | Poaceae          | Accepted                                                 |
| <i>Bromus sterilis</i> L.                                                 | Poaceae          | Accepted                                                 |
| <i>Bromus tectorum</i> L.                                                 | Poaceae          | Accepted                                                 |
| <i>Brunonia australis</i> R.Br.                                           | Goodeniaceae     | Accepted                                                 |
| <i>Bryophyllum daigremontianum</i><br>(Raym.-Hamet & Perrier) A.Berger    | Crassulaceae     | Accepted                                                 |
| <i>Bryophyllum pinnatum</i> (Lam.) Oken.                                  | Crassulaceae     | Accepted                                                 |
| <i>Bryum argenteum</i> Hedw.                                              | Bryaceae         | Accepted                                                 |
| <i>Buchloe dactyloides</i> (Nutt.) Engelm.                                | Poaceae          | Accepted                                                 |

|                                                           |                      |                                                           |
|-----------------------------------------------------------|----------------------|-----------------------------------------------------------|
| <i>Buddleja davidii</i> Franch.                           | Scrophulariaceae     | Accepted                                                  |
| <i>Bulbine bulbosa</i> (R.Br.) Haw.                       | Xanthorrhoeacea<br>e | Accepted                                                  |
| <i>Bulbine caulescens</i> L.                              | Xanthorrhoeacea<br>e | Synonym of <i>Bulbine frutescens</i> (L.) Willd.          |
| <i>Bulbine frutescens</i> (L.) Willd.                     | Xanthorrhoeacea<br>e | Accepted                                                  |
| <i>Bulbine vagans</i> E.M.Watson                          | Xanthorrhoeacea<br>e | Accepted                                                  |
| <i>Bupleurum falcatum</i> L.                              | Apiaceae             | Accepted                                                  |
| <i>Burchardia umbellata</i> R.Br.                         | Colchicaceae         |                                                           |
| <i>Cajanus scarabaeoides</i> (L.) Thouars                 | Leguminosae          | Accepted                                                  |
| <i>Cakile edentula</i> (Bigelow) Hook.                    | Brassicaceae         | Accepted                                                  |
| <i>Calamagrostis</i> × <i>acutiflora</i> (Schräd.)<br>DC. | Poaceae              | Accepted                                                  |
| <i>Calamagrostis brachytricha</i>                         | Poaceae              | Synonym of<br><i>Calamagrostis arundinacea</i> (L.) Roth. |
| <i>Calamagrostis epigejos</i> (L.) Roth.                  | Poaceae              | Accepted                                                  |
| <i>Calamagrostis effusa</i> (Kunth) Steud.                | Poaceae              | Accepted                                                  |
| <i>Calamagrostis pickeringii</i> A.Gray.                  | Poaceae              | Accepted                                                  |
| <i>Calamagrostis stricta</i> (Timm)<br>Koeler.            | Poaceae              | Accepted                                                  |
| <i>Calamintha arkansana</i> (Nutt.)<br>Kuntze.            | Lamiaceae            | Accepted                                                  |
| <i>Calamintha nepeta</i>                                  | Lamiaceae            | Synonym of <i>Clinopodium nepeta</i> (L.) Kuntze.         |
| <i>Calandrinia polyandra</i> Benth.                       | Portulacaceae        | Accepted                                                  |
| <i>Calendula arvensis</i> M.Bieb.                         | Compositae           | Accepted                                                  |
| <i>Callirhoe involucrata</i> (Torr. &<br>A.Gray) A.Gray.  | Malvaceae            | Accepted                                                  |
| <i>Callisia fragrans</i> (Lindl.) Woodson.                | Commelinaceae        | Accepted                                                  |
| <i>Callisia repens</i> (Jacq.) L.                         | Commelinaceae        | Accepted                                                  |

|                                                               |                |                                              |
|---------------------------------------------------------------|----------------|----------------------------------------------|
| <i>Callisia warszewicziana</i> (Kunth & C.D.Bouché) D.R.Hunt. | Commelinaceae  | Accepted                                     |
| <i>Callistemon citrinus</i> (Curtis) Skeels                   | Myrtaceae      | Accepted                                     |
| <i>Calocephalus citreus</i> Less.                             | Compositae     | Accepted                                     |
| <i>Calothamnus graniticus</i><br>Hawkeswood                   | Myrtaceae      | Accepted                                     |
| <i>Calothamnus hirsutus</i> Hawkeswood                        | Myrtaceae      | Accepted                                     |
| <i>Calylophus hartwegii</i> (Benth.)<br>P.H.Raven             | Onagraceae     | Accepted                                     |
| <i>Calystegia sepium</i> (L.) R. Br.                          | Convolvulaceae | Accepted                                     |
| <i>Calytrix tetragona</i> Labill.                             | Myrtaceae      | Accepted                                     |
| <i>Camassia quamash</i> (Pursh) Greene.                       | Asparagaceae   | Accepted                                     |
| <i>Campanula americana</i> L.                                 | Campanulaceae  | Accepted                                     |
| <i>Campanula cochleariifolia</i> Lam.                         | Campanulaceae  | Accepted                                     |
| <i>Campanula glomerata</i> L.                                 | Campanulaceae  | Accepted                                     |
| <i>Campanula incurva</i> Aucher ex<br>A.DC.                   | Campanulaceae  | Accepted                                     |
| <i>Campanula kemulariae</i>                                   | Campanulaceae  | Synonym of <i>Campanula raddeana</i> Trautv. |
| <i>Campanula persicifolia</i> L.                              | Campanulaceae  | Accepted                                     |
| <i>Campanula portenschlagiana</i> Schult.                     | Campanulaceae  | Accepted                                     |
| <i>Campanula poscharskyana</i> Degen.                         | Campanulaceae  | Accepted                                     |
| <i>Campanula rotundifolia</i> L.                              | Campanulaceae  | Accepted                                     |
| <i>Campanula spicata</i> L.                                   | Campanulaceae  | Accepted                                     |
| <i>Campanula trachelium</i> L.                                | Campanulaceae  | Accepted                                     |
| <i>Campanulastrum americanum</i>                              | Campanulaceae  | Synonym of <i>Campanula americana</i> L.     |
| <i>Canna indica</i> L.                                        | Cannaceae      | Accepted                                     |
| <i>Capsella bursa-pastoris</i> (L.) Medik.                    | Brassicaceae   | Accepted                                     |
| <i>Capsicum annuum</i> L.                                     | Solanaceae     | Accepted                                     |
| <i>Cardamine flexuosa</i> With.                               | Brassicaceae   | Accepted                                     |
| <i>Cardamine hirsuta</i> L.                                   | Brassicaceae   | Accepted                                     |
| <i>Carex alba</i> Scop.                                       | Cyperaceae     | Accepted                                     |



|                                                            |            |                                                                                         |
|------------------------------------------------------------|------------|-----------------------------------------------------------------------------------------|
| <i>Carex arenaria</i> L.                                   | Cyperaceae | Accepted                                                                                |
| <i>Carex argyranthra</i> Tuck. ex Boott.                   | Cyperaceae | Accepted                                                                                |
| <i>Carex bicknelli</i> Britton & A.Br.                     | Cyperaceae | Accepted                                                                                |
| <i>Carex densa</i> (L.H.Bailey)<br>L.H.Bailey.             | Cyperaceae | Accepted                                                                                |
| <i>Carex eburnea</i> Boott.                                | Cyperaceae | Accepted                                                                                |
| <i>Carex flacca</i> Schreb.                                | Cyperaceae | Accepted                                                                                |
| <i>Carex flagellifera</i> 'Bronzita'                       | Cyperaceae | Variety of <i>Carex flagellifera</i> Colenso                                            |
| <i>Carex glaucoidea</i> Tuck. ex Olney.                    | Cyperaceae | Accepted                                                                                |
| <i>Carex gracillima</i> Schwein.                           | Cyperaceae | Accepted                                                                                |
| <i>Carex halleriana</i> Asso.                              | Cyperaceae | Accepted                                                                                |
| <i>Carex hirta</i> L.                                      | Cyperaceae | Accepted                                                                                |
| <i>Carex inops</i> L.H.Bailey.                             | Cyperaceae | Accepted                                                                                |
| <i>Carex meridiana</i> Akiyama.                            | Cyperaceae | Accepted                                                                                |
| <i>Carex mucronata</i> All.                                | Cyperaceae | Accepted                                                                                |
| <i>Carex muhlenbergii</i> Willd.                           | Cyperaceae | Accepted                                                                                |
| <i>Carex nigra</i> (L.) Reichard.                          | Cyperaceae | Accepted                                                                                |
| <i>Carex oshimensis</i> Nakai.                             | Cyperaceae | Accepted                                                                                |
| <i>Carex pachystachya</i>                                  | Cyperaceae | Synonym of <i>Carex macloviana</i> subsp. <i>pachystachya</i> (Cham. ex Steud.) Hultén. |
| <i>Carex pansa</i> L.H.Bailey                              | Cyperaceae | Accepted                                                                                |
| <i>Carex pensylvanica</i> Lam.                             | Cyperaceae | Accepted                                                                                |
| <i>Carex praegracilis</i> W.Boott.                         | Cyperaceae | Accepted                                                                                |
| <i>Carex radiata</i> (Wahlenb.) Small.                     | Cyperaceae | Accepted                                                                                |
| <i>Carex retroflexa</i> Muhl. ex Willd.                    | Cyperaceae | Accepted                                                                                |
| <i>Carex sprengelii</i> Dewey ex Spreng.                   | Cyperaceae | Accepted                                                                                |
| <i>Carex sylvatica</i> Huds.                               | Cyperaceae | Accepted                                                                                |
| <i>Carex texensis</i> (Torr. ex L.H.Bailey)<br>L.H.Bailey. | Cyperaceae | Accepted                                                                                |
| <i>Carex tumulicola</i> Mack.                              | Cyperaceae | Accepted                                                                                |

|                                                                                  |               |                                                                   |
|----------------------------------------------------------------------------------|---------------|-------------------------------------------------------------------|
| <i>Carex vulpinoidea</i> Michx.                                                  | Cyperaceae    | Accepted                                                          |
| <i>Carpinus betulus</i> L.                                                       | Betulaceae    | Accepted                                                          |
| <i>Carpobrotus acinaciformis</i> (L.)<br>L.Bolus.                                | Aizoaceae     | Accepted                                                          |
| <i>Carpobrotus edulis</i> (L.) N.E.Br.                                           | Aizoaceae     | Accepted                                                          |
| <i>Carpobrotus glaucescens</i> (Haw.)<br>Schwantes                               | Aizoaceae     | Accepted                                                          |
| <i>Carpobrotus modestus</i> S.T.Blake.                                           | Aizoaceae     | Accepted                                                          |
| <i>Carpobrotus rossii</i> (Haw.)<br>Schwantes.                                   | Aizoaceae     | Accepted                                                          |
| <i>Carthamus carduncellus</i> L.                                                 | Compositae    | Accepted                                                          |
| <i>Cassia fasciculata</i>                                                        | Leguminosae   | Synonym of<br><i>Chamaecrista fasciculata</i><br>(Michx.) Greene. |
| <i>Castilleja coccínea</i> (L.) Spreng.                                          | Orobanchaceae | Accepted                                                          |
| <i>Castilleja integra</i> A.Gray.                                                | Orobanchaceae | Accepted                                                          |
| <i>Catapodium rigidum</i> (L.) C.E.Hubb.                                         | Poaceae       | Accepted                                                          |
| <i>Catharanthus roseus</i> (L.) G.Don.                                           | Apocynaceae   | Accepted                                                          |
| <i>Ceanothus american</i> Us L.                                                  | Rhamnaceae    | Accepted                                                          |
| <i>Ceanothus maritimus</i> Hoover.                                               | Rhamnaceae    | Accepted                                                          |
| <i>Ceanothus thyrsiflorus</i> var. <i>griseus</i><br>(Trel. ex B.L.Rob.) McMinn. | Rhamnaceae    | Accepted                                                          |
| <i>Celtis australis</i> L.                                                       | Cannabaceae   | Accepted                                                          |
| <i>Celtis sinensis</i> Pers.                                                     | Cannabaceae   | Accepted                                                          |
| <i>Celosia argentea</i> L.                                                       | Amaranthaceae | Accepted                                                          |
| <i>Centaurea cyanus</i>                                                          | Compositae    | Synonym of <i>Cyanus</i><br><i>segetum</i> Hill.                  |
| <i>Centaurea jacea</i> L.                                                        | Compositae    | Accepted                                                          |
| <i>Centaurea nigra</i> L.                                                        | Compositae    | Accepted                                                          |
| <i>Centaurea scabiosa</i> L.                                                     | Compositae    | Accepted                                                          |
| <i>Centaurium erythraea</i> Rafn.                                                | Gentianaceae  | Accepted                                                          |
| <i>Centella asiática</i> (L.) Urb.                                               | Apiaceae      | Accepted                                                          |

|                                                                             |                  |                                                                               |
|-----------------------------------------------------------------------------|------------------|-------------------------------------------------------------------------------|
| <i>Centipeda mínima</i> (L.) A.Braun & Asch.                                | Compositae       | Accepted                                                                      |
| <i>Centranthus calcitrapa</i> (L.) Dufr.                                    | Caprifoliaceae   | Accepted                                                                      |
| <i>Centranthus macrosiphon</i> Boiss                                        | Caprifoliaceae   | Accepted                                                                      |
| <i>Centranthus ruber</i> (L.) DC.                                           | Caprifoliaceae   | Accepted                                                                      |
| <i>Centranthus ruber subsp. sibthorpii</i> (Heldr. & Sart. ex Boiss.) Hayek | Caprifoliaceae   | Accepted                                                                      |
| <i>Cephalotaxus harringtonii</i> (Knight ex J.Forbes) K.Koch                | Taxaceae         | Accepted                                                                      |
| <i>Cerastium alpinum</i> L.                                                 | Caryophyllaceae  | Accepted                                                                      |
| <i>Cerastium arvense</i> L.                                                 | Caryophyllaceae  | Accepted                                                                      |
| <i>Cerastium biebersteinii</i> DC.                                          | Caryophyllaceae  | Accepted                                                                      |
| <i>Cerastium fontanum</i> Baumg.                                            | Caryophyllaceae  | Accepted                                                                      |
| <i>Cerastium fontanum subsp. vulgare</i> (Hartm.) Greuter & Burdet.         | Caryophyllaceae  | Accepted                                                                      |
| <i>Cerastium glomeratum</i> Thuill.                                         | Caryophyllaceae  | Accepted                                                                      |
| <i>Cerastium holosteoides</i> Fr.                                           | Caryophyllaceae  | Synonym of <i>Cerastium fontanum subsp. vulgare</i> (Hartm.) Greuter & Burdet |
| <i>Cerastium pumilum</i> Curtis.                                            | Caryophyllaceae  | Accepted                                                                      |
| <i>Cerastium pumilum var. glutinosum</i> (Čelak.) E.Rico.                   | Caryophyllaceae  | Accepted                                                                      |
| <i>Cerastium semidecandrum</i> L.                                           | Caryophyllaceae  | Accepted                                                                      |
| <i>Cerastium tomentosum</i> L.                                              | Caryophyllaceae  | Accepted                                                                      |
| <i>Cerastium velutinum</i> Raf.                                             | Caryophyllaceae  | Accepted                                                                      |
| <i>Cerastium velutinum var. villosissimum</i> (Pennell) J.K.Morton.         | Caryophyllaceae  | Accepted                                                                      |
| <i>Cerastium vulgatum</i>                                                   | Caryophyllaceae  | Synonym of <i>Cerastium glomeratum</i> Thuill.                                |
| <i>Ceratophyllum demersum</i> L.                                            | Ceratophyllaceae | Accepted                                                                      |
| <i>Ceratodon purpureus</i> (Hedw.) Brid.                                    | Ditrichaceae     | Accepted                                                                      |
| <i>Cercocarpus breviflorus</i>                                              | Rosaceae         | Unresolved                                                                    |

|                                                            |                |                                                                 |
|------------------------------------------------------------|----------------|-----------------------------------------------------------------|
| <i>Ceterach officinarum</i> Willd.                         | Aspleniaceae   | Accepted                                                        |
| <i>Chaetosciadium trichospermum</i> (L.) Boiss.            | Apiaceae       | Accepted                                                        |
| <i>Chamaebatiaria millefolium</i> (Torr.) Maxim.           | Rosaceae       | Accepted                                                        |
| <i>Chamaecrista fasciculata</i> (Michx.) Greene.           | Leguminosae    | Accepted                                                        |
| <i>Chamaedorea seifrizii</i> Burret.                       | Arecaceae      | Accepted                                                        |
| <i>Chamaemelum nobile</i> (L.) All.                        | Compositae     | Accepted                                                        |
| <i>Chamaesyce maculata</i>                                 | Euphorbiaceae  | Synonym of <i>Euphorbia maculata</i> L.                         |
| <i>Chamelaucium ciliatum</i> Desf.                         | Myrtaceae      | Accepted                                                        |
| <i>Chamomilla recutita</i>                                 | Compositae     | Synonym of <i>Matricaria chamomilla</i> L.                      |
| <i>Chasmanthium latifolium</i> (Michx.) H.O.Yates          | Poaceae        | Accepted                                                        |
| <i>Cheilanthes austrotenuifolia</i> H.Quirk & T.C.Chambers |                | Unresolved                                                      |
| <i>Cheiranthra linearis</i> A.Cunn. ex Lindl.              | Pittosporaceae | Accepted                                                        |
| <i>Chelidonium majus</i> L.                                | Papaverceae    | Accepted                                                        |
| <i>Chenopodium album</i> L.                                | Amaranthaceae  | Accepted                                                        |
| <i>Chenopodium carinatum</i> R.Br.                         | Amaranthaceae  | Unresolved                                                      |
| <i>Chenopodium pumilio</i> R.Br.                           | Amaranthaceae  | Synonym of <i>Dysphania pumilio</i> (R.Br.) Mosyakin & Clemants |
| <i>Chilopsis linearis</i> (Cav.) Sweet.                    | Bignoniaceae   | Accepted                                                        |
| <i>Chloris gayana</i> Kunth                                | Poaceae        | Accepted                                                        |
| <i>Chloris halophila</i> Parodi                            | Poaceae        | Accepted                                                        |
| <i>Chloris truncata</i> R.Br.                              | Poaceae        | Accepted                                                        |
| <i>Chlorophytum comosum</i> (Thunb.) Jacques               | Asparagaceae   | Accepted                                                        |
| <i>Chrysactinia mexicana</i> A.Gray.                       | Compositae     | Accepted                                                        |

|                                                            |              |                                                            |
|------------------------------------------------------------|--------------|------------------------------------------------------------|
| <i>Chrysanthemum</i> × <i>morifolium</i><br>'Golden times' | Compositae   | Unresolved                                                 |
| <i>Chrysanthemum coronarium</i>                            | Compositae   | Synonym of <i>Glebionis coronaria</i> (L.) Cass. ex Spach. |
| <i>Chrysanthemum myconis</i>                               | Compositae   | Synonym of <i>Coleostephus myconis</i> (L.) Rchb.f.        |
| <i>Chrysanthemum pacificum</i>                             | Compositae   | Synonym of <i>Dendranthema pacificum</i> (Nakai) Kitam.    |
| <i>Chrysanthemum segetum</i>                               | Compositae   | Synonym of <i>Glebionis segetum</i> (L.) Fourr.            |
| <i>Chrysanthemum weyrichii</i>                             | Compositae   | Unresolved                                                 |
| <i>Chrysocephalum apiculatum</i><br>(Labill.) Steetz.      | Compositae   | Accepted                                                   |
| <i>Chrysocephalum semipapposum</i><br>(Labill.) Steetz.    | Compositae   | Accepted                                                   |
| <i>Chrysothemis pulchella</i> (Donn ex Sims) Decne.        | Gesneriaceae | Accepted                                                   |
| <i>Chrysopogon zizanioides</i> (L.)<br>Roberty.            | Poaceae      | Accepted                                                   |
| <i>Chrysopsis villosa</i>                                  | Compositae   | Synonym of <i>Heterotheca villosa</i> (Pursh) Shinnars.    |
| <i>Cicer arietinum</i> L.                                  | Leguminosae  | Accepted                                                   |
| <i>Cichorium endívia</i> L.                                | Compositae   | Accepted                                                   |
| <i>Cichorium intybus</i> L.                                | Compositae   | Accepted                                                   |
| <i>Cichorium pumilum</i> Jacq.                             | Compositae   | Accepted                                                   |
| <i>Cirsium arvense</i> (L.) Scop.                          | Compositae   | Accepted                                                   |
| <i>Cirsium helenioides</i> (L.) Hill                       | Compositae   | Accepted                                                   |
| <i>Cirsium horridulum</i> Michx.                           | Compositae   | Accepted                                                   |
| <i>Cirsium vulgare</i> (Savi) Ten.                         | Compositae   | Accepted                                                   |
| <i>Cissus nodosa</i> Blume                                 | Vitaceae     | Accepted                                                   |
| <i>Cistus creticus</i> L.                                  | Cistaceae    | Accepted                                                   |

|                                                                           |                |                                                                 |
|---------------------------------------------------------------------------|----------------|-----------------------------------------------------------------|
| <i>Cistus salviifolius</i> L.                                             | Cistaceae      | Accepted                                                        |
| <i>Citrus hystrix</i> DC.                                                 | Rutaceae       | Accepted                                                        |
| <i>Citrus</i> × <i>latifolia</i> (Yu.Tanaka)<br>Yu.Tanaka                 | Rutaceae       | Accepted                                                        |
| <i>Citrus limon</i> (L.) Osbeck                                           | Rutaceae       | Accepted                                                        |
| <i>Citrus sinensis</i> (L.) Osbeck                                        | Rutaceae       | Accepted                                                        |
| <i>Cladanthus mixtus</i> (L.) Oberpr. &<br>Vogt.                          | Compositae     | Accepted                                                        |
| <i>Clematis columbiana</i> var. <i>tenuiloba</i><br>(A.Gray) J.S.Pringle. | Ranunculaceae  | Accepted                                                        |
| <i>Clinopodium acinos</i> (L.) Kuntze.                                    | Lamiaceae      | Accepted                                                        |
| <i>Clinopodium alpinum</i> (L.) Kuntze.                                   | Lamiaceae      | Accepted                                                        |
| <i>Clinopodium chinense</i> (Benth.)<br>Kuntze.                           | Lamiaceae      | Accepted                                                        |
| <i>Clinopodium douglasii</i>                                              | Lamiaceae      | Synonym of <i>Micromeria douglasii</i> Benth.                   |
| <i>Clinopodium nepeta</i> (L.) Kuntze.                                    | Lamiaceae      | Accepted                                                        |
| <i>Clinopodium vulgare</i> L.                                             | Lamiaceae      | Accepted                                                        |
| <i>Codiaeum variegatum</i> (L.) Rumph.<br>ex A.Juss.                      | Euphorbiaceae  | Accepted                                                        |
| <i>Codiaeum variegatum</i> var. <i>pictum</i>                             | Euphorbiaceae  | Synonym of <i>Codiaeum variegatum</i> (L.) Rumph.<br>ex A.Juss. |
| <i>Colchicum autumnale</i> L.                                             | Colchicaceae   | Accepted                                                        |
| <i>Collinsia grandiflora</i> Douglas ex<br>Lindl.                         | Plantaginaceae | Accepted                                                        |
| <i>Comandra umbellata</i> (L.) Nutt.                                      | Santalaceae    | Accepted                                                        |
| <i>Commelina communis</i> L.                                              | Commelinaceae  | Accepted                                                        |
| <i>Commelina erecta</i> L.                                                | Commelinaceae  | Accepted                                                        |
| <i>Complaya trilobata</i>                                                 | Compositae     | Synonym of<br><i>Sphagneticola trilobata</i><br>(L.) Pruski.    |
| <i>Conostylis candicans</i> Endl.                                         | Haemodoraceae  | Accepted                                                        |

|                                                          |                |                                                    |
|----------------------------------------------------------|----------------|----------------------------------------------------|
| <i>Consolida regalis</i> Gray                            | Ranunculaceae  | Accepted                                           |
| <i>Convolvulus angustissimus</i> R. Br.                  | Convolvulaceae | Accepted                                           |
| <i>Convolvulus arvensis</i> L.                           | Convolvulaceae | Accepted                                           |
| <i>Convolvulus cantabricus</i>                           | Convolvulaceae | Unresolved                                         |
| <i>Convolvulus cneorum</i>                               | Convolvulaceae | Unresolved                                         |
| <i>Convolvulus mauritanicus</i>                          | Convolvulaceae | Unresolved                                         |
| <i>Convolvulus sabatius</i> Viv.                         | Convolvulaceae | Unresolved                                         |
| <i>Convolvulus tricolor</i> L.                           | Convolvulaceae | Accepted                                           |
| <i>Conyza blakei</i> (Cabrera) Cabrera                   | Compositae     | Synonym of <i>Erigeron blakei</i> Cabrera          |
| <i>Conyza bonariensis</i>                                | Compositae     | Synonym of <i>Erigeron bonariensis</i> L.          |
| <i>Conyza canadensis</i>                                 | Compositae     | Synonym of <i>Erigeron canadensis</i> L.           |
| <i>Conyza sumatrensis</i> (S.F.Blake) Pruski & G.Sancho. | Compositae     | Accepted                                           |
| <i>Coprosma acerosa</i> A.Cunn.                          | Rubiaceae      | Accepted                                           |
| <i>Cordyline fruticosa</i> (L.) A.Chev.                  | Asparagaceae   | Accepted                                           |
| <i>Cordyline fruticosa</i> 'Firebrand'                   | Asparagaceae   | Variety of <i>Cordyline fruticosa</i> (L.) A.Chev. |
| <i>Coreopsis auriculata</i> L.                           | Compositae     | Accepted                                           |
| <i>Coreopsis grandiflora</i> Hogg ex Sweet               | Compositae     | Accepted                                           |
| <i>Coreopsis lanceolata</i> L.                           | Compositae     | Accepted                                           |
| <i>Coreopsis palmata</i> Nutt.                           | Compositae     | Accepted                                           |
| <i>Coreopsis rosea</i> Nutt.                             | Compositae     | Accepted                                           |
| <i>Coreopsis tinctoria</i> Nutt.                         | Compositae     | Accepted                                           |
| <i>Corethrogyne filaginifolia</i> (Hook. & Arn.) Nutt.   | Compositae     | Accepted                                           |
| <i>Coriandrum sativum</i> L.                             | Apiaceae       | Accepted                                           |
| <i>Coris monspeliensis</i> L.                            | Primulaceae    | Accepted                                           |
| <i>Cornus florida</i> L.                                 | Cornaceae      | Accepted                                           |
| <i>Cornus mas</i> L.                                     | Cornaceae      | Accepted                                           |

|                                                                    |               |                                                                                |
|--------------------------------------------------------------------|---------------|--------------------------------------------------------------------------------|
| <i>Coronilla varia</i>                                             | Leguminosae   | Synonym of <i>Securigera varia</i> (L.) Lassen.                                |
| <i>Correa alba</i> Andrews                                         | Rutaceae      | Accepted                                                                       |
| <i>Correa glabra</i> Lindl.                                        | Rutaceae      | Accepted                                                                       |
| <i>Correa reflexa</i> (Labill.) Vent.                              | Rutaceae      | Accepted                                                                       |
| <i>Corylus avellana</i> L.                                         | Betulaceae    | Accepted                                                                       |
| <i>Corynephorus canescens</i> (L.)<br>P.Beauv.                     | Poaceae       | Accepted                                                                       |
| <i>Cosmos bipinnatus</i> Cav.                                      | Compositae    | Accepted                                                                       |
| <i>Cota tinctoria</i> (L.) J.Gay                                   | Compositae    | Accepted                                                                       |
| <i>Cotinus coggigrya</i> Scop.                                     | Anacardiaceae | Accepted                                                                       |
| <i>Cotoneaster franchetii</i> Bois.                                | Rosaceae      | Accepted                                                                       |
| <i>Cotula hispida</i> (DC.) Harv.                                  | Compositae    | Accepted                                                                       |
| <i>Cotula squalida</i> (Hook.f.) Hook.f.                           | Compositae    | Accepted                                                                       |
| <i>Cotyledon orbiculata</i> L.                                     | Crassulaceae  | Accepted                                                                       |
| <i>Craspedia variabilis</i> J.Everett &<br>Doust                   | Compositae    | Accepted                                                                       |
| <i>Crassula helmsii</i> (Kirk) Cockayne                            | Crassulaceae  | Accepted                                                                       |
| <i>Crassula multicava</i> Lem.                                     | Crassulaceae  | Accepted                                                                       |
| <i>Crassula muscosa</i> L.                                         | Crassulaceae  | Accepted                                                                       |
| <i>Crassula ovata</i> (Mill.) Druce.                               | Crassulaceae  | Accepted                                                                       |
| <i>Crassula tillaea</i> Lest.-Garl.                                | Crassulaceae  | Accepted                                                                       |
| <i>Crassula falcata</i> J.C.Wendl.                                 | Crassulaceae  | Synonym of <i>Crassula perfoliata</i> var. <i>falcata</i> (J.C.Wendl.) Toelken |
| <i>Crataegus laevigata</i> (Poir.) DC.                             | Rosaceae      | Accepted                                                                       |
| <i>Crataegus monogyna</i> Jacq.                                    | Rosaceae      | Accepted                                                                       |
| <i>Crepidiastrum keiskeanum</i> (Maxim.)                           | Compositae    | Accepted                                                                       |
| <i>Crepis bursifolia</i> L.                                        | Compositae    | Accepted                                                                       |
| <i>Crepis capillaris</i> (L.) Wallr.                               | Compositae    | Accepted                                                                       |
| <i>Crepis foetida</i> ssp. <i>rhoeadifolia</i><br>(M.Bieb.) Čelak. | Compositae    | Accepted                                                                       |
| <i>Crepis tectorum</i> L.                                          | Compositae    | Accepted                                                                       |



|                                                            |               |                                                         |
|------------------------------------------------------------|---------------|---------------------------------------------------------|
| <i>Crithmum maritimum</i>                                  | Apiaceae      | Unresolved                                              |
| <i>Crocus minimus</i> DC.                                  | Iridaceae     | Accepted                                                |
| <i>Crocus sativus</i> L.                                   | Iridaceae     | Accepted                                                |
| <i>Crocus sieberi</i> J.Gay.                               | Iridaceae     | Accepted                                                |
| <i>Crocus tommasinianus</i> Herb.                          | Iridaceae     | Accepted                                                |
| <i>Crocus vernus</i> (L.) Hill                             | Iridaceae     | Accepted                                                |
| <i>Crossostephium chinense</i> (A.Gray ex L.) Makino.      | Compositae    | Accepted                                                |
| <i>Crotalaria verrucosa</i> L.                             | Leguminosae   | Accepted                                                |
| <i>Chrysanthellum indicum</i> DC.                          | Compositae    | Accepted                                                |
| <i>Chrysanthemum morifolium</i> Ramat.                     | Compositae    | Accepted                                                |
| <i>Cucumis sativus</i> L.                                  | Cucurbitaceae | Accepted                                                |
| <i>Cucurbita maxima</i> Duchesne                           | Cucurbitaceae | Accepted                                                |
| <i>Cullen tenax</i> (Lindl.) J.W.Grimes                    | Leguminosae   | Unresolved                                              |
| <i>Cuphea hyssopifolia</i> Kunth                           | Lythraceae    | Accepted                                                |
| <i>Cuphea viscosissima</i> Jacq.                           | Lythraceae    | Accepted                                                |
| <i>Curcuma longa</i> L.                                    | Zingiberaceae | Accepted                                                |
| <i>Cyanotis obtusa</i> (Trimen) Trimen                     | Commelinaceae | Accepted                                                |
| <i>Cyanus segetum</i> Hill.                                | Compositae    | Accepted                                                |
| <i>Cyathula prostrata</i> (L.) Blume.                      | Amaranthaceae | Accepted                                                |
| <i>Cycas revoluta</i> Thunb.                               | Cycadaceae    | Accepted                                                |
| <i>Cyclanthera pedata</i> (L.) Schrad.                     | Cucurbitacea  | Accepted                                                |
| <i>Cymbopogon ambiguus</i> (Hack.)<br>A.Camus              | Poaceae       | Accepted                                                |
| <i>Cymbopogon citratus</i> (DC.) Stapf.                    | Poaceae       | Accepted                                                |
| <i>Cymbopogon parkeri</i>                                  | Poaceae       | Synonym of <i>Cymbopogon commutatus</i> (Steud.) Stapf. |
| <i>Cynara cardunculus</i> L.                               | Compositae    | Accepted                                                |
| <i>Cynara cardunculus</i> var. <i>scolymus</i> (L.) Benth. | Compositae    | Synonym of <i>Cynara cardunculus</i> L.                 |
| <i>Cynodon dactylon</i> (L.) Pers.                         | Poaceae       | Accepted                                                |

|                                                               |                  |                                         |
|---------------------------------------------------------------|------------------|-----------------------------------------|
| <i>Cynodon dactylon</i> x <i>C. transvaalensis</i> Burt Davy. | Poaceae          | Hybrid                                  |
| <i>Cynosurus cristatus</i> L.                                 | Poaceae          | Accepted                                |
| <i>Cyperus aggregatus</i> (Willd.) Endl.                      | Cyperaceae       | Accepted                                |
| <i>Cyperus alternifolius</i> L.                               | Cyperaceae       | Accepted                                |
| <i>Cyperus compressus</i> L.                                  | Cyperaceae       | Accepted                                |
| <i>Cyperus difformis</i> L.                                   | Cyperaceae       | Accepted                                |
| <i>Cyperus haspan</i> L.                                      | Cyperaceae       | Accepted                                |
| <i>Cyperus iria</i> L.                                        | Cyperaceae       | Accepted                                |
| <i>Cyperus javanicus</i> Houtt.                               | Cyperaceae       | Accepted                                |
| <i>Cyperus lupulinus</i> (Spreng.) Marcks.                    | Cyperaceae       | Accepted                                |
| <i>Cyperus rotundus</i> L.                                    | Cyperaceae       | Accepted                                |
| <i>Cyperus strigosus</i> L.                                   | Cyperaceae       | Accepted                                |
| <i>Cyrtomium falcatum</i> subsp. <i>littorale</i>             | Dryopteridaceae  | No results                              |
| <i>Cystopteris fragilis</i> (L.) Bernh.                       | Cystopteridaceae | Accepted                                |
| <i>Cytisus purgans</i> (L.) Spach.                            | Leguminosae      | Accepted                                |
| <i>Dactylis glomerata</i> L.                                  | Poaceae          | Accepted                                |
| <i>Dactylis polygama</i> Horv.                                | Poaceae          | Synonym of <i>Dactylis glomerata</i> L. |
| <i>Dactylorhiza majalis</i> (Rchb.) P.F.Hunt & Summerh.       | Orchidaceae      | Accepted                                |
| <i>Dalbergia balansae</i> Prain.                              | Leguminosae      | Accepted                                |
| <i>Dalea candida</i> Willd.                                   | Leguminosae      | Accepted                                |
| <i>Dalea greggii</i> A.Gray.                                  | Leguminosae      | Accepted                                |
| <i>Dalea purpurea</i> Vent.                                   | Leguminosae      | Accepted                                |
| <i>Dalea villosa</i> (Nutt.) Spreng.                          | Leguminosae      | Accepted                                |
| <i>Dampiera diversifolia</i> de Vriese.                       | Goodeniaceae     | Accepted                                |
| <i>Dampiera teres</i> Lindl.                                  | Goodeniaceae     | Accepted                                |
| <i>Danthonia spicata</i> (L.) Roem. & Schult.                 | Poaceae          | Accepted                                |
| <i>Darwinia citriodora</i> (Endl.) Benth.                     | Myrtaceae        | Accepted                                |
| <i>Darwinia meeboldii</i> C.A.Gardner                         | Myrtaceae        | Accepted                                |

|                                                                  |                |                                                                                             |
|------------------------------------------------------------------|----------------|---------------------------------------------------------------------------------------------|
| <i>Darwinia taxifolia</i> subsp.<br><i>macrolaena</i> B.G.Briggs | Myrtaceae      | Synonym of <i>Darwinia taxifolia</i> A.Cunn.                                                |
| <i>Daucus broteroi</i> Ten.                                      | Apiaceae       | Accepted                                                                                    |
| <i>Daucus carota</i> L.                                          | Apiaceae       | Accepted                                                                                    |
| <i>Daucus carota</i> subsp. <i>sativus</i><br>(Hoffm.) Arcang.   | Apiaceae       | Accepted                                                                                    |
| <i>Daviesia ulicifolia</i> C.R.P.Andrews.                        | Leguminosae    | Accepted                                                                                    |
| <i>Delosperma ashtonii</i> L.Bolus.                              | Aizoaceae      | Accepted                                                                                    |
| <i>Delosperma basuticum</i> L.Bolus                              | Aizoaceae      | Accepted                                                                                    |
| <i>Delosperma cooperi</i> (Hook.f.)<br>L.Bolus.                  | Aizoaceae      | Accepted                                                                                    |
| <i>Delosperma cooperi</i> 'Kelaidis'                             | Aizoaceae      | Cultivar of <i>Delosperma cooperi</i> (Hook.f.)<br>L.Bolus.                                 |
| <i>Delosperma cooperi</i> 'Tiffindell<br>Magenta'                | Aizoaceae      | Cultivar of <i>Delosperma cooperi</i> (Hook.f.)<br>L.Bolus.                                 |
| <i>Delosperma dyeri</i> L.Bolus                                  | Aizoaceae      | Accepted                                                                                    |
| <i>Delosperma ecklonis</i> var. <i>latifolia</i>                 | Aizoaceae      | No results                                                                                  |
| <i>Delosperma nubigenum</i> (Schltr.)<br>L.Bolus.                | Aizoaceae      | Accepted                                                                                    |
| <i>Delosperma ousberg</i>                                        | Aizoaceae      | No results                                                                                  |
| <i>Delosperma sutherlandii</i> (Hook.f.)<br>N.E.Br.              | Aizoaceae      | Accepted                                                                                    |
| <i>Delphinium virescens</i>                                      | Ranunculaceae  | Synonym of <i>Delphinium carolinianum</i> subsp.<br><i>virescens</i> (Nutt.)<br>R.E.Brooks. |
| <i>Derwentia derwentiana</i>                                     | Plantaginaceae | Synonym of <i>Veronica derwentiana</i> Andrews.                                             |
| <i>Derwentia perfoliata</i>                                      | Plantaginaceae | Synonym of <i>Veronica perfoliata</i> R.Br.                                                 |
| <i>Deschampsia cespitosa</i> (L.) P.Beauv.                       | Poaceae        | Accepted                                                                                    |

|                                                   |                  |                                                                                       |
|---------------------------------------------------|------------------|---------------------------------------------------------------------------------------|
| <i>Deschampsia flexuosa</i> (L.) Trin.            | Poaceae          | Accepted                                                                              |
| <i>Deschampsia holciformis</i>                    | Poaceae          | Synonym of <i>Deschampsia cespitosa</i> subsp. <i>holciformis</i> (J.Presl) W.E.Lawr. |
| <i>Desmanthus illinoensis</i> (Michx.) MacMill.   | Leguminosae      | Accepted                                                                              |
| <i>Desmodium canadense</i> (L.) DC.               | Leguminosae      | Accepted                                                                              |
| <i>Desmodium gangeticum</i> (L.) DC.              | Leguminosae      | Accepted                                                                              |
| <i>Desmodium marilandicum</i> Darl.               | Leguminosae      | Accepted                                                                              |
| <i>Desmodium paniculatum</i> (L.) DC.             | Leguminosae      | Accepted                                                                              |
| <i>Desmodium triflorum</i> (L.) DC.               | Leguminosae      | Accepted                                                                              |
| <i>Deyeuxia quadriseta</i> (Labill.) Benth.       | Poaceae          | Synonym of <i>Calamagrostis quadriseta</i> (Labill.) Spreng.                          |
| <i>Dianella admixta</i>                           | Xanthorrhoeaceae | Synonym of <i>Dianella revoluta</i> R.Br.                                             |
| <i>Dianella caerulea</i> 'Breeze Sims.            | Xanthorrhoeaceae | Accepted                                                                              |
| <i>Dianella ensifolia</i> (L.) DC.                | Xanthorrhoeaceae | Accepted                                                                              |
| <i>Dianella ensifolia</i> cv. 'Silvery Stripe     | Xanthorrhoeaceae | No results                                                                            |
| <i>Dianella revoluta</i> R.Br.                    | Xanthorrhoeaceae | Accepted                                                                              |
| <i>Dianthus anatolicus</i> Boiss.                 | Caryophyllaceae  | Accepted                                                                              |
| <i>Dianthus arenarius</i> L.                      | Caryophyllaceae  | Accepted                                                                              |
| <i>Dianthus armeria</i> L.                        | Caryophyllaceae  | Accepted                                                                              |
| <i>Dianthus carthusianorum</i> L.                 | Caryophyllaceae  | Accepted                                                                              |
| <i>Dianthus deltoides</i> L.                      | Caryophyllaceae  | Accepted                                                                              |
| <i>Dianthus fruticosus</i> sub. <i>fruticosus</i> | Caryophyllaceae  | No results                                                                            |
| <i>Dianthus gratianopolitanus</i> Vill.           | Caryophyllaceae  | Accepted                                                                              |
| <i>Dianthus hyssopifolius</i> L.                  | Caryophyllaceae  | Accepted                                                                              |

|                                                                          |                 |                                                |
|--------------------------------------------------------------------------|-----------------|------------------------------------------------|
| <i>Dianthus pavonius</i> Tausch                                          | Caryophyllaceae | Accepted                                       |
| <i>Dianthus superbus</i> L.                                              | Caryophyllaceae | Accepted                                       |
| <i>Dianthus sylvestris</i> Wulfen.                                       | Caryophyllaceae | Accepted                                       |
| <i>Dichanthelium acuminatum</i>                                          | Poaceae         | Synonym of <i>Panicum acuminatum</i> Sw.       |
| <i>Dichanthelium clandestinum</i>                                        | Poaceae         | Synonym of <i>Panicum clandestinum</i> L.      |
| <i>Dichanthelium dichotomum</i>                                          | Poaceae         | Synonym of <i>Panicum dichotomum</i> L.        |
| <i>Dichanthelium oligosanthos</i> var. <i>scribnerianum</i> (Nash) Gould | Poaceae         | Synonym of <i>Panicum oligosanthos</i> Schult. |
| <i>Dichelachne crinita</i> (L.f.) Hook.f.                                | Poaceae         | Accepted                                       |
| <i>Dichondra argentea</i> Humb. & Bonpl. ex Willd.                       | Convolvulaceae  | Accepted                                       |
| <i>Dichondra repens</i> J.R. Forst. & G. Forst.                          | Convolvulaceae  | Accepted                                       |
| <i>Dicliptera squarrosa</i> Nees                                         | Acanthaceae     | Accepted                                       |
| <i>Dichondra sericea</i> Sw.                                             | Convolvulaceae  | Accepted                                       |
| <i>Dicranoweisia cirrata</i> (Hedw.) Lindb.                              | Dicranaceae     | Accepted                                       |
| <i>Dietes iridioides</i> (L.) Sweet ex Klatt                             | Iridaceae       | Accepted                                       |
| <i>Digitaria ciliaris</i> (Retz.) Koeler                                 | Poaceae         | Accepted                                       |
| <i>Digitaria sanguinalis</i> (L.) Scop.                                  | Poaceae         | Accepted                                       |
| <i>Digitaria setigera</i> Roth.                                          | Poaceae         | Accepted                                       |
| <i>Dillwynia sericea</i> A.Cunn.                                         | Leguminosae     | Accepted                                       |
| <i>Dimeria ornithopoda</i> Trin.                                         | Poaceae         | Accepted                                       |
| <i>Diplolaena grandiflora</i> Desf.                                      | Rutaceae        | Accepted                                       |
| <i>Diplotaxis tenuifolia</i> (L.) DC.                                    | Brassicaceae    | Accepted                                       |
| <i>Disphyma australe</i> (Sol. ex Aiton) J.M.Black.                      | Aizoaceae       | Accepted                                       |
| <i>Disphyma crassifolium</i> (L.) L.Bolus.                               | Aizoaceae       | Accepted                                       |

|                                                                    |               |                                                         |
|--------------------------------------------------------------------|---------------|---------------------------------------------------------|
| <i>Disphyma crassifolium</i> subsp.<br><i>Clavellatum</i>          | Aizoaceae     | Synonym of <i>Disphyma clavellatum</i> (Haw.) Chinnock. |
| <i>Dysphania carinata</i> (R.Br.)<br>Mosyakin & Clemants           | Amaranthaceae | Accepted                                                |
| <i>Dittrichia viscosa</i> (L.) Greuter.                            | Compositae    | Accepted                                                |
| <i>Dodecatheon media</i> L.                                        | Primulaceae   | Accepted                                                |
| <i>Dodonaea stenozyga</i> F.Muell.                                 | Sapindaceae   | Accepted                                                |
| <i>Draba aizoides</i> L.                                           | Brassicaceae  | Accepted                                                |
| <i>Draba hispanica</i> Boiss.                                      | Brassicaceae  | Accepted                                                |
| <i>Draba nemorosa</i> L.                                           | Brassicaceae  | Accepted                                                |
| <i>Draba streptocarpa</i> A.Gray.                                  | Brassicaceae  | Accepted                                                |
| <i>Dracaena marginata</i> 'bicolor'                                | Asparagaceae  | Variety of <i>Dracaena marginata</i> hort.              |
| <i>Dracaena marginata</i> 'colorama'                               | Asparagaceae  | Variety of <i>Dracaena marginata</i> hort.              |
| <i>Dracaena reflexa</i> Lam.                                       | Asparagaceae  | Accepted                                                |
| <i>Drosanthemum floribundum</i> (Haw.)<br>Schwantes.               | Aizoaceae     | Accepted                                                |
| <i>Drosanthemum hispidum</i> (L.)<br>Schwantes.                    | Aizoaceae     | Accepted                                                |
| <i>Dryas octopetala</i> subsp. <i>hookeriana</i><br>(Juz.) Hult,n. | Rosaceae      | Accepted                                                |
| <i>Dudleya caespitosa</i> (Haw.) Britton &<br>Rose.                | Crassulaceae  | Accepted                                                |
| <i>Dudleya cymosa</i> (Lem.) Britton &<br>Rose.                    | Crassulaceae  | Accepted                                                |
| <i>Dudleya farinosa</i> (Lindl.) Britton &<br>Rose.                | Crassulaceae  | Accepted                                                |
| <i>Dudleya lanceolata</i> (Nutt.) Britton &<br>Rose.               | Crassulaceae  | Accepted                                                |
| <i>Dudleya pulverulenta</i> (Nutt.) Britton<br>& Rose.             | Crassulaceae  | Accepted                                                |

|                                                    |              |                                     |
|----------------------------------------------------|--------------|-------------------------------------|
| <i>Duranta erecta</i> L.                           | Verbenaceae  | Accepted                            |
| <i>Duranta repens</i>                              | Verbenaceae  | Synonym of <i>Duranta erecta</i> L. |
| <i>Dymondia margaretae</i> Compton.                | Compositae   | Accepted                            |
| <i>Ebenus cretica</i> L.                           | Leguminosae  | Accepted                            |
| <i>Echeveria affinis</i> E.Walther                 | Crassulaceae | Accepted                            |
| <i>Echeveria atropurpurea</i> (Baker)<br>E.Morren. | Crassulaceae | Accepted                            |
| <i>Echeveria ballsii</i> E.Walther                 | Crassulaceae | Accepted                            |
| <i>Echeveria bicolor</i> (Kunth) E.Walther         | Crassulaceae | Accepted                            |
| <i>Echeveria carnicolor</i> (Baker)<br>E.Morren.   | Crassulaceae | Accepted                            |
| <i>Echeveria chihuahuensis</i> Poelln.             | Crassulaceae | Accepted                            |
| <i>Echeveria</i> cv. <i>hanatsukiyo</i>            | Crassulaceae | No results                          |
| <i>Echeveria gibbiflora</i> DC.                    | Crassulaceae | Accepted                            |
| <i>Echeveria prolifica</i> Moran &<br>J.Meyran.    | Crassulaceae | Accepted                            |
| <i>Echeveria pulidonis</i> E.Walther.              | Crassulaceae | Accepted                            |
| <i>Echeveria quitensis</i> (Kunth) Lindl.          | Crassulaceae | Accepted                            |
| <i>Echinacea pallida</i> (Nutt.) Nutt.             | Compositae   | Accepted                            |
| <i>Echinacea pupurea</i> (L.) Moench.              | Compositae   | Accepted                            |
| <i>Echinacea tennesseensis</i> (Beadle)<br>Small.  | Compositae   | Accepted                            |
| <i>Echinocereus fendleri</i> (Engelm.)<br>Rümpler. | Cactaceae    | Accepted                            |
| <i>Echinocereus triglochidiatus</i><br>Engelm.     | Cactaceae    | Accepted                            |
| <i>Echinocereus viridiflorus</i> Engelm.           | Cactaceae    | Accepted                            |
| <i>Echinochloa colona</i> (L.) Link                | Poaceae      | Accepted                            |
| <i>Echinochloa crus-galli</i> (L.) P.Beauv.        | Poaceae      | Accepted                            |
| <i>Echium amoenum</i> Fisch. &<br>C.A.Mey.         | Boraginaceae | Accepted                            |
| <i>Echium judaeum</i> Lacaita.                     | Boraginaceae | Accepted                            |

|                                                     |                  |                                             |
|-----------------------------------------------------|------------------|---------------------------------------------|
| <i>Echium plantagineum</i> 'Blue Bedder'            | Boraginaceae     | Variety of <i>Echium plantagineum</i> L.    |
| <i>Echium vulgare</i> L.                            | Boraginaceae     | Accepted                                    |
| <i>Eclipta prostrata</i> (L.) L.                    | Compositae       | Accepted                                    |
| <i>Einadia hastata</i> (R.Br.) A.J.Scott            | Amaranthaceae    | Accepted                                    |
| <i>Einadia nutans</i> (R.Br.) A.J.Scott             | Amaranthaceae    | Accepted                                    |
| <i>Egeria densa</i> Planch.                         | Hydrocharitaceae | Accepted                                    |
| <i>Eleocharis dulcis</i> (Burm.f.) Trin. ex Hensch. | Cyperaceae       | Accepted                                    |
| <i>Eleusine indica</i> (L.) Gaertn.                 | Poaceae          | Accepted                                    |
| <i>Elymus canadensis</i> L.                         | Poaceae          | Accepted                                    |
| <i>Elymus hystrix</i>                               | Poaceae          | Synonym of <i>Hystrix patula</i> Moench.    |
| <i>Elymus repens</i> (L.) Gould.                    | Poaceae          | Accepted                                    |
| <i>Elymus virginicus</i> L.                         | Poaceae          | Accepted                                    |
| <i>Elytrigia repens</i>                             | Poaceae          | Synonym of <i>Elymus repens</i> (L.) Gould. |
| <i>Emerus major</i>                                 | Leguminosae      | Unresolved                                  |
| <i>Emilia fosbergii</i> Nicolson                    | Compositae       | Accepted                                    |
| <i>Emilia sonchifolia</i> (L.) DC. ex DC.           | Compositae       | Accepted                                    |
| <i>Empetrum eamsii</i> Fernald & Wiegand.           | Ericaceae        | Accepted                                    |
| <i>Empetrum nigrum</i> L.                           | Ericaceae        | Accepted                                    |
| <i>Encelia farinosa</i> A.Gray ex Torr.             | Compositae       | Accepted                                    |
| <i>Enchylaena tomentosa</i> R.Br.                   | Amaranthaceae    | Accepted                                    |
| <i>Epacris impressa</i> Labill.                     | Ericaceae        | Accepted                                    |
| <i>Epacris longiflora</i> Cav.                      | Ericaceae        | Accepted                                    |
| <i>Ephedra minuta</i> Florin.                       | Ephedraceae      | Accepted                                    |
| <i>Epilobium adenocaulon</i>                        | Onagraceae       | Synonym of <i>Epilobium ciliatum</i> Raf.   |
| <i>Epilobium angustifolium</i> L.                   | Onagraceae       | Accepted                                    |



|                                                         |                  |                                                            |
|---------------------------------------------------------|------------------|------------------------------------------------------------|
| <i>Epilobium canum</i> ssp. <i>canum</i>                | Onagraceae       | Synonym of <i>Epilobium canum</i> (Greene)<br>P.H.Raven.   |
| <i>Epilobium ciliatum</i> Raf.                          | Onagraceae       | Accepted                                                   |
| <i>Epilobium coloratum</i> Biehler.                     | Onagraceae       | Accepted                                                   |
| <i>Epilobium hirsutum</i> L.                            | Onagraceae       | Accepted                                                   |
| <i>Epilobium montanum</i> L.                            | Onagraceae       | Accepted                                                   |
| <i>Epilobium parviflorum</i> Schreb.                    | Onagraceae       | Accepted                                                   |
| <i>Epilobium tetragonum</i> L.                          | Onagraceae       | Accepted                                                   |
| <i>Episcia cupreata</i> (Hook.) Hanst.                  | Gesneriaceae     | Accepted                                                   |
| <i>Equisetum arvense</i> L.                             | Equisetaceae     | Accepted                                                   |
| <i>Equisetum hyemale</i> L.                             | Equisetaceae     | Accepted                                                   |
| <i>Eragrostis atrovirens</i> (Desf.) Trin.<br>ex Steud. | Poaceae          | Accepted                                                   |
| <i>Eragrostis barrileri</i> Daveau.                     | Poaceae          | Accepted                                                   |
| <i>Eragrostis cilianensis</i> (All.) Janch.             | Poaceae          | Accepted                                                   |
| <i>Eragrostis minor</i> Host.                           | Poaceae          | Accepted                                                   |
| <i>Eragrostis pastoensis</i> (Kunth) Trin.              | Poaceae          | Accepted                                                   |
| <i>Eragrostis pectinacea</i> (Michx.)<br>Nees.          | Poaceae          | Accepted                                                   |
| <i>Eragrostis retinens</i> Hack. &<br>Arechav.          | Poaceae          | Accepted                                                   |
| <i>Eragrostis spectabilis</i> (Pursh) Steud.            | Poaceae          | Accepted                                                   |
| <i>Eragrostis tenella</i>                               | Poaceae          | Synonym of <i>Eragrostis amabilis</i> (L.) Wight &<br>Arn. |
| <i>Eragrostis virescens</i> J.Presl                     | Poaceae          | Accepted                                                   |
| <i>Eremochloa ophiuroides</i> (Munro)<br>Hack.          | Poaceae          | Accepted                                                   |
| <i>Eremophila divaricata</i> (F.Muell.)<br>F.Muell.     | Scrophulariaceae | Accepted                                                   |
| <i>Eremophila gibbifolia</i> (F.Muell.)<br>F.Muell.     | Scrophulariaceae | Accepted                                                   |

|                                                                         |                  |                                                                                 |
|-------------------------------------------------------------------------|------------------|---------------------------------------------------------------------------------|
| <i>Eremophila polyclada</i> (F.Muell.)<br>F.Muell.                      | Scrophulariaceae | Accepted                                                                        |
| <i>Eremophila glabra</i> ‘Murchison<br>Magic’                           | Scrophulariaceae | Variety of <i>Eremophila glabra</i> (R.Br.) Ostenf.                             |
| <i>Eremophila nivea</i> Chinnock                                        | Scrophulariaceae | Accepted                                                                        |
| <i>Ericameria nauseosa</i> ssp. <i>nauseosa</i><br>var. <i>nauseosa</i> | Compositae       | Synonym of <i>Ericameria nauseosa</i> (Pall. ex Pursh)<br>G.L.Nesom & G.I.Baird |
| <i>Erigeron acer</i>                                                    | Compositae       | Unresolved                                                                      |
| <i>Erigeron aureus</i> Greene                                           | Compositae       | Accepted                                                                        |
| <i>Erigeron acris</i> L.                                                | Compositae       | Accepted                                                                        |
| <i>Erigeron annuus</i> (L.) Pers.                                       | Compositae       | Accepted                                                                        |
| <i>Erigeron caespitosus</i> Nutt.                                       | Compositae       | Accepted                                                                        |
| <i>Erigeron canadensis</i> L.                                           | Compositae       | Accepted                                                                        |
| <i>Erigeron elatior</i> (A.Gray) Greene.                                | Compositae       | Accepted                                                                        |
| <i>Erigeron glaucus</i> Ker Gawl.                                       | Compositae       | Accepted                                                                        |
| <i>Erigeron karvinskianus</i>                                           | Compositae       | Unresolved                                                                      |
| <i>Erigeron leiomerus</i> A.Gray.                                       | Compositae       | Accepted                                                                        |
| <i>Erigeron strigosus</i> Muhl. ex Willd.                               | Compositae       | Accepted                                                                        |
| <i>Erigeron vetensis</i> Rydb.                                          | Compositae       | Accepted                                                                        |
| <i>Eriogonum grande</i> var. <i>rubescens</i><br>(Greene) Munz.         | Polygonaceae     | Accepted                                                                        |
| <i>Eriogonum latifolium</i> Sm.                                         | Polygonaceae     | Accepted                                                                        |
| <i>Eriogonum parvifolium</i> Sm.                                        | Polygonaceae     | Accepted                                                                        |
| <i>Eriogonum umbellatum</i> Torr.                                       | Polygonaceae     | Accepted                                                                        |
| <i>Eriogonum umbellatum</i> var. <i>aureum</i><br>(Gand.) Reveal.       | Polygonaceae     | Accepted                                                                        |
| <i>Eriogonum umbellatum</i> var. <i>aureum</i><br>‘Psdowns’             | Polygonaceae     | Variety of <i>Eriogonum umbellatum</i> var. <i>aureum</i><br>(Gand.) Reveal.    |
| <i>Eriophyllum lanatum</i> (Pursh)<br>J.Forbes.                         | Compositae       | Accepted                                                                        |
| <i>Eriophyllum stoechadifolium</i> Lag.                                 | Compositae       | Accepted                                                                        |

|                                                     |               |                                                          |
|-----------------------------------------------------|---------------|----------------------------------------------------------|
| <i>Erodium cicutarium</i> (L.) L'Hér.               | Geraniaceae   | Accepted                                                 |
| <i>Erodium ciliatum</i>                             | Geraniaceae   | No results                                               |
| <i>Erodium malacoides</i> (L.) L'Hér.               | Geraniaceae   | Accepted                                                 |
| <i>Erodium manescavii</i> Coss.                     | Geraniaceae   | Accepted                                                 |
| <i>Erophila verna</i> (L.) DC.                      | Brassicaceae  | Accepted                                                 |
| <i>Eruca vesicaria</i> (L.) Cav.                    | Brassicaceae  | Accepted                                                 |
| <i>Eryngium ovinum</i> A.Cunn.                      | Apiaceae      | Accepted                                                 |
| <i>Eryngium yuccifolium</i> Michx.                  | Apiaceae      | Accepted                                                 |
| <i>Erysimum capitatum</i> (Douglas)<br>Greene.      | Brassicaceae  | Accepted                                                 |
| <i>Erysimum capitatum</i> var. <i>purshii</i>       | Brassicaceae  | Synonym of <i>Erysimum capitatum</i> (Douglas)<br>Greene |
| <i>Eschscholzia californica</i> 'Maritima'          | Papaveraceae  | Variety of <i>Eschscholzia californica</i> Cham.         |
| <i>Eschscholzia californica</i> Cham.               | Papaveraceae  | Accepted                                                 |
| <i>Escobaria missouriensis</i> (Sweet)<br>D.R.Hunt. | Cactaceae     | Accepted                                                 |
| <i>Escobaria vivípara</i> (Nutt.) Buxb.             | Cactaceae     | Accepted                                                 |
| <i>Euonymus japonicus</i> Thunb.                    | Celastraceae  | Accepted                                                 |
| <i>Euonymus nanus</i> var. <i>turkestanicus</i>     | Celastraceae  | Synonym of <i>Euonymus nanus</i> M.Bieb.                 |
| <i>Eupatorium hyssopifolium</i> L.                  | Compositae    | Accepted                                                 |
| <i>Eupatorium maculatum</i> L.                      | Compositae    | Accepted                                                 |
| <i>Eupatorium perfoliatum</i> L.                    | Compositae    | Accepted                                                 |
| <i>Eupatorium purpureum</i> L.                      | Compositae    | Accepted                                                 |
| <i>Eupatorium serotinum</i> Michx.                  | Compositae    | Accepted                                                 |
| <i>Euphorbia acerensis</i> Boiss.                   | Euphorbiaceae | Accepted                                                 |
| <i>Euphorbia albomarginata</i> Torr. &<br>A.Gray    | Euphorbiaceae | Accepted                                                 |
| <i>Euphorbia antisiphilitica</i> Zucc.              | Euphorbiaceae | Accepted                                                 |
| <i>Euphorbia characias</i> L.                       | Euphorbiaceae | Accepted                                                 |
| <i>Euphorbia corollata</i> L.                       | Euphorbiaceae | Accepted                                                 |

|                                                     |                |                                                    |
|-----------------------------------------------------|----------------|----------------------------------------------------|
| <i>Euphorbia cyparissias</i> L.                     | Euphorbiaceae  | Accepted                                           |
| <i>Euphorbia exigua</i> L.                          | Euphorbiaceae  | Accepted                                           |
| <i>Euphorbia graminea</i> Jacq.                     | Euphorbiaceae  | Accepted                                           |
| <i>Euphorbia hirta</i> L.                           | Euphorbiaceae  | Accepted                                           |
| <i>Euphorbia humifusa</i> Willd.                    | Euphorbiaceae  | Accepted                                           |
| <i>Euphorbia hypericifolia</i> L.                   | Euphorbiaceae  | Accepted                                           |
| <i>Euphorbia hyssopifolia</i> L.                    | Euphorbiaceae  | Accepted                                           |
| <i>Euphorbia jolkinii</i> Boiss.                    | Euphorbiaceae  | Accepted                                           |
| <i>Euphorbia klotzschii</i> Oudejans                | Euphorbiaceae  | Accepted                                           |
| <i>Euphorbia maculata</i> L.                        | Euphorbiaceae  | Accepted                                           |
| <i>Euphorbia milii</i> Des Moul.                    | Euphorbiaceae  | Accepted                                           |
| <i>Euphorbia myrsinites</i> L.                      | Euphorbiaceae  | Accepted                                           |
| <i>Euphorbia peplus</i> L.                          | Euphorbiaceae  | Accepted                                           |
| <i>Euphorbia pithyusa</i> L.                        | Euphorbiaceae  | Accepted                                           |
| <i>Euphorbia polychroma</i> 'Candy                  | Euphorbiaceae  | Synonym of <i>Euphorbia epithymoides</i> L.        |
| <i>Euphorbia sciadophila</i> Boiss.                 | Euphorbiaceae  | Accepted                                           |
| <i>Euphorbia segetalis</i> L.                       | Euphorbiaceae  | Accepted                                           |
| <i>Euphorbia serpens</i> Kunth                      | Euphorbiaceae  | Accepted                                           |
| <i>Euphorbia stenoclada</i> Baill.                  | Euphorbiaceae  | Accepted                                           |
| <i>Euphorbia thymifolia</i> L.                      | Euphorbiaceae  | Accepted                                           |
| <i>Euphorbia veneris</i> M.L.S.Khan.                | Euphorbiaceae  | Accepted                                           |
| <i>Euryomyrtus ramosissima</i> (A.Cunn.)<br>Trudgen | Myrtaceae      | Accepted                                           |
| <i>Eustachys distichophylla</i> (Lag.) Nees         | Poaceae        | Accepted                                           |
| <i>Eustachys retusa</i> (Lag.) Kunth.               | Poaceae        | Accepted                                           |
| <i>Eutaxia microphylla</i> (R.Br.)<br>J.M.Black.    | Leguminosae    | Accepted                                           |
| <i>Euthamia graminifolia</i> (L.) Nutt.             | Compositae     | Accepted                                           |
| <i>Euthamia tenuifolia</i> (Pursh) Nutt.            | Compositae     | Synonym of <i>Euthamia graminifolia</i> (L.) Nutt. |
| <i>Evolvulus alsinoides</i> (L.) L.                 | Convolvulaceae | Accepted                                           |

|                                                                            |                |                                                                          |
|----------------------------------------------------------------------------|----------------|--------------------------------------------------------------------------|
| <i>Evolvulus glomeratus</i> Nees & C. Mart.                                | Convolvulaceae | Accepted                                                                 |
| <i>Evolvulus pilosus</i>                                                   | Convolvulaceae | Unresolved                                                               |
| <i>Evolvulus nummularius</i> (L.) L.                                       | Convolvulaceae | Accepted                                                                 |
| <i>Excoecaria cochinchinensis</i> Lour.                                    | Euphorbiaceae  | Accepted                                                                 |
| <i>Fagopyrum esculentum</i> Moench.                                        | Polygonaceae   | Accepted                                                                 |
| <i>Fallopia convolvulus</i> (L.) Á.Löve.                                   | Polygonaceae   | Accepted                                                                 |
| <i>Fallopia dumetorum</i> (L.) Holub                                       | Polygonaceae   | Accepted                                                                 |
| <i>Fallopia japonica</i>                                                   | Polygonaceae   | Synonym of <i>Reynoutria japonica</i> Houtt.                             |
| <i>Fendlera rupicola</i> var. <i>wrightii</i> (Engelm. & A.Gray) A.Heller. | Hydrangeaceae  | Accepted                                                                 |
| <i>Festuca amethystina</i> L.                                              | Poaceae        | Accepted                                                                 |
| <i>Festuca arundinacea</i> Schreb.                                         | Poaceae        | Accepted                                                                 |
| <i>Festuca brachyphylla</i> Schult. & Schult.f.                            | Poaceae        | Accepted                                                                 |
| <i>Festuca brachyphylla</i> ssp. <i>breviculmis</i> 'Pt. Joe'              | Poaceae        | Synonym of <i>Festuca brachyphylla</i> Schult. & Schult.f.               |
| <i>Festuca californica</i> Vasey.                                          | Poaceae        | Accepted                                                                 |
| <i>Festuca filiformis</i> Pourr.                                           | Poaceae        | Accepted                                                                 |
| <i>Festuca gigantea</i> (L.) Vill.                                         | Poaceae        | Accepted                                                                 |
| <i>Festuca glauca</i> Vill.                                                | Poaceae        | Accepted                                                                 |
| <i>Festuca idahoensis</i> Elmer.                                           | Poaceae        | Accepted                                                                 |
| <i>Festuca longifolia</i> Thuill.                                          | Poaceae        | Accepted                                                                 |
| <i>Festuca marginata</i> (Hack.) K.Richt.                                  | Poaceae        | Accepted                                                                 |
| <i>Festuca ovina</i> L.                                                    | Poaceae        | Accepted                                                                 |
| <i>Festuca ovina</i> subsp. <i>cinerea</i>                                 | Poaceae        | No results                                                               |
| <i>Festuca ovina</i> subsp. <i>glauca</i>                                  | Poaceae        | Synonym of <i>Festuca arvernensis</i> Auquier, Kerguélen & Markgr.-Dann. |

|                                                                  |            |                                                                           |
|------------------------------------------------------------------|------------|---------------------------------------------------------------------------|
| <i>Festuca ovina subsp. ovina</i>                                | Poaceae    | Synonym of <i>Festuca ovina</i> L.                                        |
| <i>Festuca ovina var. vulgaris</i>                               | Poaceae    | Synonym of <i>Festuca ovina</i> L.                                        |
| <i>Festuca roemerii</i>                                          | Poaceae    | Synonym of <i>Festuca idahoensis subsp. roemerii</i> (Pavlick) S.G.Aiken. |
| <i>Festuca rubra 'Patricks Point'</i>                            | Poaceae    | Synonym of <i>Festuca rubra</i> L.                                        |
| <i>Festuca rubra</i> L.                                          | Poaceae    | Accepted                                                                  |
| <i>Festuca rubra subsp. arenaria</i>                             | Poaceae    | Synonym of <i>Festuca rubra</i> L.                                        |
| <i>Festuca rubra subsp. fallax</i>                               | Poaceae    | Synonym of <i>Festuca rubra</i> L.                                        |
| <i>Festuca saximontana</i> Rydb.                                 | Poaceae    | Accepted                                                                  |
| <i>Festuca trachyphylla</i> (Hack.) Hack.                        | Poaceae    | Accepted                                                                  |
| <i>Ficinia nodosa</i> (Rottb.) Goetgh.,<br>Muasya & D.A.Simpson. | Cyperaceae | Accepted                                                                  |
| <i>Ficus carica</i> L.                                           | Moraceae   | Accepted                                                                  |
| <i>Ficus microcarpa 'golden'</i>                                 | Moraceae   | Variety of <i>Ficus microcarpa</i> L.f.                                   |
| <i>Ficus microcarpa</i> L.f.                                     | Moraceae   | Accepted                                                                  |
| <i>Ficus pumila</i> L.                                           | Moraceae   | Accepted                                                                  |
| <i>Ficus radicans</i> Desf.                                      | Moraceae   | Synonym of <i>Ficus sagittata</i> Vahl                                    |
| <i>Ficus religiosa</i> L.                                        | Moraceae   | Accepted                                                                  |
| <i>Filago pyramidata</i> L.                                      | Compositae | Accepted                                                                  |
| <i>Filipendula purpurea</i>                                      | Rosaceae   | Synonym of <i>Filipendula glaberrima</i> Nakai.                           |
| <i>Filipendula vulgaris 'Kahome'</i>                             | Rosaceae   | Variety of <i>Filipendula vulgaris</i> Moench.                            |
| <i>Filipendula vulgaris</i> Moench.                              | Rosaceae   | Accepted                                                                  |
| <i>Fimbristylis cymosa</i> R.Br.                                 | Cyperaceae | Accepted                                                                  |

|                                                                     |                      |                                                                  |
|---------------------------------------------------------------------|----------------------|------------------------------------------------------------------|
| <i>Fimbristylis dichotoma</i> (L.) Vahl.                            | Cyperaceae           | Accepted                                                         |
| <i>Fimbristylis ovata</i> (Burm.f.) J.Kern                          | Cyperaceae           | Accepted                                                         |
| <i>Fittonia verschaffeltii</i> (Lem.) Van Houtte                    | Acanthaceae          | Synonym of <i>Fittonia albivenis</i> (Lindl. ex Veitch) Brummitt |
| <i>Foeniculum vulgare</i> Mill.                                     | Apiaceae             | Accepted                                                         |
| <i>Fragaria chiloensis</i> (L.) Mill.                               | Rosaceae             | Accepted                                                         |
| <i>Fragaria vesca</i> L.                                            | Rosaceae             | Accepted                                                         |
| <i>Fragaria virginiana</i> Mill.                                    | Rosaceae             | Accepted                                                         |
| <i>Fragaria x ananassa</i> (Duchesne ex Weston) Duchesne ex Rozier. | Rosaceae             | Accepted                                                         |
| <i>Frangula californica</i> 'Eve Case'                              | Rhamnaceae           | Variety of <i>Frangula californica</i> (Eschsch.) A.Gray.        |
| <i>Frankenia laevis</i> L.                                          | Frankeniaceae        | Accepted                                                         |
| <i>Frankenia thymifolia</i> Desf.                                   | Frankeniaceae        | Accepted                                                         |
| <i>Fraxinus excelsior</i> L.                                        | Oleaceae             | Accepted                                                         |
| <i>Galeopsis pubescens</i> Besser                                   | Lamiaceae            | Accepted                                                         |
| <i>Gaillardia aristata</i> Pursh                                    | Compositae           | Accepted                                                         |
| <i>Gaillardia pulchella</i> Foug.                                   | Compositae           | Accepted                                                         |
| <i>Galinsoga ciliata</i> Ruiz & Pav.                                | Compositae           | Accepted                                                         |
| <i>Galinsoga parviflora</i> Cav.                                    | Compositae           | Accepted                                                         |
| <i>Galium aparine</i> L.                                            | Rubiaceae            | Accepted                                                         |
| <i>Galium boreale</i> L.                                            | Rubiaceae            | Accepted                                                         |
| <i>Galium lucidum</i> All.                                          | Rubiaceae            | Accepted                                                         |
| <i>Galium mollugo</i> L.                                            | Rubiaceae            | Accepted                                                         |
| <i>Galium odoratum</i> (L.) Scop.                                   | Rubiaceae            | Accepted                                                         |
| <i>Galium pusillum</i> L.                                           | Rubiaceae            | Accepted                                                         |
| <i>Galium verum</i> L.                                              | Rubiaceae            | Accepted                                                         |
| <i>Galphimia glauca</i> Cav.                                        | Malpighiaceae        | Accepted                                                         |
| <i>Gasteria gracilis</i>                                            | Xanthorrhoeacea<br>e | Unresolved                                                       |
| <i>Gaultheria procumbens</i> L.                                     | Ericaceae            | Accepted                                                         |

|                                                             |              |                                                           |
|-------------------------------------------------------------|--------------|-----------------------------------------------------------|
| <i>Gaura lindheimeri</i> Engelm. & A.Gray.                  | Onagraceae   | Accepted                                                  |
| <i>Gazania nivea</i>                                        | Compositae   | Synonym of <i>Gazania jurineifolia</i> DC.                |
| <i>Gazania rigens</i> (L.) Gaertn.                          | Compositae   | Accepted                                                  |
| <i>Gazania uniflora</i>                                     | Compositae   | Synonym of <i>Gazania rigens</i> (L.) Gaertn.             |
| <i>Genista pilosa</i> L.                                    | Leguminosae  | Accepted                                                  |
| <i>Gentiana andrewsii</i> Griseb.                           | Gentianaceae | Accepted                                                  |
| <i>Geranium</i> × <i>cantabrigiense</i> P.F.Yeo             | Geraniaceae  | Unresolved                                                |
| <i>Geranium cinereum</i> ‘Ballerina’                        | Geraniaceae  | Cultivar of <i>Geranium cinereum</i> Cav.                 |
| <i>Geranium columbinum</i> L.                               | Geraniaceae  | Accepted                                                  |
| <i>Geranium endressii</i> J.Gay.                            | Geraniaceae  | Accepted                                                  |
| <i>Geranium lucidum</i> L.                                  | Geraniaceae  | Accepted                                                  |
| <i>Geranium molle</i> L.                                    | Geraniaceae  | Accepted                                                  |
| <i>Geranium purpureum</i> Vill.                             | Geraniaceae  | Accepted                                                  |
| <i>Geranium pusillum</i> L.                                 | Geraniaceae  | Accepted                                                  |
| <i>Geranium robertianum</i> L.                              | Geraniaceae  | Accepted                                                  |
| <i>Geranium sanguineum</i> L.                               | Geraniaceae  | Accepted                                                  |
| <i>Geranium zonale</i> L.                                   | Geraniaceae  | Synonym of <i>Pelargonium zonale</i> (L.) L'Hér. ex Aiton |
| <i>Geum rivale</i> L.                                       | Rosaceae     | Accepted                                                  |
| <i>Geum triflorum</i> Pursh.                                | Rosaceae     | Accepted                                                  |
| <i>Geum urbanum</i> L.                                      | Rosaceae     | Accepted                                                  |
| <i>Glandularia x hybrid</i>                                 | Verbenaceae  | Unresolved                                                |
| <i>Glaucium flavum</i> Crantz.                              | Papaveraceae | Accepted                                                  |
| <i>Glebionis coronarium</i> (L.) Cass. ex Spach.            | Compositae   | Accepted                                                  |
| <i>Glechoma hederacea</i> L.                                | Lamiaceae    | Accepted                                                  |
| <i>Glechoma longituba</i> (Nakai) Kuprian. (Nakai) Kuprian. | Lamiaceae    | Accepted                                                  |



|                                                           |                   |                                                    |
|-----------------------------------------------------------|-------------------|----------------------------------------------------|
| <i>Glycyrrhiza glabra</i> L.                              | Leguminosae       | Accepted                                           |
| <i>Gnaphalium antennarioides</i> DC.                      | Compositae        | Accepted                                           |
| <i>Gnaphalium pensylvanicum</i> Willd.                    | Compositae        | Accepted                                           |
| <i>Gomphrena globosa</i> L.                               | Amaranthaceae     | Accepted                                           |
| <i>Gomphrena pulchella</i> Mart.                          | Amaranthaceae     | Accepted                                           |
| <i>Gomphocarpus fruticosus</i> (L.)<br>W.T.Aiton          | Apocynaceae       | Accepted                                           |
| <i>Goodenia benthamiana</i> Carolin.                      | Goodeniaceae      | Accepted                                           |
| <i>Goodenia pinnatifida</i> Schltdl.                      | Goodeniaceae      | Accepted                                           |
| <i>Goodenia varia</i> R.Br.                               | Goodeniaceae      | Accepted                                           |
| <i>Glandularia tenera</i> (Spreng.)<br>Cabrera            | Verbenaceae       | Accepted                                           |
| <i>Grahamia bracteata</i> Gillies ex Hook.<br>& Arn.      | Anacampserotaceae | Accepted                                           |
| <i>Graptopetalum paraguayense</i><br>(N.E.Br.) E.Walther. | Crassulaceae      | Accepted                                           |
| <i>Graptopetalum paraguayense</i> subsp.<br><i>rose</i>   | Crassulaceae      | No results                                         |
| <i>Grevillea alpina</i> Lindl.                            | Proteaceae        | Accepted                                           |
| <i>Grevillea bipinnatifida</i> R.Br.                      | Proteaceae        | Accepted                                           |
| <i>Grevillea humilis</i> 'Coastal Gem'                    | Proteaceae        | Variety of <i>Grevillea humilis</i> Makinson       |
| <i>Grevillea leptobotrys</i> Meisn.                       | Proteaceae        | Accepted                                           |
| <i>Grevillea rosmarinifolia</i> A.Cunn.                   | Proteaceae        | Accepted                                           |
| <i>Grindelia cabrerae</i> Ariza.                          | Compositae        | Accepted                                           |
| <i>Grindelia hirsutula</i> Hook. & Arn.                   | Compositae        | Accepted                                           |
| <i>Grindelia stricta</i>                                  | Compositae        | Synonym of <i>Grindelia hirsutula</i> Hook. & Arn. |
| <i>Gymnadenia odoratissima</i> (L.) Rich.                 | Orchidaceae       | Accepted                                           |
| <i>Gypsophila muralis</i> L.                              | Caryophyllaceae   | Accepted                                           |
| <i>Gypsophila repens</i> 'Dorothy<br>Teacher'             | Caryophyllaceae   | Variety of <i>Gypsophila repens</i> L.             |

|                                                           |                 |                                                                                                |
|-----------------------------------------------------------|-----------------|------------------------------------------------------------------------------------------------|
| <i>Gypsophila repens</i> 'Rosea'                          | Caryophyllaceae | Variey of <i>Gypsophila repens</i> L.                                                          |
| <i>Halimione portulacoides</i>                            | Amaranthaceae   | Synonym of <i>Atriplex portulacoides</i> L.                                                    |
| <i>Haplopappus macrocephalus</i><br>(Poepp. ex Less.) DC. | Compositae      | Accepted                                                                                       |
| <i>Hardenbergia violácea</i> (Schneev.)<br>Stearn.        | Leguminosae     | Accepted                                                                                       |
| <i>Hedera helix</i> L.                                    | Araliaceae      | Accepted                                                                                       |
| <i>Hedera hibernica</i> (G.Kirchn.)<br>Carrière.          | Araliaceae      | Accepted                                                                                       |
| <i>Hedyotis corymbosa</i>                                 | Rubiaceae       | Synonym of <i>Oldenlandia corymbosa</i> L.                                                     |
| <i>Hedyotis longifolia</i>                                | Rubiaceae       | Synonym of <i>Houstonia longifolia</i> Gaertn.                                                 |
| <i>Hedyotis pinifolia</i>                                 | Rubiaceae       | Synonym of <i>Oldenlandia pinifolia</i> (Wall. ex G.Don) Kuntze.                               |
| <i>Hedyotis strigulosa</i> var. <i>parvifolia</i>         | Rubiaceae       | Synonym of <i>Oldenlandia strigulosa</i> Bartl. ex DC.                                         |
| <i>Hedyotis verticillata</i>                              | Rubiaceae       | Synonym of <i>Oldenlandia verticillata</i> L.                                                  |
| <i>Heimia salicifolia</i> (Kunth) Link                    | Lythraceae      | Accepted                                                                                       |
| <i>Helenium autumnale</i> L.                              | Compositae      | Accepted                                                                                       |
| <i>Helianthemum italicum</i>                              | Cistaceae       | Synonym of<br><i>Helianthemum oelandicum</i> subsp.<br><i>italicum</i> (L.) Font Quer & Rothm. |
| <i>Helianthemum mummularium</i> (L.)<br>Mill.             | Cistaceae       | Accepted                                                                                       |
| <i>Helianthus annuus</i> L.                               | Compositae      | Accepted                                                                                       |
| <i>Helianthus mollis</i> Lam.                             | Compositae      | Accepted                                                                                       |

|                                                                        |                      |                                                 |
|------------------------------------------------------------------------|----------------------|-------------------------------------------------|
| <i>Helichrysum arenarium</i> (L.) Moench.                              | Compositae           | Accepted                                        |
| <i>Helichrysum italicum</i> (Roth) G.Don.                              | Compositae           | Accepted                                        |
| <i>Helichrysum italicum</i> subsp. <i>microphyllum</i> (Willd.) Nyman. | Compositae           | Accepted                                        |
| <i>Helichrysum luteoalbum</i> (L.) Rchb.                               | Compositae           | Accepted                                        |
| <i>Helichrysum orientale</i> (L.) Vaill.                               | Compositae           | Accepted                                        |
| <i>Helichrysum rutidolepis</i> DC.                                     | Compositae           | Accepted                                        |
| <i>Helichrysum stoechas</i> (L.) Moench.                               | Compositae           | Accepted                                        |
| <i>Helichrysum stoechas</i> subsp. <i>barrelieri</i> (Ten.) Nyman      | Compositae           | Accepted                                        |
| <i>Heliconia</i> ‘American Dwarf’                                      | Heliconiaceae        | No results                                      |
| <i>Helicotrichon sempervirens</i> (Vill.) Pilg.                        | Poaceae              | Accepted                                        |
| <i>Helictotrichon pratense</i> (L.) Pilg.                              | Poaceae              | Accepted                                        |
| <i>Heliopsis helianthoides</i> (L.) Sweet.                             | Compositae           | Accepted                                        |
| <i>Heliotropium curassavicum</i> L.                                    | Boraginaceae         | Accepted                                        |
| <i>Heliotropium europaeum</i> L.                                       | Boraginaceae         | Accepted                                        |
| <i>Heliotropium hirsutissimum</i> Grauer.                              | Boraginaceae         | Accepted                                        |
| <i>Helleborus foetidus</i> L.                                          | Ranunculaceae        | Accepted                                        |
| <i>Hemerocallis</i> ‘Golden Chimes’                                    | Xanthorrhoeacea<br>e | No results                                      |
| <i>Hemerocallis</i> ‘Mary’s Gold’                                      | Xanthorrhoeacea<br>e | No results                                      |
| <i>Hemerocallis</i> ‘Stella de Oro’                                    | Xanthorrhoeacea<br>e | No results                                      |
| <i>Hemerocallis fulva</i> (L.) L.                                      | Xanthorrhoeacea<br>e | Accepted                                        |
| <i>Hemerocallis fulva</i> var. <i>littorea</i>                         | Xanthorrhoeacea<br>e | Synonym of <i>Hemerocallis littorea</i> Makino. |
| <i>Hemigraphis alternata</i> (Burm.f.) T.Anderson                      | Acanthaceae          | Accepted                                        |
| <i>Herniaria glabra</i> L.                                             | Caryophyllaceae      | Accepted                                        |

|                                                                   |                 |                                                                               |
|-------------------------------------------------------------------|-----------------|-------------------------------------------------------------------------------|
| <i>Herniaria glabra</i> 'Sea Foam'                                | Caryophyllaceae | Variety of <i>Herniaria glabra</i> L.                                         |
| <i>Herniaria hirsuta</i> L.                                       | Caryophyllaceae | Accepted                                                                      |
| <i>Hesperaloe parviflora</i> (Torr.)<br>J.M.Coult.                | Asparagaceae    | Accepted                                                                      |
| <i>Hesperostipa spartea</i> (Trin.)<br>Barkworth                  | Poaceae         | Synonym of <i>Stipa spartea</i> Trin.                                         |
| <i>Heterocentron elegans</i> (Schltdl.)<br>Kuntze.                | Melastomataceae | Accepted                                                                      |
| <i>Heterosperma ovatifolium</i> Cav.                              | Compositae      | Accepted                                                                      |
| <i>Heterotheca jonesii</i> (S.F.Blake)<br>S.L.Welsh & N.D.Atwood. | Compositae      | Accepted                                                                      |
| <i>Heuchera</i> 'Electra'                                         | Saxifragaceae   | No results                                                                    |
| <i>Heuchera</i> 'Obsidian'                                        | Saxifragaceae   | No results                                                                    |
| <i>Heuchera abramsii</i> Rydb.                                    | Saxifragaceae   | Accepted                                                                      |
| <i>Heuchera americana</i> L.                                      | Saxifragaceae   | Accepted                                                                      |
| <i>Heuchera cylindrica</i> Douglas.                               | Saxifragaceae   | Accepted                                                                      |
| <i>Heuchera elegans</i> Abrams.                                   | Saxifragaceae   | Accepted                                                                      |
| <i>Heuchera grossulariifolia</i>                                  | Saxifragaceae   | Synonym of <i>Heuchera hallii</i> var. <i>grossularifolia</i> (Rydb.) Rosend. |
| <i>Heuchera maxima</i> Greene.                                    | Saxifragaceae   | Accepted                                                                      |
| <i>Heuchera micrantha</i> Douglas ex<br>Lindl.                    | Saxifragaceae   | Accepted                                                                      |
| <i>Heuchera parishii</i> Rydb.                                    | Saxifragaceae   | Accepted                                                                      |
| <i>Heuchera parvifolia</i> Nutt. ex Torr. &<br>A. Gray.           | Saxifragaceae   | Accepted                                                                      |
| <i>Heuchera pulchella</i> Wooton &<br>Standl.                     | Saxifragaceae   | Accepted                                                                      |
| <i>Heuchera richardsonii</i> R. Br.                               | Saxifragaceae   | Accepted                                                                      |
| <i>Hibbertia obtusifolia</i>                                      | Dilleniaceae    | Unresolved                                                                    |
| <i>Hibiscus sabdariffa</i> L.                                     | Malvaceae       | Accepted                                                                      |

|                                                        |              |                                                                                  |
|--------------------------------------------------------|--------------|----------------------------------------------------------------------------------|
| <i>Hieracium aurantiacum</i>                           | Compositae   | Synonym of <i>Pilosella aurantiaca</i> (L.)<br>F.W.Schultz & Sch.Bip.            |
| <i>Hieracium canadense</i>                             | Compositae   | Synonym of <i>Hieracium umbellatum</i> L.                                        |
| <i>Hieracium murorum</i> C.B.Clarke.                   | Compositae   | Accepted                                                                         |
| <i>Hieracium pilosella</i>                             | Compositae   | Synonym of <i>Pilosella officinarum</i> Vaill.                                   |
| <i>Hieracium umbellatum</i>                            | Compositae   | Accepted                                                                         |
| <i>Hilaria jamesii</i> (Torr.) Benth.                  | Poaceae      | Accepted                                                                         |
| <i>Hippocrepis comosa</i> L.                           | Leguminosae  | Accepted                                                                         |
| <i>Hirschfeldia incana</i> (L.) Lagr.-Foss.            | Brassicaceae | Accepted                                                                         |
| <i>Holcus lanatus</i> L.                               | Poaceae      | Accepted                                                                         |
| <i>Hordeum geniculatum</i>                             | Poaceae      | Synonym of <i>Hordeum marinum</i> subsp.<br><i>gussoneanum</i> (Parl.)<br>Thell. |
| <i>Hordeum glaucum</i>                                 | Poaceae      | Synonym of <i>Hordeum murinum</i> subsp. <i>glaucum</i><br>(Steud.) Tzvelev.     |
| <i>Hornungia petraea</i> (L.) Rchb.                    | Brassicaceae | Accepted                                                                         |
| <i>Houstonia caerulea</i> L.                           | Rubiaceae    | Accepted                                                                         |
| <i>Humulus lupulus</i> L.                              | Cannabaceae  | Accepted                                                                         |
| <i>Hydrocotyle sibthorpioides</i> Lam.                 | Araliaceae   | Accepted                                                                         |
| <i>Hydrocotyle verticillata</i> Thunb.                 | Araliaceae   | Accepted                                                                         |
| <i>Hylotelephium cyaneum</i> H. Ohba                   | Crassulaceae | Synonym of <i>Sedum cyaneum</i> J. Rudolph                                       |
| <i>Hylotelephium erythrostictum</i> (Miq.)<br>H. Ohba. | Crassulaceae | Accepted                                                                         |
| <i>Hylotelephium ewersii</i>                           | Crassulaceae | Synonym of <i>Sedum ewersii</i> Ledeb.                                           |
| <i>Hylotelephium maximum</i>                           | Crassulaceae | Synonym of <i>Sedum maximum</i> (L.) Suter.                                      |

|                                                      |                 |                                                     |
|------------------------------------------------------|-----------------|-----------------------------------------------------|
| <i>Hylotelephium spectabile</i> (Boreau)<br>H. Ohba. | Crassulaceae    | Accepted                                            |
| <i>Hypericum calycinum</i> L.                        | Hypericaceae    | Accepted                                            |
| <i>Hypericum empetrifolium</i> Willd.                | Hypericaceae    | Accepted                                            |
| <i>Hylotelephium telephium</i>                       | Crassulaceae    | Synonym of <i>Sedum telephium</i> L.                |
| <i>Hypericum moserianum</i>                          | Hypericaceae    | Unresolved                                          |
| <i>Hypericum monogynum</i> L.                        | Hypericaceae    | Accepted                                            |
| <i>Hypericum olympicum</i> L.                        | Hypericaceae    | Accepted                                            |
| <i>Hypericum perforatum</i> L.                       | Hypericaceae    | Accepted                                            |
| <i>Hypochaeris radicata</i>                          | Compositae      | Unresolved                                          |
| <i>Hypoxis hirsuta</i> (L.) Coville.                 | Hypoxidaceae    | Accepted                                            |
| <i>Hyssopus officinalis</i> L.                       | Lamiaceae       | Accepted                                            |
| <i>Hysterionica jasionoides</i> Willd.               | Compositae      | Accepted                                            |
| <i>Hystrix patula</i> Moench.                        | Poaceae         | Accepted                                            |
| <i>Iberis amara</i> L.                               | Brassicaceae    | Accepted                                            |
| <i>Iberis sempervirens</i> L.                        | Brassicaceae    | Accepted                                            |
| <i>Iberis umbellata</i> 'Fairy'                      | Brassicaceae    | Variety of <i>Iberis umbellata</i> L.               |
| <i>Ilex cornuta</i> Lindl. & Paxton.                 | Aquifoliaceae   | Accepted                                            |
| <i>Illecebrum verticillatum</i> L.                   | Caryophyllaceae | Accepted                                            |
| <i>Illicium verum</i> Hook.f.                        | Schisandraceae  | Accepted                                            |
| <i>Impatiens noli-tangere</i> L.                     | Balsaminaceae   | Accepted                                            |
| <i>Impatiens parviflora</i> DC.                      | Balsaminaceae   | Accepted                                            |
| <i>Impatiens walleriana</i> Hook.f.                  | Balsaminaceae   | Accepted                                            |
| <i>Imperata cylindrica</i> (L.) Raeusch.             | Poaceae         | Accepted                                            |
| <i>Imperata cylindrica</i> var. <i>major</i>         | Poaceae         | Synonym of <i>Imperata cylindrica</i> (L.) Raeusch. |
| <i>Indigofera australis</i> Willd.                   | Leguminosae     | Accepted                                            |
| <i>Inula britannica</i> L.                           | Compositae      | Accepted                                            |
| <i>Inula conyza</i> (Griess.) DC.                    | Compositae      | Accepted                                            |
| <i>Inula hirta</i> L.                                | Compositae      | Accepted                                            |
| <i>Ionactis linariifolia</i> (L.) Greene.            | Compositae      | Accepted                                            |

|                                                |                |                                                                    |
|------------------------------------------------|----------------|--------------------------------------------------------------------|
| <i>Ipheion uniflorum</i> Raf.                  | Amaryllidaceae | Accepted                                                           |
| <i>Ipomoea batatas</i> (L.) Lam.               | Convolvulaceae | Accepted                                                           |
| <i>Ipomoea cairica</i> (L.) Sweet              | Convolvulaceae | Accepted                                                           |
| <i>Ipomoea nil</i> (L.) Roth                   | Convolvulaceae | Accepted                                                           |
| <i>Ipomoea pes-caprae</i> (L.) R. Br.          | Convolvulaceae | Accepted                                                           |
| <i>Ipomoea purpurea</i> (L.) Roth              | Convolvulaceae | Accepted                                                           |
| <i>Ipomoea quamoclit</i> L.                    | Convolvulaceae | Accepted                                                           |
| <i>Ipomoea triloba</i> L.                      | Convolvulaceae | Accepted                                                           |
| <i>Ipomopsis aggregata</i> (Pursh) V.E. Grant. | Polemoniaceae  | Accepted                                                           |
| <i>Ipomopsis rubra</i> (L.) Wherry.            | Polemoniaceae  | Accepted                                                           |
| <i>Iris</i> 'Music Box'                        | Iridaceae      | No results                                                         |
| <i>Iris bucharica</i> Foster.                  | Iridaceae      | Accepted                                                           |
| <i>Iris chamaeiris</i>                         | Iridaceae      | Synonym of <i>Iris lutescens</i> Lam.                              |
| <i>Iris chrysophylla</i> Howell.               | Iridaceae      | Accepted                                                           |
| <i>Iris danfordiae</i> (Baker) Boiss.          | Iridaceae      | Accepted                                                           |
| <i>Iris douglasiana</i> Herb.                  | Iridaceae      | Accepted                                                           |
| <i>Iris germanica dwarf</i>                    | Iridaceae      | Variety of <i>Iris</i> × <i>germanica</i> L.                       |
| <i>Iris lutescens</i> Lam.                     | Iridaceae      | Accepted                                                           |
| <i>Iris pumila</i> L.                          | Iridaceae      | Accepted                                                           |
| <i>Iris reticulata</i> M.Bieb.                 | Iridaceae      | Accepted                                                           |
| <i>Iris sibirica</i> L.                        | Iridaceae      | Accepted                                                           |
| <i>Iris tectorum</i> Maxim.                    | Iridaceae      | Accepted                                                           |
| <i>Isotoma axillaris</i> Lindl.                | Campanulaceae  | Accepted                                                           |
| <i>Ixiolirion pallasii</i>                     | Ixioliriaceae  | Synonym of <i>Ixiolirion tataricum</i> (Pall.) Schult. & Schult.f. |
| <i>Ixora chinensis</i> Lam.                    | Rubiaceae      | Accepted                                                           |
| <i>Ixora coccinea</i> L.                       | Rubiaceae      | Accepted                                                           |
| <i>Ixora williamsii</i>                        | Rubiaceae      | Synonym of <i>Ixora casei</i> Hance.                               |

|                                                          |                  |                                                                                   |
|----------------------------------------------------------|------------------|-----------------------------------------------------------------------------------|
| <i>Jacobaea maritima</i> (L.) Pelser & Meijden           | Compositae       | Accepted                                                                          |
| <i>Jasione montana</i> L.                                | Campanulaceae    | Accepted                                                                          |
| <i>Juncus balticus</i> Willd.                            | Juncaceae        | Accepted                                                                          |
| <i>Juncus patens</i> E.Mey.                              | Juncaceae        | Accepted                                                                          |
| <i>Juncus secundus</i> P.Beauv. ex Poir.                 | Juncaceae        | Accepted                                                                          |
| <i>Juncus tenuis</i> Willd.                              | Juncaceae        | Accepted                                                                          |
| <i>Juncus xiphioides</i> E.Mey.                          | Juncaceae        | Accepted                                                                          |
| <i>Juniperus communis</i> L.                             | Cupressaceae     | Accepted                                                                          |
| <i>Juniperus horizontalis</i> Moench                     | Cupressaceae     | Accepted                                                                          |
| <i>Justicia squarrosa</i> Griseb.                        | Acanthaceae      | Accepted                                                                          |
| <i>Kalanchoe blossfeldiana</i> Poelln.                   | Crassulaceae     | Accepted                                                                          |
| <i>Kalanchoe daigremontiana</i> Raym.-Hamet & H. Perrier | Crassulaceae     | Accepted                                                                          |
| <i>Kalanchoe fedtschenkoi</i>                            | Crassulaceae     | Synonym of <i>Bryophyllum fedtschenkoi</i> (Raym.-Hamet & H.Perrier) Lauz.-March. |
| <i>Kalanchoe garambiensis</i> Kudô.                      | Crassulaceae     | Accepted                                                                          |
| <i>Kalanchoe hildebrandtii</i> Baill.                    | Crassulaceae     | Accepted                                                                          |
| <i>Kalanchoe longiflora</i> var. <i>coccinea</i>         | Crassulaceae     | No results                                                                        |
| <i>Kalanchoe milloti</i> Raym.-Hamet & H. Perrier.       | Crassulaceae     | Accepted                                                                          |
| <i>Kalanchoe thyrsiflora</i>                             | Crassulaceae     | Synonym of <i>Kalanchoe tetraphylla</i> H. Perrier.                               |
| <i>Kalanchoe tomentosa</i> Baker                         | Crassulaceae     | Accepted                                                                          |
| <i>Kalanchoe</i> × <i>houghtonii</i> D.B.Ward            | Crassulaceae     | Unresolved                                                                        |
| <i>Kalmia polifolia</i> Wangenh.                         | Ericaceae        | Accepted                                                                          |
| <i>Kleinia mandraliscae</i> Tineo.                       | Compositae       | Accepted                                                                          |
| <i>Knautia arvensis</i> (L.) Coult.                      | Caprifoliaceae   | Accepted                                                                          |
| <i>Kniphofia uvaria</i> (L.) Oken                        | Xanthorrhoeaceae | Accepted                                                                          |
| <i>Koeleria cristata</i>                                 | Poaceae          | Unresolved                                                                        |



|                                                                        |             |                                                              |
|------------------------------------------------------------------------|-------------|--------------------------------------------------------------|
| <i>Koeleria glauca</i> (Spreng.) DC.                                   | Poaceae     | Accepted                                                     |
| <i>Koeleria macrantha</i> (Ledeb.) Schult.                             | Poaceae     | Accepted                                                     |
| <i>Koeleria pyramidata</i> (Lam.)<br>P.Beauv.                          | Poaceae     | Accepted                                                     |
| <i>Koeleria vallesiana</i> (Honck.) Bertol.<br>ex Schult.              | Poaceae     | Accepted                                                     |
| <i>Kuhnia eupatorioides</i>                                            | Compositae  | Synonym of <i>Brickellia eupatorioides</i> (L.)<br>Shinners. |
| <i>Kyllinga brevifolia</i> Rottb.                                      | Cyperaceae  | Accepted                                                     |
| <i>Lactuca perennis</i> L.                                             | Compositae  | Accepted                                                     |
| <i>Lactuca quercina</i> L.                                             | Compositae  | Accepted                                                     |
| <i>Lactuca sativa</i> L.                                               | Compositae  | Accepted                                                     |
| <i>Lactuca sativa</i> subsp. <i>crispa</i> (L.)<br>Schübl. & G.Martens | Compositae  | Synonym of <i>Lactuca sativa</i> L.                          |
| <i>Lactuca sativa</i> var. <i>longifolia</i>                           | Compositae  | Synonym of <i>Lactuca sativa</i> L.                          |
| <i>Lactuca serriola</i> L.                                             | Compositae  | Accepted                                                     |
| <i>Laennecia sophiifolia</i> (Kunth)<br>G.L.Nesom                      | Compositae  | Accepted                                                     |
| <i>Lagerstroemia indica</i> L.                                         | Lythraceae  | Accepted                                                     |
| <i>Lagurus ovatus</i> L.                                               | Poaceae     | Accepted                                                     |
| <i>Lamium album</i> L.                                                 | Lamiaceae   | Accepted                                                     |
| <i>Lampranthus blandus</i> Schwantes.                                  | Aizoaceae   | Accepted                                                     |
| <i>Lampranthus deltoides</i> (L.) Glen ex<br>Wijnands.                 | Aizoaceae   | Accepted                                                     |
| <i>Lampranthus multiradiatus</i> (Jacq.)<br>N.E.Br.                    | Aizoaceae   | Accepted                                                     |
| <i>Lampranthus spectabilis</i> (Haw.) N.E.<br>Br.                      | Aizoaceae   | Accepted                                                     |
| <i>Lantana camara</i> L.                                               | Verbenaceae | Accepted                                                     |
| <i>Lapsana communis</i> L.                                             | Compositae  | Accepted                                                     |
| <i>Lasthenia californica</i>                                           | Compositae  | Unresolved                                                   |

|                                                                     |              |                                                                            |
|---------------------------------------------------------------------|--------------|----------------------------------------------------------------------------|
| <i>Lathyrus maritima</i>                                            | Leguminosae  | Synonym of <i>Lathyrus japonicus</i> subsp. <i>maritimus</i> (L.) P.W.Ball |
| <i>Lathyrus pratensis</i> L.                                        | Leguminosae  | Accepted                                                                   |
| <i>Laurus nobilis</i> L.                                            | Lauraceae    | Accepted                                                                   |
| <i>Lavandula angustifolia</i> Mill.                                 | Lamiaceae    | Accepted                                                                   |
| <i>Lavandula dentata</i> L.                                         | Lamiaceae    | Accepted                                                                   |
| <i>Lavandula dentata</i> var. <i>dentata</i>                        | Lamiaceae    | Synonym of <i>Lavandula dentata</i> L.                                     |
| <i>Lavandula dentata</i> var. <i>candicans</i> Batt.                | Lamiaceae    | Accepted                                                                   |
| <i>Lavandula angustifolia</i> Mill.                                 | Lamiaceae    | Accepted                                                                   |
| <i>Lavandula spica</i> L.                                           | Lamiaceae    | Synonym of <i>Lavandula angustifolia</i> Mill.                             |
| <i>Lavandula stoechas</i> L.                                        | Lamiaceae    | Accepted                                                                   |
| <i>Lavandula stoechas</i> subsp. <i>luisieri</i> (Rozeira) Rozeira. | Lamiaceae    | Accepted                                                                   |
| <i>Lavatera cretica</i>                                             | Malvaceae    | Synonym of <i>Malva multiflora</i> (Cav.) Soldano, Banfi & Galasso.        |
| <i>Layia platyglossa</i> (Fisch. & C.A.Mey.) A.Gray.                | Compositae   | Accepted                                                                   |
| <i>Lechea minor</i> L.                                              | Cistaceae    | Accepted                                                                   |
| <i>Lens culinaris</i> Medik                                         | Leguminosae  | Accepted                                                                   |
| <i>Leontodon autumnalis</i>                                         | Compositae   | Synonym of <i>Scorzoneroideis autumnalis</i> (L.) Moench.                  |
| <i>Leontodon hispidus</i> L.                                        | Compositae   | Accepted                                                                   |
| <i>Leontodon saxatilis</i> Lam.                                     | Compositae   | Accepted                                                                   |
| <i>Leontodon tuberosus</i> L.                                       | Compositae   | Accepted                                                                   |
| <i>Leonurus japonicus</i> Houtt.                                    | Lamiaceae    | Accepted                                                                   |
| <i>Leopoldia comosa</i> (L.) Parl.                                  | Asparagaceae | Accepted                                                                   |
| <i>Lepidosperma concavum</i> R.Br.                                  | Cyperaceae   | Accepted                                                                   |

|                                                                                |                  |                                                                                                         |
|--------------------------------------------------------------------------------|------------------|---------------------------------------------------------------------------------------------------------|
| <i>Lepironia articulata</i> (Retz.) Domin.                                     | Cyperaceae       | Accepted                                                                                                |
| <i>Leptinella squalida</i> Hook.f.                                             | Compositae       | Accepted                                                                                                |
| <i>Leptochloa crinita</i>                                                      | Poaceae          | Accepted                                                                                                |
| <i>Leptorhynchos tenuifolius</i> F.Muell.                                      | Compositae       | Accepted                                                                                                |
| <i>Leptorhynchos squamatus</i> (Labill.)<br>Less.                              | Compositae       | Accepted                                                                                                |
| <i>Leptospermum rotundifolium</i><br>(Maiden & Betche) F.A.Rodway              | Myrtaceae        | Accepted                                                                                                |
| <i>Lespedeza capitata</i> Michx.                                               | Leguminosae      | Accepted                                                                                                |
| <i>Lespedeza virginica</i> (L.) Britton                                        | Leguminosae      | Accepted                                                                                                |
| <i>Leucanthemum</i> × <i>superbum</i><br>(Bergmans ex J.W.Ingram)<br>D.H.Kent. | Compositae       | Accepted                                                                                                |
| <i>Leucanthemum atlanticum</i>                                                 | Compositae       | Synonym of<br><i>Rhodanthemum</i><br><i>atlanticum</i> (Ball)<br>"B.H.Wilcox, K.Bremer<br>& Humphries". |
| <i>Leucanthemum vulgare</i> (Vaill.) Lam.                                      | Compositae       | Accepted                                                                                                |
| <i>Leucochrysum albicans</i> (A.Cunn.)<br>Paul G.Wilson                        | Compositae       | Accepted                                                                                                |
| <i>Leucophyllum frutescens</i> (Berland.)<br>I.M. Johnst.                      | Scrophulariaceae | Accepted                                                                                                |
| <i>Leymus mollis</i> (Trin.) Pilg.                                             | Poaceae          | Accepted                                                                                                |
| <i>Leymus racemosus</i> (Lam.) Tzvelev                                         | Poaceae          | Accepted                                                                                                |
| <i>Liatris aspera</i> Michx.                                                   | Compositae       | Accepted                                                                                                |
| <i>Liatris cylindracea</i> Michx.                                              | Compositae       | Accepted                                                                                                |
| <i>Liatris ligulistylis</i> (A.Nelson)<br>K.Schum.                             | Compositae       | Accepted                                                                                                |
| <i>Liatris punctata</i> Hook.                                                  | Compositae       | Accepted                                                                                                |
| <i>Liatris pycnostachya</i> Michx.                                             | Compositae       | Accepted                                                                                                |
| <i>Liatris spicata</i> (L.) Willd.                                             | Compositae       | Accepted                                                                                                |
| <i>Ligustrum sinense</i> Lour.                                                 | Oleaceae         | Accepted                                                                                                |

|                                                   |                |                                                |
|---------------------------------------------------|----------------|------------------------------------------------|
| <i>Ligustrum vicaryi</i>                          | Oleaceae       | Unresolved                                     |
| <i>Ligustrum vulgare</i> L.                       | Oleaceae       | Accepted                                       |
| <i>Lilium pavia</i>                               | Liliaceae      | No results                                     |
| <i>Lilium philadelphicum</i> L.                   | Liliaceae      | Accepted                                       |
| <i>Limoniastrum monopetalum</i> (L.)<br>Boiss.    | Plumbaginaceae | Accepted                                       |
| <i>Limonium carolinianum</i> (Walter)<br>Britton. | Plumbaginaceae | Accepted                                       |
| <i>Limonium graecum</i> (Poir.) Kuntze            | Plumbaginaceae | Accepted                                       |
| <i>Limonium latifolium</i>                        | Plumbaginaceae | Synonym of <i>Limonium platyphyllum</i> Lincz. |
| <i>Limonium virgatum</i>                          | Plumbaginaceae | Synonym of <i>Limonium oleifolium</i> Mill.    |
| <i>Linaria elegans</i> Cav.                       | Plantaginaceae | Accepted                                       |
| <i>Linaria maroccana</i> Hook. f.                 | Plantaginaceae | Accepted                                       |
| <i>Linaria vulgaris</i> Mill.                     | Plantaginaceae | Accepted                                       |
| <i>Lindernia antípoda</i> (L.) Alston.            | Linderniaceae  | Accepted                                       |
| <i>Lindernia crustácea</i> (L.) F.Muell.          | Linderniaceae  | Accepted                                       |
| <i>Lindernia rotundifolia</i> (L.) Alston.        | Linderniaceae  | Accepted                                       |
| <i>Linum bienne</i> Mill.                         | Linaceae       | Accepted                                       |
| <i>Linum catharticum</i> L.                       | Linaceae       | Accepted                                       |
| <i>Linum grandiflorum</i> var. <i>rubrum</i>      | Linaceae       | No results                                     |
| <i>Linum intercursum</i> E.P. Bicknell.           | Linaceae       | Accepted                                       |
| <i>Linum lewisii</i> Pursh.                       | Linaceae       | Accepted                                       |
| <i>Linum marginale</i> A.Cunn. ex Planch.         | Linaceae       | Accepted                                       |
| <i>Linum perenne</i> L.                           | Linaceae       | Accepted                                       |
| <i>Linum strictum</i> L.                          | Linaceae       | Accepted                                       |
| <i>Linum suffruticosum</i> L.                     | Linaceae       | Accepted                                       |
| <i>Linum tenuifolium</i> L.                       | Linaceae       | Accepted                                       |
| <i>Linum usitatissimum</i> L.                     | Linaceae       | Accepted                                       |
| <i>Liriope muscari</i> (Decne.) L.H.Bailey        | Asparagaceae   | Accepted                                       |
| <i>Liriope spicata</i> Lour.                      | Asparagaceae   | Accepted                                       |
| <i>Lobelia cardinalis</i> L.                      | Campanulaceae  | Accepted                                       |

|                                                                           |                |                                                                           |
|---------------------------------------------------------------------------|----------------|---------------------------------------------------------------------------|
| <i>Lobelia erinus</i> L.                                                  | Campanulaceae  | Accepted                                                                  |
| <i>Lobelia pratioides</i> Benth.                                          | Campanulaceae  | Accepted                                                                  |
| <i>Lobelia siphilitica</i> L.                                             | Campanulaceae  | Accepted                                                                  |
| <i>Lobelia spicata</i> var. <i>spicata</i>                                | Campanulaceae  | Synonym of <i>Lobelia spicata</i> Lam.                                    |
| <i>Lobularia maritima</i> (L.) Desv.                                      | Brassicaceae   | Accepted                                                                  |
| <i>Lolium multiflorum</i> Lam.                                            | Poaceae        | Accepted                                                                  |
| <i>Lolium perenne</i> L.                                                  | Poaceae        | Accepted                                                                  |
| <i>Lomandra filiformis</i> (Thunb.) Britten.                              | Asparagaceae   | Accepted                                                                  |
| <i>Lomandra longifolia</i> 'Tanika                                        | Asparagaceae   | Variety of <i>Lomandra longifolia</i> Labill.                             |
| <i>Lomandra longifolia</i> Labill.                                        | Asparagaceae   | Accepted                                                                  |
| <i>Lomandra micrantha</i> (Endl.) Ewart.                                  | Asparagaceae   | Accepted                                                                  |
| <i>Lomandra multiflora</i> (R.Br.) Britten.                               | Asparagaceae   | Accepted                                                                  |
| <i>Lomatium utriculatum</i> (Nutt. ex Torr. & A. Gray) J.M. Coult. & Rose | Apiaceae       | Accepted                                                                  |
| <i>Lomelosia cretica</i> (L.) Greuter & Burdet                            | Caprifoliaceae | Unresolved                                                                |
| <i>Lomelosia prolifera</i>                                                | Caprifoliaceae | Unresolved                                                                |
| <i>Lonicera dioica</i> L.                                                 | Caprifoliaceae | Accepted                                                                  |
| <i>Lonicera hispidula</i> Douglas ex Torr. & A. Gray.                     | Caprifoliaceae | Accepted                                                                  |
| <i>Lonicera pileata</i>                                                   | Caprifoliaceae | Synonym of <i>Lonicera ligustrina</i> var. <i>pileata</i> (Oliv.) Franch. |
| <i>Loropetalum chinense</i> (R. Br.) Oliv.                                | Hamamelidaceae | Accepted                                                                  |
| <i>Loropetalum chinense</i> var. <i>rubrum</i> Yieh.                      | Hamamelidaceae | Accepted                                                                  |
| <i>Lotus alpinus</i> (DC.) Ramond.                                        | Leguminosae    | Accepted                                                                  |
| <i>Lotus corniculatus</i> L.                                              | Leguminosae    | Accepted                                                                  |
| <i>Lotus corniculatus</i> subsp. <i>corniculatus</i>                      | Leguminosae    | Synonym of <i>Lotus corniculatus</i> L.                                   |

|                                                           |                 |                                                             |
|-----------------------------------------------------------|-----------------|-------------------------------------------------------------|
| <i>Lotus creticus</i> L.                                  | Leguminosae     | Accepted                                                    |
| <i>Luffa cylindrica</i> (L.) M.Roem.                      | Cucurbitaceae   | Accepted                                                    |
| <i>Lupinus albus</i> L.                                   | Leguminosae     | Accepted                                                    |
| <i>Lupinus arboreus</i> Sims.                             | Leguminosae     | Accepted                                                    |
| <i>Lupinus bicolor</i> Lindl.                             | Leguminosae     | Accepted                                                    |
| <i>Lupinus nanus</i> Benth.                               | Leguminosae     | Accepted                                                    |
| <i>Lupinus perennis</i> L.                                | Leguminosae     | Accepted                                                    |
| <i>Lupinus variicolor</i> Steud.                          | Leguminosae     | Accepted                                                    |
| <i>Luzula campestris</i> (L.) DC.                         | Juncaceae       | Accepted                                                    |
| <i>Luzula capitata</i> (Miq. ex Franch. & Sav.) Kom.      | Juncaceae       | Accepted                                                    |
| <i>Luzula multiflora</i> (Ehrh.) Lej.                     | Juncaceae       | Accepted                                                    |
| <i>Lychnis chalcedonica</i> L.                            | Caryophyllaceae | Synonym of <i>Silene chalcedonica</i> (L.) E.H.L.Krause     |
| <i>Lychnis coronaria</i> var 'Alba'                       | Caryophyllaceae | Synonym of <i>Silene coronaria</i> (Desr.) Clairv. ex Rchb. |
| <i>Lychnis viscaria</i>                                   | Caryophyllaceae | Synonym of <i>Silene viscaria</i> (L.) Jess.                |
| <i>Lycopersicon esculentum</i> Mill.                      | Solanaceae      | Accepted                                                    |
| <i>Lygodium scandens</i> (L.) Sw.                         | Lygodiaceae     | Accepted                                                    |
| <i>Lysimachia linum-stellatum</i> L.                      | Primulaceae     | Accepted                                                    |
| <i>Lysimachia mauritiana</i> Lam.                         | Primulaceae     | Accepted                                                    |
| <i>Lythrum salicaria</i> L.                               | Lythraceae      | Accepted                                                    |
| <i>Macaranga tanarius</i> (L.) Müll.Arg.                  | Euphorbiaceae   | Accepted                                                    |
| <i>Macropidia fuliginosa</i> (Hook.) Druce                | Haemodoraceae   | Accepted                                                    |
| <i>Macroptilium lathyroides</i> (L.) Urb.                 | Leguminosae     | Accepted                                                    |
| <i>Magnolia grandiflora</i> L.                            | Magnoliaceae    | Accepted                                                    |
| <i>Maianthemum canadense</i> Desf.                        | Asparagaceae    | Accepted                                                    |
| <i>Maihuenia poeppigii</i> (Otto ex Pfeiff.) F.A.C.Weber. | Cactaceae       | Accepted                                                    |

|                                                               |                |                                                              |
|---------------------------------------------------------------|----------------|--------------------------------------------------------------|
| <i>Maireana georgei</i> (Diels) Paul G. Wilson.               | Amaranthaceae  | Accepted                                                     |
| <i>Malephora lutea</i> Schwantes.                             | Aizoaceae      | Accepted                                                     |
| <i>Malephora crocea</i> (Jacq.) Schwantes                     | Aizoaceae      | Accepted                                                     |
| <i>Malus 'Ballerina'</i>                                      | Rosaceae       | No results                                                   |
| <i>Malus domestica</i> Borkh.                                 | Rosaceae       | Accepted                                                     |
| <i>Malus pumila</i> Mill.                                     | Rosaceae       | Accepted                                                     |
| <i>Malva moschata</i> L.                                      | Malvaceae      | Accepted                                                     |
| <i>Malva neglecta</i> Wallr.                                  | Malvaceae      | Accepted                                                     |
| <i>Malva parviflora</i> L.                                    | Malvaceae      | Accepted                                                     |
| <i>Malvastrum coromandelianum</i> (L.) Garcke                 | Malvaceae      | Accepted                                                     |
| <i>Manfreda maculosa</i> (Hook.) Rose.                        | Asparagaceae   | Accepted                                                     |
| <i>Manfreda virginica</i> (L.) Salisb. ex Rose.               | Asparagaceae   | Accepted                                                     |
| <i>Marsilea drummondii</i> A. Braun                           |                | Unresolved                                                   |
| <i>Matricaria chamomilla</i> L.                               | Compositae     | Accepted                                                     |
| <i>Matricaria perforata</i>                                   | Compositae     | Synonym of<br><i>Tripleurospermum inodorum</i> (L.) Sch.Bip. |
| <i>Mazus pumilus</i> (Burm.f.) Steenis.                       | Phrymaceae     | Accepted                                                     |
| <i>Mecardonia procumbens</i> (Mill.) Small.                   | Plantaginaceae | Accepted                                                     |
| <i>Medicago arborea</i> L.                                    | Leguminosae    | Accepted                                                     |
| <i>Medicago lupulina</i> L.                                   | Leguminosae    | Accepted                                                     |
| <i>Medicago polymorpha</i> L.                                 | Leguminosae    | Accepted                                                     |
| <i>Medicago sativa</i> L.                                     | Leguminosae    | Accepted                                                     |
| <i>Meeboldina scariosa</i> (R.Br.) B.G.Briggs & L.A.S.Johnson | Restionaceae   | Accepted                                                     |
| <i>Melampodium leucanthum</i> Torr. & A.Gray.                 | Compositae     | Accepted                                                     |
| <i>Melica ciliata</i> L.                                      | Poaceae        | Accepted                                                     |
| <i>Melica macra</i> Nees                                      | Poaceae        | Accepted                                                     |

|                                                                  |                  |                                              |
|------------------------------------------------------------------|------------------|----------------------------------------------|
| <i>Melilotus albus</i> Medik.                                    | Leguminosae      | Accepted                                     |
| <i>Melilotus officinalis</i> (L.) Pall.                          | Leguminosae      | Accepted                                     |
| <i>Melinis repens</i> (Willd.) Zizka.                            | Poaceae          | Accepted                                     |
| <i>Melissa officinalis</i> L.                                    | Lamiaceae        | Accepted                                     |
| <i>Melissa officinalis</i> subsp. <i>altissima</i> (Sm.) Arcang. | Lamiaceae        | Synonym of <i>Melissa officinalis</i> L.     |
| <i>Melothria pendula</i> L.                                      | Cucurbitaceae    | Accepted                                     |
| <i>Melstoma malabathricum</i> L.                                 | Melastomataceae  | Accepted                                     |
| <i>Mentha aquatica</i> L.                                        | Lamiaceae        | Accepted                                     |
| <i>Mentha</i> × <i>piperita</i> L.                               | Lamiaceae        | Accepted                                     |
| <i>Mentha pulegium</i> L.                                        | Lamiaceae        | Accepted                                     |
| <i>Mentha spicata</i> L.                                         | Lamiaceae        | Accepted                                     |
| <i>Mesembryanthemum barbatum</i>                                 | Aizoaceae        | Unresolved                                   |
| <i>Microlepidia hancei</i> Prantl.                               | Dennstaedtiaceae | Accepted                                     |
| <i>Micromyrtus leptocalyx</i> (F.Muell.) Benth.                  | Myrtaceae        | Accepted                                     |
| <i>Microseris lanceolata</i> (Walp.) Sch.Bip.                    | Compositae       | Accepted                                     |
| <i>Microtis unifolia</i> (G.Forst.) Rchb.f.                      | Orchidaceae      | Accepted                                     |
| <i>Microlaena stipoides</i> (Labill.) R.Br.                      | Poaceae          | Synonym of <i>Ehrharta stipoides</i> Labill. |
| <i>Mimosa pudica</i> L.                                          | Leguminosae      | Accepted                                     |
| <i>Mimulus aurantiacus</i> Curtis.                               | Phrymaceae       | Accepted                                     |
| <i>Mimulus cardinalis</i> Douglas ex Benth.                      | Phrymaceae       | Accepted                                     |
| <i>Mimulus guttatus</i> DC.                                      | Phrymaceae       | Accepted                                     |
| <i>Minuartia groenlandica</i> (Retz.) Ostenf.                    | Caryophyllaceae  | Accepted                                     |
| <i>Minuartia hybrida</i> (Vill.) Schischk.                       | Caryophyllaceae  | Accepted                                     |
| <i>Minuartia michauxii</i> (Fenzl) Farw.                         | Caryophyllaceae  | Accepted                                     |
| <i>Minuria leptophylla</i> DC.                                   | Compositae       | Accepted                                     |
| <i>Miscanthus sinensis</i> Andersson                             | Poaceae          | Accepted                                     |



|                                                 |               |                                                                    |
|-------------------------------------------------|---------------|--------------------------------------------------------------------|
| <i>Miscanthus sinensis</i> 'Silver Arrow'       | Poaceae       | Variety of <i>Miscanthus sinensis</i> Andersson.                   |
| <i>Molinia caerulea</i> (L.) Moench.            | Poaceae       | Accepted                                                           |
| <i>Mollugo verticillata</i> L.                  | Molluginaceae | Accepted                                                           |
| <i>Momordica charantia</i> L.                   | Cucurbitaceae | Accepted                                                           |
| <i>Monarda didyma</i> L.                        | Lamiaceae     | Accepted                                                           |
| <i>Monarda fistulosa</i> L.                     | Lamiaceae     | Accepted                                                           |
| <i>Monarda punctata</i> L.                      | Lamiaceae     | Accepted                                                           |
| <i>Monardella villosa</i> Benth.                | Lamiaceae     | Accepted                                                           |
| <i>Morella californica</i>                      | Myricaceae    | Synonym of <i>Myrica californica</i> Cham. & Schltdl.              |
| <i>Morella pensylvanica</i>                     | Myricaceae    | Unresolved                                                         |
| <i>Mucuna pruriens</i> (L.) DC.                 | Leguminosae   | Accepted                                                           |
| <i>Muhlenbergia cuspidata</i> (Torr.) Rydb.     | Poaceae       | Accepted                                                           |
| <i>Muhlenbergia emersleyi</i> Vasey.            | Poaceae       | Accepted                                                           |
| <i>Muhlenbergia mexicana</i> (L.) Trin.         | Poaceae       | Accepted                                                           |
| <i>Muhlenbergia montana</i> (Nutt.) Hitchc.     | Poaceae       | Accepted                                                           |
| <i>Muhlenbergia reverchonii</i> Vasey & Scribn. | Poaceae       | Accepted                                                           |
| <i>Muhlenbergia rigens</i> (Benth.) Hitchc.     | Poaceae       | Accepted                                                           |
| <i>Murraya paniculata</i> (L.) Jack.            | Rutaceae      | Accepted                                                           |
| <i>Muscari arachnoideum</i>                     | Asparagaceae  | No results                                                         |
| <i>Muscari armeniacum</i> Leichtlin ex Baker.   | Asparagaceae  | Accepted                                                           |
| <i>Muscari azureum</i>                          | Asparagaceae  | Synonym of <i>Pseudomuscari azureum</i> (Fenzl) Garbari & Greuter. |

|                                                                  |                  |                                                                            |
|------------------------------------------------------------------|------------------|----------------------------------------------------------------------------|
| <i>Muscari comosum</i>                                           | Asparagaceae     | Synonym of <i>Leopoldia comosa</i> (L.) Parl.                              |
| <i>Myoporum parvifolium</i>                                      | Scrophulariaceae | Unresolved                                                                 |
| <i>Myosotis arvensis</i> (L.) Hill.                              | Boraginaceae     | Accepted                                                                   |
| <i>Myosotis discolor</i> Pers.                                   | Boraginaceae     | Accepted                                                                   |
| <i>Myosotis ramosissima</i> Rochel.                              | Boraginaceae     | Accepted                                                                   |
| <i>Myosotis stricta</i> Link ex Roem. & Schult.                  | Boraginaceae     | Accepted                                                                   |
| <i>Myosotis sylvatica</i> Hoffm.                                 | Boraginaceae     | Accepted                                                                   |
| <i>Nama undulatum</i> Kunth.                                     | Boraginaceae     | Accepted                                                                   |
| <i>Narcissus bulbocodium</i> var. <i>conspicuus</i> (Haw.) Baker | Amaryllidaceae   | Synonym of <i>Narcissus bulbocodium</i> subsp. <i>quintanilhae</i> A.Fern. |
| <i>Narcissus cyclamineus</i> DC.                                 | Amaryllidaceae   | Accepted                                                                   |
| <i>Narcissus tazetta</i> L.                                      | Amaryllidaceae   | Accepted                                                                   |
| <i>Nassella neesiana</i> (Trin. & Rupr.) Barkworth               | Poaceae          | Accepted                                                                   |
| <i>Nassella pulchra</i> (Hitchc.) Barkworth.                     | Poaceae          | Accepted                                                                   |
| <i>Nassella tenuissima</i> (Trin.) Barkworth.                    | Poaceae          | Accepted                                                                   |
| <i>Nectaroscordum siculum</i> (Ucria) Lindl.                     | Amaryllidaceae   | Synonym of <i>Allium siculum</i> Ucria                                     |
| <i>Nemophila menziesii</i> Hook. & Arn.                          | Boraginaceae     | Accepted                                                                   |
| <i>Neomarica longifolia</i> (Link & Otto) Sprague.               | Iridaceae        | Accepted                                                                   |
| <i>Neoregelia 'Fireball'</i>                                     | Bromeliaceae     | No results                                                                 |
| <i>Neoregelia concentrica</i> (Vell.) L.B.Sm.                    | Bromeliaceae     | Accepted                                                                   |
| <i>Neoregelia cruenta</i> (Graham) L.B.Sm.                       | Bromeliaceae     | Accepted                                                                   |
| <i>Neottia auriculata</i> (Wiegand) Szlach.                      | Orchidaceae      | Accepted                                                                   |

|                                                                   |                      |                                                   |
|-------------------------------------------------------------------|----------------------|---------------------------------------------------|
| <i>Nepeta</i> × <i>faassenii</i> Bergmans ex Stearn.              | Lamiaceae            | Accepted                                          |
| <i>Nepeta cataria</i> L.                                          | Lamiaceae            | Accepted                                          |
| <i>Nepeta racemosa</i> Lam.                                       | Lamiaceae            | Accepted                                          |
| <i>Nephrolepis bisserata</i> (Sw.) Schott.                        | Nephrolepidacea<br>e | Accepted                                          |
| <i>Nephrolepis exaltata</i> (L.) Schott.                          | Nephrolepidacea<br>e | Accepted                                          |
| <i>Nephrolepis multiflora</i> (Roxb.) F.M. Jarrett ex C.V. Morton | Nephrolepidacea<br>e | Accepted                                          |
| <i>Nerium oleander</i> 'pink'                                     | Apocynaceae          | Variety of <i>Nerium oleander</i> L.              |
| <i>Neyraudia reynaudiana</i> (Kunth) Keng ex Hitchc.              | Poaceae              | Accepted                                          |
| <i>Nierembergia linariifolia</i> Graham                           | Solanaceae           | Accepted                                          |
| <i>Nigella damascena</i> L.                                       | Ranunculaceae        | Accepted                                          |
| <i>Nolina microcarpa</i> S.Watson.                                | Asparagaceae         | Accepted                                          |
| <i>Nothoscordum arenarium</i> Herter                              | Amaryllidaceae       | Accepted                                          |
| <i>Ocimum basilicum</i> L.                                        | Lamiaceae            | Accepted                                          |
| <i>Ocinum x citriodolum</i>                                       | Lamiaceae            | Synonym of <i>Ocimum</i> × <i>africanum</i> Lour. |
| <i>Oenothera biennis</i> L.                                       | Onagraceae           | Accepted                                          |
| <i>Oenothera caespitosa</i>                                       | Onagraceae           | Unresolved                                        |
| <i>Oenothera elata</i> ssp. <i>hookeri</i>                        | Onagraceae           | Synonym of <i>Oenothera elata</i> Kunth.          |
| <i>Oenothera fruticosa</i> ssp. <i>glauca</i> (Michx.) Straley.   | Onagraceae           | Accepted                                          |
| <i>Oenothera lamarckiana</i>                                      | Onagraceae           | Unresolved                                        |
| <i>Oenothera macrocarpa</i> Nutt.                                 | Onagraceae           | Accepted                                          |
| <i>Oenothera rhombipetala</i> Nutt. ex Torr. & A. Gray            | Onagraceae           | Accepted                                          |
| <i>Oenothera speciosa</i> Nutt.                                   | Onagraceae           | Accepted                                          |
| <i>Olea</i> 'Garden Harvest' (Olive)                              | Oleaceae             | No results                                        |

|                                                     |              |                                                                                  |
|-----------------------------------------------------|--------------|----------------------------------------------------------------------------------|
| <i>Olearia axillaris</i> (DC.) F.Muell. ex Benth.   | Compositae   | Accepted                                                                         |
| <i>Olearia pannosa</i> Hook.                        | Compositae   | Accepted                                                                         |
| <i>Oligoneuron album</i>                            | Compositae   | Synonym of <i>Solidago ptarmicoides</i> (Torr. & A.Gray) B.Boivin.               |
| <i>Olsynium biflorum</i> (Thunb.) Goldblatt.        | Iridaceae    | Accepted                                                                         |
| <i>Onobrychis viciifolia</i> Scop.                  | Leguminosae  | Accepted                                                                         |
| <i>Ononis striata</i> Gouan.                        | Leguminosae  | Accepted                                                                         |
| <i>Ophiopogon intermedius</i> 'Argenteo-marginatus' | Asparagaceae | Variety of <i>Ophiopogon intermedius</i> D.Don.                                  |
| <i>Ophiopogon jaburan</i> (Siebold) Lodd.           | Asparagaceae | Accepted                                                                         |
| <i>Ophiopogon japonicus</i> (Thunb.) Ker Gawl.      | Asparagaceae | Accepted                                                                         |
| <i>Ophiopogon japonicus</i> 'Nanus'                 | Asparagaceae | Variety of <i>Ophiopogon japonicus</i> (Thunb.) Ker Gawl.                        |
| <i>Ophrys insectifera</i> L.                        | Orchidaceae  | Accepted                                                                         |
| <i>Opisthopappus taihangensis</i> (Ling) C.Shih.    | Compositae   | Accepted                                                                         |
| <i>Opuntia aurea</i> E.M. Baxter.                   | Cactaceae    | Accepted                                                                         |
| <i>Opuntia ficus-indica</i> (L.) Mill.              | Cactaceae    | Accepted                                                                         |
| <i>Opuntia fragilis</i> (Nutt.) Haw.                | Cactaceae    | Accepted                                                                         |
| <i>Opuntia humifusa</i> (Raf.) Raf.                 | Cactaceae    | Accepted                                                                         |
| <i>Opuntia phaeacantha</i> Engelm.                  | Cactaceae    | Accepted                                                                         |
| <i>Opuntia polyacantha</i> Haw.                     | Cactaceae    | Accepted                                                                         |
| <i>Orchis laxiflora</i>                             | Orchidaceae  | Synonym of <i>Anacamptis laxiflora</i> (Lam.) R.M.Bateman, Pridgeon & M.W.Chase. |
| <i>Organum x majoricum</i> Cambess.                 | Lamiaceae    | Accepted                                                                         |
| <i>Origanum dayi</i> Post.                          | Lamiaceae    | Accepted                                                                         |

|                                                                  |              |                                                               |
|------------------------------------------------------------------|--------------|---------------------------------------------------------------|
| <i>Origanum dictamnus</i> L.                                     | Lamiaceae    | Accepted                                                      |
| <i>Origanum laevigatum</i><br>'Herrenhausen'                     | Lamiaceae    | Variety of <i>Origanum laevigatum</i> Boiss.                  |
| <i>Origanum majorana</i> L.                                      | Lamiaceae    | Accepted                                                      |
| <i>Origanum onites</i> L.                                        | Lamiaceae    | Accepted                                                      |
| <i>Origanum vulgare</i> L.                                       | Lamiaceae    | Accepted                                                      |
| <i>Origanum vulgare</i> subsp. <i>hirtum</i><br>(Link) Ietsw.    | Lamiaceae    | Accepted                                                      |
| <i>Ornithogalum umbellatum</i> L.                                | Asparagaceae | Accepted                                                      |
| <i>Ornithopus perpusillus</i> L.                                 | Leguminosae  | Accepted                                                      |
| <i>Orostachys boehmeri</i>                                       | Crassulaceae | Unresolved                                                    |
| <i>Orthrosanthus chimboracensis</i><br>(Kunth) Baker             | Iridaceae    | Accepted                                                      |
| <i>Orthrosanthus multiflorus</i> Sweet                           | Iridaceae    | Accepted                                                      |
| <i>Oscularia deltoides</i> (L.) Schwantes                        | Aizoaceae    | Synonym of <i>Lampranthus deltoides</i> (L.) Glen ex Wijnands |
| <i>Osmanthus fragrans</i> Lour.                                  | Oleaceae     | Accepted                                                      |
| <i>Osmoxylon lineare</i> (Merr.) Philipson.                      | Araliaceae   | Accepted                                                      |
| <i>Otanthus maritimus</i> (L.) Hoffmanns.<br>& Link.             | Compositae   | Accepted                                                      |
| <i>Oxalis articulata</i> Savigny                                 | Oxalidaceae  | Accepted                                                      |
| <i>Oxalis conorrhiza</i> Jacq.                                   | Oxalidaceae  | Accepted                                                      |
| <i>Oxalis corniculata</i> L.                                     | Oxalidaceae  | Accepted                                                      |
| <i>Oxalis debilis</i> subsp. <i>corymbosa</i><br>(DC.) Lourteig. | Oxalidaceae  | Accepted                                                      |
| <i>Oxalis pes-caprae</i> L.                                      | Oxalidaceae  | Accepted                                                      |
| <i>Oxalis stricta</i> L.                                         | Oxalidaceae  | Accepted                                                      |
| <i>Oxytropis campestris</i> (L.) DC.                             | Leguminosae  | Accepted                                                      |
| <i>Oxytropis deflexa</i> (Pall.) DC.                             | Leguminosae  | Accepted                                                      |
| <i>Oxytropis lambertii</i> Pursh.                                | Leguminosae  | Accepted                                                      |
| <i>Pachyveria pachyphytoides</i>                                 | Crassulaceae | Unresolved                                                    |

|                                                                    |                 |                                                 |
|--------------------------------------------------------------------|-----------------|-------------------------------------------------|
| <i>Padus avium</i> Mill.                                           | Rosaceae        | Synonym of <i>Prunus padus</i> L.               |
| <i>Padus serotina</i> (Ehrh.) Borkh.                               | Rosaceae        | Synonym of <i>Prunus serotina</i> Ehrh.         |
| <i>Paliurus spina-christi</i> Mill.                                | Rhamnaceae      | Accepted                                        |
| <i>Pandanus amaryllifolius</i> Roxb.                               | Pandanaceae     | Accepted                                        |
| <i>Pandanus pygmaeus</i> Thouars.                                  | Pandanaceae     | Accepted                                        |
| <i>Panicum bergii</i> Arechav.                                     | Poaceae         | Accepted                                        |
| <i>Panicum dichotomiflorum</i> Michx.                              | Poaceae         | Accepted                                        |
| <i>Panicum hallii</i> Vasey.                                       | Poaceae         | Accepted                                        |
| <i>Panicum lanuginosum</i>                                         | Poaceae         | Synonym of <i>Panicum acuminatum</i> Sw.        |
| <i>Panicum leibergi</i> (Vasey) Scribn.                            | Poaceae         | Accepted                                        |
| <i>Panicum miliaceum</i> L.                                        | Poaceae         | Accepted                                        |
| <i>Panicum philadelphicum</i> Bernh. ex Trin.                      | Poaceae         | Accepted                                        |
| <i>Panicum virgatum</i> L.                                         | Poaceae         | Accepted                                        |
| <i>Papaver argemone</i> L.                                         | Papaveraceae    | Accepted                                        |
| <i>Papaver alpinum</i> L.                                          | Papaveraceae    | Accepted                                        |
| <i>Papaver carmeli</i>                                             | Papaveraceae    | Unresolved                                      |
| <i>Papaver dubium</i> L.                                           | Papaveraceae    | Accepted                                        |
| <i>Papaver rhoeas</i> L.                                           | Papaveraceae    | Accepted                                        |
| <i>Parietaria judaica</i> L.                                       | Urticaceae      | Accepted                                        |
| <i>Paronychia kapela</i> ssp. <i>serpyllifolia</i> (Chaix) Graebn. | Caryophyllaceae | Accepted                                        |
| <i>Parthenium hysterophorus</i> L.                                 | Compositae      | Accepted                                        |
| <i>Parthenocissus quinquefolia</i> (L.) Planch.                    | Vitaceae        | Accepted                                        |
| <i>Parthenium integrifolium</i> L.                                 | Compositae      | Accepted                                        |
| <i>Pascopyron smithii</i>                                          | Poaceae         | Synonym of <i>Elymus smithii</i> (Rydb.) Gould. |
| <i>Paspalum conjugatum</i> P.J.Bergius.                            | Poaceae         | Accepted                                        |
| <i>Paspalum dilatatum</i> Poir.                                    | Poaceae         | Accepted                                        |

|                                                                       |                |                                                       |
|-----------------------------------------------------------------------|----------------|-------------------------------------------------------|
| <i>Paspalum notatum</i> Flügge.                                       | Poaceae        | Accepted                                              |
| <i>Paspalum paniculatum</i> L.                                        | Poaceae        | Accepted                                              |
| <i>Paspalum setaceum</i> Michx.                                       | Poaceae        | Accepted                                              |
| <i>Paspalum vaginatum</i> Sw.                                         | Poaceae        | Accepted                                              |
| <i>Passiflora foetida</i> L.                                          | Passifloraceae | Accepted                                              |
| <i>Pedilanthus tithymaloides</i>                                      | Euphorbiaceae  | Synonym of <i>Euphorbia tithymaloides</i> L.          |
| <i>Pedilanthus tithymaloides</i> cv. 'Nanus'                          | Euphorbiaceae  | Variety of <i>Euphorbia tithymaloides</i> L.          |
| <i>Pediocactus simpsonii</i> (Engelm.) Britton & Rose.                | Cactaceae      | Accepted                                              |
| <i>Pelargonium</i> × <i>hortorum</i> L.H. Bailey.                     | Geraniaceae    | Accepted                                              |
| <i>Pelargonium odoratissimum</i> (L.) L'Hér.                          | Geraniaceae    | Accepted                                              |
| <i>Pelargonium rodneyanum</i>                                         | Geraniaceae    | Unresolved                                            |
| <i>Pennisetum alopecuroides</i> (L.) Spreng.                          | Poaceae        | Accepted                                              |
| <i>Pennisetum clandestinum</i> Hochst. ex Chiov.                      | Poaceae        | Accepted                                              |
| <i>Pennisetum purpureum</i> Schumach.                                 | Poaceae        | Accepted                                              |
| <i>Pennisetum setaceum</i> (Forssk.) Chiov.                           | Poaceae        | Accepted                                              |
| <i>Pennisetum x advena</i> 'Rebrum'                                   | Poaceae        | Variety of <i>Pennisetum advena</i> Wipff & Veldkamp. |
| <i>Penstemon angustifolius</i> Nutt. ex Pursh.                        | Plantaginaceae | Accepted                                              |
| <i>Penstemon barbatus</i> var. <i>praecox</i> f. <i>nanus</i> 'Rondo' | Plantaginaceae | Variety of <i>Penstemon barbatus</i> (Cav.) Roth.     |
| <i>Penstemon caespitosus</i> Nutt. ex A. Gray.                        | Plantaginaceae | Accepted                                              |
| <i>Penstemon cyananthus</i> Hook.                                     | Plantaginaceae | Accepted                                              |

|                                                                              |                |                                                    |
|------------------------------------------------------------------------------|----------------|----------------------------------------------------|
| <i>Penstemon digitalis</i> Nutt. ex Sims.                                    | Plantaginaceae | Accepted                                           |
| <i>Penstemon fendleri</i> Torr. & A. Gray.                                   | Plantaginaceae | Accepted                                           |
| <i>Penstemon grahamii</i> D.D. Keck ex E.H. Graham.                          | Plantaginaceae | Accepted                                           |
| <i>Penstemon grandiflora</i>                                                 | Plantaginaceae | Synonym of <i>Penstemon grandiflorus</i> Nutt.     |
| <i>Penstemon grandiflorus</i> Nutt.                                          | Plantaginaceae | Accepted                                           |
| <i>Penstemon heterophyllus</i> Lindl.                                        | Plantaginaceae | Accepted                                           |
| <i>Penstemon hirsutus</i> (L.) Willd.                                        | Plantaginaceae | Accepted                                           |
| <i>Penstemon linarioides</i> ssp. <i>coloradensis</i> (A. Nelson) D.D. Keck. | Plantaginaceae | Accepted                                           |
| <i>Penstemon pachyphyllus</i> A. Gray ex Rydb.                               | Plantaginaceae | Accepted                                           |
| <i>Penstemon pinifolius</i> Greene.                                          | Plantaginaceae | Accepted                                           |
| <i>Penstemon procerus</i> Douglas ex Graham.                                 | Plantaginaceae | Accepted                                           |
| <i>Penstemon secundiflorus</i> Benth.                                        | Plantaginaceae | Accepted                                           |
| <i>Penstemon strictus</i> Benth.                                             | Plantaginaceae | Accepted                                           |
| <i>Penstemon tenuiflorus</i> Pennell.                                        | Plantaginaceae | Accepted                                           |
| <i>Penstemon triflorus</i> A. Heller.                                        | Plantaginaceae | Accepted                                           |
| <i>Pentapogon quadrifidus</i> (Labill.) Baill.                               | Poaceae        | Accepted                                           |
| <i>Peperomia pellucida</i> (L.) Kunth.                                       | Piperaceae     | Accepted                                           |
| <i>Pernettya prostrata</i> (Cav.) DC.                                        | Ericaceae      | Synonym of <i>Gaultheria myrsinoides</i> Kunth     |
| <i>Perovskia atriplicifolia</i> 'Little Spire'                               | Lamiaceae      | Cultivar of <i>Perovskia atriplicifolia</i> Benth. |
| <i>Persicaria capitata</i> (Buch.-Ham. ex D.Don) H.Gross.                    | Polygonaceae   | Accepted                                           |
| <i>Persicaria lapathifolia</i> (L.) Delarbre                                 | Polygonaceae   | Accepted                                           |
| <i>Persicaria maculosa</i> Gray                                              | Polygonaceae   | Accepted                                           |
| <i>Persoonia daphnoides</i> A.Cunn. ex R.Br.                                 | Proteaceae     | Accepted                                           |



|                                                                |                 |                                              |
|----------------------------------------------------------------|-----------------|----------------------------------------------|
| <i>Persoonia oxycoccoides</i> Sieber ex Schult.                | Proteaceae      | Accepted                                     |
| <i>Petrophytum caespitosum</i> (Nutt. ex Torr. & A.Gray) Rydb. | Rosaceae        | Accepted                                     |
| <i>Petrorhagia prolifera</i> (L.) P.W.Ball & Heywood.          | Caryophyllaceae | Accepted                                     |
| <i>Petrorhagia saxifraga</i> (L.) Link.                        | Caryophyllaceae | Accepted                                     |
| <i>Petroselinum crispum</i> (Mill.) Fuss                       | Apiaceae        | Accepted                                     |
| <i>Petunia hybrid</i> 'Headliner Red Star'                     | Solanaceae      | Variety of <i>Petunia hybrida</i> Vilm.      |
| <i>Petunia hybrida</i> Vilm.                                   | Solanaceae      | Accepted                                     |
| <i>Peucedanum japonicum</i> Thunb.                             | Apiaceae        | Accepted                                     |
| <i>Peucedanum oreoselinum</i> (L.) Moench.                     | Apiaceae        | Accepted                                     |
| <i>Phacelia californica</i> Cham.                              | Boraginaceae    | Accepted                                     |
| <i>Phacelia campanularia</i> A. Gray.                          | Boraginaceae    | Accepted                                     |
| <i>Phagnalon saxatile</i> (L.) Cass.                           | Compositae      | Accepted                                     |
| <i>Phalaris arundinacea</i> L.                                 | Poaceae         | Accepted                                     |
| <i>Phaseolus vulgaris</i> L.                                   | Leguminosae     | Accepted                                     |
| <i>Phedimus aizoon</i> (L.) 't Hart                            | Crassulaceae    | Synonym of <i>Sedum aizoon</i> L.            |
| <i>Phedimus floriferus</i> cv. "Weihenstephaner Gold"          | Crassulaceae    | Synonym of <i>Sedum kamtschaticum</i> Fisch. |
| <i>Phedimus kamtschaticus</i>                                  | Crassulaceae    | Synonym of <i>Sedum kamtschaticum</i> Fisch. |
| <i>Phedimus selskianus</i> (Regel & Maack) 't Hart.            | Crassulaceae    | Accepted                                     |
| <i>Phedimus spurius</i>                                        | Crassulaceae    | Synonym of <i>Sedum spurium</i> M.Bieb.      |
| <i>Phedimus spurius</i> 'Leningrad White'                      | Crassulaceae    | Variety of <i>Sedum spurium</i> M.Bieb.      |
| <i>Phemeranthus calycinus</i>                                  | Talinaceae      | Synonym of <i>Talinum calycinum</i> Engelm.  |

|                                                          |                |                                                                      |
|----------------------------------------------------------|----------------|----------------------------------------------------------------------|
| <i>Phemeranthus teretifolius</i> (Pursh)<br>Raf.         | Montiaceae     | Accepted                                                             |
| <i>Phillyrea angustifolia</i> L.                         | Oleaceae       | Accepted                                                             |
| <i>Philodendron hastatum</i> K.Koch &<br>Sello.          | Araceae        | Accepted                                                             |
| <i>Philodendron warszewiczii</i> K.Koch<br>& C.D.Bouché. | Araceae        | Accepted                                                             |
| <i>Phleum boehmeri</i>                                   | Poaceae        | Synonym of <i>Phleum<br/>phleoides</i> (L.) H.Karst.                 |
| <i>Phleum pratense</i> L.                                | Poaceae        | Accepted                                                             |
| <i>Phlomis fruticosa</i> L.                              | Lamiaceae      | Accepted                                                             |
| <i>Phlomis lychnitis</i> L.                              | Lamiaceae      | Accepted                                                             |
| <i>Phlox bifida</i> 'Betty Blake'                        | Polemoniaceae  | Variety of <i>Phlox bifida</i><br>L.C. Beck.                         |
| <i>Phlox bifida</i> L.C. Beck.                           | Polemoniaceae  | Accepted                                                             |
| <i>Phlox divaricata</i> L.                               | Polemoniaceae  | Accepted                                                             |
| <i>Phlox douglasii</i> Hook.                             | Polemoniaceae  | Accepted                                                             |
| <i>Phlox pilosa</i> L.                                   | Polemoniaceae  | Accepted                                                             |
| <i>Phlox subulata</i> L.                                 | Polemoniaceae  | Accepted                                                             |
| <i>Photinia serrulata</i>                                | Rosaceae       | Synonym of <i>Photinia<br/>bodinieri</i> H.L,v.                      |
| <i>Phragmites communis</i>                               | Poaceae        | Synonym of <i>Phragmites<br/>australis</i> (Cav.) Trin. ex<br>Steud. |
| <i>Phragmites karka</i> (Retz.) Trin. ex<br>Steud.       | Poaceae        | Accepted                                                             |
| <i>Phyla nodiflora</i> (L.) Greene.                      | Verbenaceae    | Accepted                                                             |
| <i>Phyllanthus cochinchinensis</i> Spreng.               | Phyllanthaceae | Accepted                                                             |
| <i>Phyllanthus myrtifolius</i> (Wight)<br>Müll.Arg.      | Phyllanthaceae | Accepted                                                             |
| <i>Phyllanthus urinaria</i> L.                           | Phyllanthaceae | Accepted                                                             |
| <i>Physaria bellii</i> G.A. Mulligan.                    | Brassicaceae   | Accepted                                                             |
| <i>Phytolacca americana</i> L.                           | Phytolaccaceae |                                                                      |

|                                                       |                |                                                              |
|-------------------------------------------------------|----------------|--------------------------------------------------------------|
| <i>Picris echioides</i>                               | Compositae     | Synonym of<br><i>Helminthotheca echioides</i><br>(L.) Holub. |
| <i>Picris hieracioides</i> Sibth. & Sm.               | Compositae     | Accepted                                                     |
| <i>Pilea libanensis</i> Urb.                          | Urticaceae     | Unresolved                                                   |
| <i>Pilea microphylla</i> (L.) Liebm.                  | Urticaceae     | Accepted                                                     |
| <i>Pilosella officinarum</i> Vaill.                   | Compositae     | Accepted                                                     |
| <i>Pilosella rubra</i> (Peter) Soják.                 | Compositae     | Accepted                                                     |
| <i>Pimpinella saxifraga</i> L.                        | Apiaceae       | Accepted                                                     |
| <i>Pinus mugo</i> Turra.                              | Pinaceae       | Accepted                                                     |
| <i>Pinus taeda</i> L.                                 | Pinaceae       | Accepted                                                     |
| <i>Piper sarmentosum</i> Roxb.                        | Piperaceae     | Accepted                                                     |
| <i>Pisonia grandis</i> R. Br.                         | Nyctaginaceae  | Accepted                                                     |
| <i>Pistacia lentiscus</i> L.                          | Anacardiaceae  | Accepted                                                     |
| <i>Pisum sativum</i> L.                               | Leguminosae    | Accepted                                                     |
| <i>Pitosporum tobira</i> (Thunb.)<br>W.T.Aiton.       | Pittosporaceae | Accepted                                                     |
| <i>Pityrogramma calomelanos</i> (L.)<br>Link.         | Pteridaceae    | Accepted                                                     |
| Pixzee Peach                                          |                | No results                                                   |
| <i>Plagiobothrys nothofulvus</i> (A. Gray)<br>A. Gray | Boraginaceae   | Accepted                                                     |
| <i>Plantago afra</i> L.                               | Plantaginaceae | Accepted                                                     |
| <i>Plantago coronopus</i> L.                          | Plantaginaceae | Accepted                                                     |
| <i>Plantago erecta</i> E. Morris.                     | Plantaginaceae | Accepted                                                     |
| <i>Plantago gaudichaudii</i> Barnéoud                 | Plantaginaceae | Accepted                                                     |
| <i>Plantago lanceolata</i> L.                         | Plantaginaceae | Accepted                                                     |
| <i>Plantago major</i> L.                              | Plantaginaceae | Accepted                                                     |
| <i>Plantago marítima</i> L.                           | Plantaginaceae | Accepted                                                     |
| <i>Plantago maritima subsp serpentina</i>             | Plantaginaceae | Synonym of <i>Plantago maritima</i> L.                       |
| <i>Plantago media</i> L.                              | Plantaginaceae | Accepted                                                     |
| <i>Platylobium obtusangulum</i> Hook.                 | Leguminosae    | Accepted                                                     |

|                                                |                 |                                       |
|------------------------------------------------|-----------------|---------------------------------------|
| <i>Plectranthus amboinicus</i> (Lour.) Spreng. | Lamiaceae       | Accepted                              |
| <i>Plectranthus barbatus</i> Andrews           | Lamiaceae       | Accepted                              |
| <i>Plectranthus scutellarioides</i> (L.) R.Br. | Lamiaceae       | Accepted                              |
| <i>Plectranthus socotranus</i> A.R.Sm.         | Lamiaceae       | Accepted                              |
| <i>Pleurochaete squarrosa</i> (Brid.) Lindb.   | Pottiaceae      | Accepted                              |
| <i>Poa alpina</i> L.                           | Poaceae         | Accepted                              |
| <i>Poa annua</i> L.                            | Poaceae         | Accepted                              |
| <i>Poa badensis</i> Haenke ex Willd.           | Poaceae         | Accepted                              |
| <i>Poa bulbosa</i> L.                          | Poaceae         | Accepted                              |
| <i>Poa compressa</i> L.                        | Poaceae         | Accepted                              |
| <i>Poa fendleriana</i> (Steud.) Vasey.         | Poaceae         | Accepted                              |
| <i>Poa glauca</i> Vahl                         | Poaceae         | Accepted                              |
| <i>Poa hiemata</i> Vickery.                    | Poaceae         | Accepted                              |
| <i>Poa lanuginosa</i> Poir.                    | Poaceae         | Accepted                              |
| <i>Poa morrisii</i> Vickery                    | Poaceae         | Accepted                              |
| <i>Poa nemoralis</i> L.                        | Poaceae         | Accepted                              |
| <i>Poa pratensis</i> L.                        | Poaceae         | Accepted                              |
| <i>Poa pratensis</i> sp. <i>angustifolia</i>   | Poaceae         | Synonym of <i>Poa angustifolia</i> L. |
| <i>Poa trivialis</i> L.                        | Poaceae         | Accepted                              |
| <i>Podolepis jaceoides</i> (Sims) Voss         | Compositae      | Accepted                              |
| <i>Pogonatherum crinitum</i> (Thunb.) Kunth.   | Poaceae         | Accepted                              |
| <i>Pogostemon cablin</i> (Blanco) Benth.       | Lamiaceae       | Accepted                              |
| <i>Pohlia nutans</i> (Hedw.) Lindb.            | Bryaceae        | Accepted                              |
| <i>Polemonium reptans</i> L.                   | Polemoniaceae   | Accepted                              |
| <i>Polycarpon tetraphyllum</i> (L.) L.         | Caryophyllaceae | Accepted                              |
| <i>Polygala myrtifolia</i> L.                  | Polygalaceae    | Accepted                              |
| <i>Polygala verticillata</i> L.                | Polygalaceae    | Accepted                              |
| <i>Polygala vulgaris</i> L.                    | Polygalaceae    | Accepted                              |

|                                                      |                 |                                            |
|------------------------------------------------------|-----------------|--------------------------------------------|
| <i>Polygonum aviculare</i> L.                        | Polygonaceae    | Accepted                                   |
| <i>Polygonum persicaria</i> L.                       | Polygonaceae    | Synonym of <i>Persicaria maculosa</i> Gray |
| <i>Polygonum tenue</i> Michx.                        | Polygonaceae    | Accepted                                   |
| <i>Polypodium vulgare</i> L.                         | Polypodiaceae   | Accepted                                   |
| <i>Polystichum munitum</i> (Kaulf.) C. Presl.        | Dryopteridaceae | Accepted                                   |
| <i>Polytrichum commune</i> Hedw.                     | Polytrichaceae  | Accepted                                   |
| <i>Polytrichum juniperinum</i> Hedw.                 | Polytrichaceae  | Accepted                                   |
| <i>Polytrichum piliferum</i> Hedw.                   | Polytrichaceae  | Accepted                                   |
| <i>Populus alba</i> L.                               | Salicaceae      | Accepted                                   |
| <i>Populus deltoides</i> Marshall                    | Salicaceae      | Accepted                                   |
| <i>Populus tremula</i> L.                            | Salicaceae      | Accepted                                   |
| <i>Portulaca 'Hana Misteria'</i>                     | Portulacaceae   | No results                                 |
| <i>Portulaca gilliesii</i> Hook.                     | Portulacaceae   | Accepted                                   |
| <i>Portulaca grandiflora</i> Hook.                   | Portulacaceae   | Accepted                                   |
| <i>Portulaca maculate</i>                            | Portulacaceae   | No results                                 |
| <i>Portulaca oleracea</i> L.                         | Portulacaceae   | Accepted                                   |
| <i>Portulaca pilosa</i> L.                           | Portulacaceae   | Accepted                                   |
| <i>Portulacaria afra</i> f. <i>variegata</i>         | Didiereaceae    | Synonym of <i>Portulacaria afra</i> Jacq.  |
| <i>Portulacaria afra</i> Jacq.                       | Didiereaceae    | Accepted                                   |
| <i>Potentilla anserina</i> L.                        | Rosaceae        | Accepted                                   |
| <i>Potentilla argentea</i> L.                        | Rosaceae        | Accepted                                   |
| <i>Potentilla arguta</i> Pursh.                      | Rosaceae        | Accepted                                   |
| <i>Potentilla canadensis</i> L.                      | Rosaceae        | Accepted                                   |
| <i>Potentilla crantzii</i> (Crantz) Beck ex Fritsch. | Rosaceae        | Accepted                                   |
| <i>Potentilla erecta</i> (L.) Raeusch.               | Rosaceae        | Accepted                                   |
| <i>Potentilla hyparctica</i> Malte.                  | Rosaceae        | Accepted                                   |
| <i>Potentilla nepalensis</i> Hook.                   | Rosaceae        | Accepted                                   |
| <i>Potentilla neumanniana</i> Rchb.                  | Rosaceae        | Accepted                                   |
| <i>Potentilla norvegica</i> L.                       | Rosaceae        | Accepted                                   |

|                                                                                      |                  |                                               |
|--------------------------------------------------------------------------------------|------------------|-----------------------------------------------|
| <i>Potentilla pusilla</i> Host.                                                      | Rosaceae         | Accepted                                      |
| <i>Potentilla reptans</i> L.                                                         | Rosaceae         | Accepted                                      |
| <i>Potentilla tabernaemontani</i> Asch.                                              | Rosaceae         | Accepted                                      |
| <i>Potentilla verna</i>                                                              | Rosaceae         | Synonym of <i>Potentilla grandiflora</i> L.   |
| <i>Pouzolzia zeylanica</i> (L.) Benn.                                                | Urticaceae       | Accepted                                      |
| <i>Prasium majus</i> L.                                                              | Lamiaceae        | Accepted                                      |
| <i>Prenanthes trifoliolata</i>                                                       | Compositae       | Synonym of <i>Nabalus trifoliolatus</i> Cass. |
| <i>Primula acaulis</i> (L.) Hill                                                     | Primulaceae      | Synonym of <i>Primula vulgaris</i> Huds.      |
| <i>Primula veris</i> L.                                                              | Primulaceae      | Accepted                                      |
| <i>Primula vulgaris</i> Huds.                                                        | Primulaceae      | Accepted                                      |
| <i>Prostanthera aspalathoides</i> A.Cunn.<br>ex Benth.                               | Lamiaceae        | Accepted                                      |
| <i>Prostanthera incisa</i> R.Br.                                                     | Lamiaceae        | Accepted                                      |
| <i>Prostanthera nivea</i> A.Cunn. ex<br>Benth.                                       | Lamiaceae        | Accepted                                      |
| <i>Prunella grandiflora</i> (L.) Scholler.                                           | Lamiaceae        | Accepted                                      |
| <i>Prunella vulgaris</i> L.                                                          | Lamiaceae        | Accepted                                      |
| <i>Prunella vulgaris</i> subsp. <i>lanceolata</i><br>(W.P.C.Barton) Piper & Beattie. | Lamiaceae        | Accepted                                      |
| <i>Prunella vulgaris</i> subsp. <i>vulgaris</i>                                      | Lamiaceae        | Synonym of <i>Prunella vulgaris</i> L.        |
| <i>Prunus mahaleb</i> L.                                                             | Rosaceae         | Accepted                                      |
| <i>Prunus salicina</i> Lindl.                                                        | Rosaceae         | Accepted                                      |
| <i>Prunus spinosa</i> L.                                                             | Rosaceae         | Accepted                                      |
| <i>Pseudolysimachion spicatum</i>                                                    | Plantaginaceae   | Synonym of <i>Veronica spicata</i> L.         |
| <i>Pteridium aquilinum</i> var. <i>pubescens</i>                                     | Dennstaedtiaceae | No results                                    |
| <i>Pteris vittata</i> L.                                                             | Pteridaceae      | Accepted                                      |
| <i>Pterocypsela indica</i>                                                           | Compositae       | Synonym of <i>Lactuca indica</i> L.           |

|                                                                                   |               |                                                                 |
|-----------------------------------------------------------------------------------|---------------|-----------------------------------------------------------------|
| <i>Ptilotus exaltatus</i>                                                         | Amaranthaceae | Unresolved                                                      |
| <i>Ptilotus macrocephalus</i> (R. Br.) Poir.                                      | Amaranthaceae | Accepted                                                        |
| <i>Ptilotus spathulatus</i> (R. Br.) F. Muell.                                    | Amaranthaceae | Accepted                                                        |
| <i>Ptychostomum capillare</i> (Hedw.) D. T. Holyoak & N. Pedersen                 | Bryaceae      | Accepted                                                        |
| <i>Pulsatilla patens</i>                                                          | Ranunculaceae | Synonym of <i>Anemone patens</i> L.                             |
| <i>Pulsatilla vulgaris</i>                                                        | Ranunculaceae | Synonym of <i>Anemone pulsatilla</i> L.                         |
| <i>Punica granatum</i> L.                                                         | Lythraceae    | Accepted                                                        |
| <i>Puschkinia libanotica</i>                                                      | Asparagaceae  | Synonym of <i>Puschkinia scilloides</i> Adams.                  |
| <i>Putoria calabrica</i>                                                          | Rubiaceae     | Synonym of <i>Plocama calabrica</i> (L.f.) M.Backlund & Thulin. |
| <i>Pycnanthemum tenuifolium</i> Schrad.                                           | Lamiaceae     | Accepted                                                        |
| <i>Pycnanthemum virginianum</i> (L.) T.Durand & B.D.Jacks. ex B.L.Rob. & Fernald. | Lamiaceae     | Accepted                                                        |
| <i>Pycnosorus globosus</i> F.L.Bauer ex Benth.                                    | Compositae    | Accepted                                                        |
| <i>Pycnus flavidus</i> (Retz.) T.Koyama.                                          | Cyperaceae    | Accepted                                                        |
| <i>Pycnus polystachyos</i> (Rottb.) P.Beauv.                                      | Cyperaceae    | Accepted                                                        |
| <i>Pycnus pumilus</i> (L.) Nees.                                                  | Cyperaceae    | Accepted                                                        |
| <i>Pyrus communis</i> L.                                                          | Rosaceae      | Accepted                                                        |
| <i>Pyrus pyraister</i> (L.) Burgsd.                                               | Rosaceae      | Accepted                                                        |
| <i>Quercus petraea</i> (Matt.) Liebl.                                             | Fagaceae      | Accepted                                                        |
| <i>Quercus robur</i> L.                                                           | Fagaceae      | Accepted                                                        |
| <i>Racomitrium canescens</i>                                                      | Grimmiaceae   | Synonym of <i>Niphotrichum canescens</i>                        |

|                                                                  |               |                                                                           |
|------------------------------------------------------------------|---------------|---------------------------------------------------------------------------|
|                                                                  |               | (Hedw.) Bednarek-Ochyra & Ochyra.                                         |
| <i>Ranunculus acris</i> L.                                       | Ranunculaceae | Accepted                                                                  |
| <i>Ranunculus bulbosus</i> L.                                    | Ranunculaceae | Accepted                                                                  |
| <i>Ranunculus californicus</i> Benth.                            | Ranunculaceae | Accepted                                                                  |
| <i>Ranunculus polyanthemus</i> L.                                | Ranunculaceae | Accepted                                                                  |
| <i>Ranunculus repens</i> L.                                      | Ranunculaceae | Accepted                                                                  |
| <i>Ranunculus scandicinus</i>                                    | Ranunculaceae | Unresolved                                                                |
| <i>Raphanus raphanistrum</i> subsp.<br><i>sativus</i> (L.) Domin | Brassicaceae  | Accepted                                                                  |
| <i>Raphanus sativus</i>                                          | Brassicaceae  | Synonym of <i>Raphanus raphanistrum</i> subsp. <i>sativus</i> (L.) Domin. |
| <i>Ratibida columnifera</i> (Nutt.) Wooton & Standl.             | Compositae    | Accepted                                                                  |
| <i>Ratibida pinnata</i> (Vent.) Barnhart.                        | Compositae    | Accepted                                                                  |
| <i>Ravenea rivularis</i> Jum. & H.Perrier                        | Arecaceae     | Accepted                                                                  |
| <i>Reichardia picroides</i> (L.) Roth                            | Compositae    | Accepted                                                                  |
| <i>Reseda alba</i> L.                                            | Resedaceae    | Accepted                                                                  |
| <i>Reseda lutea</i> L.                                           | Resedaceae    | Accepted                                                                  |
| <i>Reseda odorata</i> L.                                         | Resedaceae    | Accepted                                                                  |
| <i>Rhinanthus minor</i> L.                                       | Orobanchaceae | Accepted                                                                  |
| <i>Rhodanthe anthemoides</i> (Sieber ex Spreng.) Paul G.Wilson.  | Compositae    | Accepted                                                                  |
| <i>Rhodiola pachyclados</i> (Aitch. & Hemsl.) H. Ohba.           | Crassulaceae  | Accepted                                                                  |
| <i>Rhodiola rosea</i>                                            | Crassulaceae  | Synonym of <i>Sedum roseum</i> (L.) Scop.                                 |
| <i>Rhodiola trollii</i>                                          | Crassulaceae  | No results                                                                |
| <i>Rhododendron simsii</i> Planch.                               | Ericaceae     | Accepted                                                                  |
| <i>Rhodomyrtus tomentosa</i> (Aiton) Hassk.                      | Myrtaceae     | Accepted                                                                  |



|                                                                    |                 |                                                                                                     |
|--------------------------------------------------------------------|-----------------|-----------------------------------------------------------------------------------------------------|
| <i>Rhoeo spathaceo</i>                                             | Commelinaceae   | Synonym of <i>Tradescantia spathacea</i> Sw.                                                        |
| <i>Rhoeo spathaceo</i> cv. <i>compacta</i>                         | Commelinaceae   | Synonym of <i>Tradescantia spathacea</i> Sw.                                                        |
| <i>Rhynchospora nervosa</i> (Vahl)<br>Boeckeler                    | Cyperaceae      | Accepted                                                                                            |
| <i>Ribes speciosum</i> Pursh.                                      | Grossulariaceae | Accepted                                                                                            |
| <i>Ricotia lunaria</i> (L.) DC.                                    | Brassicaceae    | Accepted                                                                                            |
| <i>Robinia pseudoacacia</i> L.                                     | Leguminosae     | Accepted                                                                                            |
| <i>Rorippa indica</i> (L.) Hiern                                   | Brassicaceae    | Accepted                                                                                            |
| <i>Rosa californica</i> Cham. & Schltdl.                           | Rosaceae        | Accepted                                                                                            |
| <i>Rosa canina</i> L.                                              | Rosaceae        | Accepted                                                                                            |
| <i>Rosa carolina</i> L.                                            | Rosaceae        | Accepted                                                                                            |
| <i>Rosa luciae</i> Franch. & Rochebr.                              | Rosaceae        | Accepted                                                                                            |
| <i>Rosmarinus officinalis</i> L.                                   | Lamiaceae       | Accepted                                                                                            |
| <i>Rubia peregrina</i> L.                                          | Rubiaceae       | Accepted                                                                                            |
| <i>Rubus canescens</i> DC.                                         | Rosaceae        | Accepted                                                                                            |
| <i>Rubus flagellaris</i> Willd.                                    | Rosaceae        | Accepted                                                                                            |
| <i>Rubus parvifolius</i> L.                                        | Rosaceae        | Accepted                                                                                            |
| <i>Rubus plicatus</i> Weihe & Nees                                 | Rosaceae        | Accepted                                                                                            |
| <i>Rubus ursinus</i> Cham. & Schltdl.                              | Rosaceae        | Accepted                                                                                            |
| <i>Rudbeckia fulgida</i> Aiton.                                    | Compositae      | Accepted                                                                                            |
| <i>Rudbeckia fulgida</i> var. <i>deamii</i><br>(S.F.Blake) Perdue. | Compositae      | Accepted                                                                                            |
| <i>Rudbeckia hirta</i> L.                                          | Compositae      | Accepted                                                                                            |
| <i>Rudbeckia laciniata</i> L.                                      | Compositae      | Accepted                                                                                            |
| <i>Rudbeckia speciosa</i> Schrad.                                  | Compositae      | Accepted                                                                                            |
| <i>Rudbeckia subtomentosa</i> Pursh.                               | Compositae      | Accepted                                                                                            |
| <i>Rudbeckia sullivantii</i> ‘Goldsturm’                           | Compositae      | Synonym of <i>Rudbeckia fulgida</i> var. <i>sullivantii</i><br>(C.L.Boynton & Beadle)<br>Cronquist. |
| <i>Rudbeckia triloba</i> L.                                        | Compositae      | Accepted                                                                                            |

|                                                                    |                 |                                                            |
|--------------------------------------------------------------------|-----------------|------------------------------------------------------------|
| <i>Ruellia brittoniana</i>                                         | Acanthaceae     | Synonym of <i>Ruellia simplex</i> C.Wright.                |
| <i>Ruellia humilis</i> Nutt.                                       | Acanthaceae     | Accepted                                                   |
| <i>Rumex acetosella</i> L.                                         | Polygonaceae    | Accepted                                                   |
| <i>Rumex crispus</i> L.                                            | Polygonaceae    | Accepted                                                   |
| <i>Rumex dumosus</i> A.Cunn. ex Meisn.                             | Polygonaceae    | Accepted                                                   |
| <i>Rumex obtusifolius</i> L.                                       | Polygonaceae    | Accepted                                                   |
| <i>Rumex scutatus</i> L.                                           | Polygonaceae    | Accepted                                                   |
| <i>Ruschia pulvinaris</i> L. Bolus                                 | Aizoaceae       | Accepted                                                   |
| <i>Rutidosis leptorhynchoides</i> F.Muell.                         | Compositae      | Accepted                                                   |
| <i>Rytidosperma caespitosum</i><br>(Gaudich.) Connor & Edgar       | Poaceae         | Accepted                                                   |
| <i>Rytidosperma fulvum</i> (Vickery)<br>A.M.Humphreys & H.P.Linder | Poaceae         | Unresolved                                                 |
| <i>Rytidosperma racemosum</i> (R.Br.)<br>Connor & Edgar            | Poaceae         | Accepted                                                   |
| <i>Rytidosperma setaceum</i> (R.Br.)<br>Connor & Edgar             | Poaceae         | Accepted                                                   |
| <i>Sabatia angularis</i> (L.) Pursh.                               | Gentianaceae    | Accepted                                                   |
| <i>Sacciolepis indica</i> (L.) Chase                               | Poaceae         | Accepted                                                   |
| <i>Sagina procumbens</i> L.                                        | Caryophyllaceae | Accepted                                                   |
| <i>Sagina subulata</i> (Sw.) C.Presl                               | Caryophyllaceae | Accepted                                                   |
| <i>Salsola inermis</i> Forssk.                                     | Amaranthaceae   | Accepted                                                   |
| <i>Salvia</i> × <i>sylvestris</i> 'Blauhügel'                      | Lamiaceae       | Variety of <i>Salvia</i> × <i>sylvestris</i> L.            |
| <i>Salvia azurea</i> Michx. ex Vahl.                               | Lamiaceae       | Accepted                                                   |
| <i>Salvia cryptantha</i>                                           | Lamiaceae       | Synonym of <i>Salvia absconditiflora</i> Greuter & Burdet. |
| <i>Salvia elegans</i> Vahl                                         | Lamiaceae       | Accepted                                                   |
| <i>Salvia</i> 'Eskihar'                                            | Lamiaceae       | No results                                                 |
| <i>Salvia fruticosa</i> Mill.                                      | Lamiaceae       | Accepted                                                   |

|                                                    |              |                                                  |
|----------------------------------------------------|--------------|--------------------------------------------------|
| <i>Salvia guaranitica</i> A.St.-Hil. ex Benth.     | Lamiaceae    | Synonym of <i>Salvia coerulea</i> Benth.         |
| <i>Salvia greggii</i> A.Gray.                      | Lamiaceae    | Accepted                                         |
| <i>Salvia mellifera</i> Greene.                    | Lamiaceae    | Accepted                                         |
| <i>Salvia nemorosa</i> L.                          | Lamiaceae    | Accepted                                         |
| <i>Salvia dorrii</i> (Kellogg) Abrams              | Lamiaceae    | Accepted                                         |
| <i>Salvia officinalis</i> 'Berggarten'             | Lamiaceae    | Variety of <i>Salvia officinalis</i> L.          |
| <i>Salvia officinalis</i> L.                       | Lamiaceae    | Accepted                                         |
| <i>Salvia pachyphylla</i> Epling ex Munz.          | Lamiaceae    | Accepted                                         |
| <i>Salvia plebeia</i> R.Br.                        | Lamiaceae    | Accepted                                         |
| <i>Salvia pratensis</i> L.                         | Lamiaceae    | Accepted                                         |
| <i>Salvia rosmarinus</i> Schleid.                  | Lamiaceae    | Synonym of <i>Rosmarinus officinalis</i> L.      |
| <i>Salvia scutellarioides</i> Kunth                | Lamiaceae    | Accepted                                         |
| <i>Salvia sonomensis</i> Greene.                   | Lamiaceae    | Accepted                                         |
| <i>Salvia spathacea</i> Greene.                    | Lamiaceae    | Accepted                                         |
| <i>Salvia verticillata</i> L.                      | Lamiaceae    | Accepted                                         |
| <i>Salvia xeropapillosa</i> Fern.Alonso            | Lamiaceae    | Accepted                                         |
| <i>Sambucus nigra</i> L.                           | Adoxaceae    | Accepted                                         |
| <i>Sanchezia oblonga</i> Ruiz & Pav.               | Acanthaceae  | Accepted                                         |
| <i>Sanguisorba minor</i> Scop.                     | Rosaceae     | Accepted                                         |
| <i>Sanguisorba minor</i> ssp. <i>minor</i>         | Rosaceae     | Synonym of <i>Sanguisorba minor</i> Scop.        |
| <i>Sanguisorba tenuifolia</i> 'Purpurea'           | Rosaceae     | Unresolved                                       |
| <i>Sansevieria</i> 'Alva'                          | Asparagaceae | No results                                       |
| <i>Sansevieria cylindrica</i> Bojer ex Hook.       | Asparagaceae | Accepted                                         |
| <i>Sansevieria ehrenbergii</i> Schweinf. ex Baker. | Asparagaceae | Accepted                                         |
| <i>Sansevieria hahnii</i> hort.                    | Asparagaceae | Unresolved                                       |
| <i>Sansevieria trifasciata</i> 'Laurentii'         | Asparagaceae | Synonym of <i>Sansevieria trifasciata</i> Prain. |

|                                                                          |                 |                                                                    |
|--------------------------------------------------------------------------|-----------------|--------------------------------------------------------------------|
| <i>Sansevieria trifasciata</i> cv. <i>hahnii</i>                         | Asparagaceae    | Variety of <i>Sansevieria trifasciata</i> Prain.                   |
| <i>Sansevieria trifasciata</i> Prain.                                    | Asparagaceae    | Accepted                                                           |
| <i>Santolina chamaecyparissus</i> L.                                     | Compositae      | Accepted                                                           |
| <i>Santolina rosmarinifolia</i> L.                                       | Compositae      | Accepted                                                           |
| <i>Saponaria ocymoides</i> L.                                            | Caryophyllaceae | Accepted                                                           |
| <i>Sarcococca hookeriana</i> var. <i>humilis</i><br>Rehder & E.H. Wilson | Buxaceae        | Synonym of <i>Sarcococca hookeriana</i> var. <i>digyna</i> Franch. |
| <i>Satureja montana</i> L.                                               | Lamiaceae       | Accepted                                                           |
| <i>Satureja repandens</i>                                                | Lamiaceae       | No results                                                         |
| <i>Satureja subspicata</i> Bartl. ex Vis.                                | Lamiaceae       | Accepted                                                           |
| <i>Satureja thymbra</i> L.                                               | Lamiaceae       | Accepted                                                           |
| <i>Satureja vulgaris</i>                                                 | Lamiaceae       | Synonym of <i>Clinopodium vulgare</i> L.                           |
| <i>Saxifraga arendsii</i>                                                | Saxifragaceae   | No results                                                         |
| <i>Saxifraga cespitosa</i> L.                                            | Saxifragaceae   | Accepted                                                           |
| <i>Saxifraga cotyledon</i> L.                                            | Saxifragaceae   | Accepted                                                           |
| <i>Saxifraga granulata</i> L.                                            | Saxifragaceae   | Accepted                                                           |
| <i>Saxifraga paniculata</i> Mill.                                        | Saxifragaceae   | Accepted                                                           |
| <i>Saxifraga tridactylites</i> L.                                        | Saxifragaceae   | Accepted                                                           |
| <i>Scabiosa columbaria</i> L.                                            | Caprifoliaceae  | Accepted                                                           |
| <i>Scabiosa prolifera</i>                                                | Caprifoliaceae  | Unresolved                                                         |
| <i>Scaevola aemula</i> R.Br.                                             | Goodeniaceae    | Unresolved                                                         |
| <i>Scaevola albida</i> (Sm.) Druce                                       | Goodeniaceae    | Unresolved                                                         |
| <i>Scaevola taccada</i> (Gaertn.) Roxb.                                  | Goodeniaceae    | Accepted                                                           |
| <i>Schefflera arboricola</i> (Hayata) Merr.                              | Araliaceae      | Accepted                                                           |
| <i>Schefflera heptaphylla</i> (L.) Frodin.                               | Araliaceae      | Accepted                                                           |
| <i>Schizachyrium condensatum</i> (Kunth)<br>Nees.                        | Poaceae         | Accepted                                                           |
| <i>Schizachyrium scoparium</i> (Michx.)<br>Nash.                         | Poaceae         | Accepted                                                           |
| <i>Schizocentron elegans</i>                                             | Melastomataceae | Unresolved                                                         |

|                                                                           |                  |                                                                       |
|---------------------------------------------------------------------------|------------------|-----------------------------------------------------------------------|
| <i>Schkuhria pinnata</i> (Lam.) Kuntze ex Thell.                          | Compositae       | Accepted                                                              |
| <i>Scilla autumnalis</i>                                                  | Asparagaceae     | Synonym of <i>Prospero autumnale</i> (L.) Speta.                      |
| <i>Scilla siberica</i> Haw.                                               | Asparagaceae     | Accepted                                                              |
| <i>Scirpus cespitosus</i>                                                 | Cyperaceae       | Synonym of <i>Trichophorum cespitosum</i> (L.) Hartm.                 |
| <i>Scirpus cyperinus</i> (L.) Kunth                                       | Cyperaceae       | Accepted                                                              |
| <i>Scirpus grossus</i>                                                    | Cyperaceae       | Synonym of <i>Actinoscirpus grossus</i> (L.f.) Goetgh. & D.A.Simpson. |
| <i>Scirpus juncoides</i>                                                  | Cyperaceae       | Synonym of <i>Schoenoplectiella juncoides</i> (Roxb.) Lye.            |
| <i>Scleranthus annuus</i> subsp. <i>polycarpus</i> (L.) Bonnier & Layens. | Caryophyllaceae  | Accepted                                                              |
| <i>Scleranthus biflorus</i> (J.R. Forst. & G. Forst.) Hook. f.            | Caryophyllaceae  | Synonym of <i>Mniarum biflorum</i> J.R. Forst. & G. Forst.            |
| <i>Scleria triglomerata</i> Michx.                                        | Cyperaceae       | Accepted                                                              |
| <i>Scoparia dulcis</i> L.                                                 | Plantaginaceae   | Accepted                                                              |
| <i>Scoparia montevidensis</i> (Spreng.) R.E. Fr.                          | Plantaginaceae   | Accepted                                                              |
| <i>Scrophularia californica</i> Cham. & Schltdl.                          | Scrophulariaceae | Accepted                                                              |
| <i>Scrophularia canina</i> L.                                             | Scrophulariaceae | Accepted                                                              |
| <i>Scrophularia peregrina</i> L.                                          | Scrophulariaceae | Accepted                                                              |
| <i>Scutellaria prostrata</i> Jacquem. ex Benth.                           | Lamiaceae        | Accepted                                                              |
| <i>Scutellaria resinosa</i> Torr.                                         | Lamiaceae        | Accepted                                                              |

|                                                     |              |                                          |
|-----------------------------------------------------|--------------|------------------------------------------|
| <i>Scutellaria scordifolia</i> Fisch. ex Schrank.   | Lamiaceae    | Accepted                                 |
| <i>Scutellaria serrata</i> Andrews.                 | Lamiaceae    | Accepted                                 |
| <i>Sedaveria 'Pats Pink'</i>                        | Crassulaceae | Accepted                                 |
| <i>Sedum 'Herbstfreude'</i>                         | Crassulaceae | No results                               |
| <i>Sedum 'Rockery Challenger'</i>                   | Crassulaceae | No results                               |
| <i>Sedum 'Spiral Staircase'</i>                     | Crassulaceae | No results                               |
| <i>Sedum acre 'Aureum'</i>                          | Crassulaceae | Variety of <i>Sedum acre</i> L.          |
| <i>Sedum acre 'Golden Carpet'</i>                   | Crassulaceae | Variety of <i>Sedum acre</i> L.          |
| <i>Sedum acre 'Golden Queen'</i>                    | Crassulaceae | Variety of <i>Sedum acre</i> L.          |
| <i>Sedum acre 'Minor'</i>                           | Crassulaceae | Variety of <i>Sedum acre</i> L.          |
| <i>Sedum acre 'Oktoberfest'</i>                     | Crassulaceae | Variety of <i>Sedum acre</i> L.          |
| <i>Sedum acre</i> L.                                | Crassulaceae | Accepted                                 |
| <i>Sedum adolphii</i> Raym.-Hamet.                  | Crassulaceae | Accepted                                 |
| <i>Sedum aizoon</i> L.                              | Crassulaceae | Accepted                                 |
| <i>Sedum album 'Bella d'Inverno'</i>                | Crassulaceae | Variety of <i>Sedum album</i> L.         |
| <i>Sedum album 'Coral Carpet'</i>                   | Crassulaceae | Variety of <i>Sedum album</i> L.         |
| <i>Sedum album 'France' white stonecrop</i>         | Crassulaceae | Variety of <i>Sedum album</i> L.         |
| <i>Sedum album 'Red Ice'</i>                        | Crassulaceae | Variety of <i>Sedum album</i> L.         |
| <i>Sedum album</i> L.                               | Crassulaceae | Accepted                                 |
| <i>Sedum album</i> subsp. <i>album</i>              | Crassulaceae | Synonym of <i>Sedum album</i> L.         |
| <i>Sedum amplexicaule</i> subsp. <i>tenuifolium</i> | Crassulaceae | Synonym of <i>Sedum amplexicaule</i> DC. |
| <i>Sedum anglicum</i> Huds.                         | Crassulaceae | Accepted                                 |
| <i>Sedum annuum</i> L.                              | Crassulaceae | Accepted                                 |
| <i>Sedum blue</i>                                   | Crassulaceae | No results                               |
| <i>Sedum boehmeri</i>                               | Crassulaceae | Unresolved                               |
| <i>Sedum caeruleum</i> L.                           | Crassulaceae | Accepted                                 |

|                                                              |              |                                              |
|--------------------------------------------------------------|--------------|----------------------------------------------|
| <i>Sedum cauticola</i>                                       | Crassulaceae | Unresolved                                   |
| <i>Sedum cauticola</i> 'Lidakense'                           | Crassulaceae | Unresolved                                   |
| <i>Sedum chatre</i>                                          | Crassulaceae | No results                                   |
| <i>Sedum clavatum</i> R.T. Clausen.                          | Crassulaceae | Accepted                                     |
| <i>Sedum confusum</i> Hemsl.                                 | Crassulaceae | Accepted                                     |
| <i>Sedum cyaneum</i> J. Rudolph.                             | Crassulaceae | Accepted                                     |
| <i>Sedum dasyphyllum</i> 'Burnati'                           | Crassulaceae | Variety of <i>Sedum dasyphyllum</i> L.       |
| <i>Sedum dasyphyllum</i> 'Lilac Mound'                       | Crassulaceae | Variety of <i>Sedum dasyphyllum</i> L.       |
| <i>Sedum dasyphyllum</i> L.                                  | Crassulaceae | Accepted                                     |
| <i>Sedum dasyphyllum</i> var. <i>dasyphyllum</i>             | Crassulaceae | No results                                   |
| <i>Sedum dasyphyllum</i> var. <i>glanduliferum</i>           | Crassulaceae | No results                                   |
| <i>Sedum diffusum</i> S. Watson.                             | Crassulaceae | Accepted                                     |
| <i>Sedum divergens</i> S. Watson.                            | Crassulaceae | Accepted                                     |
| <i>Sedum ellacombianum</i>                                   | Crassulaceae | Synonym of <i>Sedum kamtschaticum</i> Fisch. |
| <i>Sedum ewersii</i> Ledeb.                                  | Crassulaceae | Accepted                                     |
| <i>Sedum fino</i>                                            | Crassulaceae | No results                                   |
| <i>Sedum floriferum</i>                                      | Crassulaceae | Synonym of <i>Sedum kamtschaticum</i> Fisch. |
| <i>Sedum forsterianum</i> Sm.                                | Crassulaceae | Accepted                                     |
| <i>Sedum forsterianum</i> ssp. <i>elegans</i> 'Silver Stone' | Crassulaceae | Synonym of <i>Sedum forsterianum</i> Sm.     |
| <i>Sedum glaucophyllum</i> R.T. Clausen.                     | Crassulaceae | Accepted                                     |
| <i>Sedum gypsicola</i> Boiss. & Reut.                        | Crassulaceae | Accepted                                     |
| <i>Sedum hispanicum</i> 'Silver Carpet'                      | Crassulaceae | Variety of <i>Sedum hispanicum</i> L.        |
| <i>Sedum hispanicum</i> L.                                   | Crassulaceae | Accepted                                     |
| <i>Sedum hispanicum</i> var. <i>hispanicum</i>               | Crassulaceae | No results                                   |

|                                                       |              |                                                               |
|-------------------------------------------------------|--------------|---------------------------------------------------------------|
| <i>Sedum hybridum</i> 'Czar's Gold'                   | Crassulaceae | Variety of <i>Sedum hybridum</i> L.                           |
| <i>Sedum hybridum</i> L.                              | Crassulaceae | Accepted                                                      |
| <i>Sedum japonicum</i> Siebold ex Miq.                | Crassulaceae | Accepted                                                      |
| <i>Sedum kamtschaticum</i><br>'ellacombianum'         | Crassulaceae | Synonym of <i>Sedum kamtschaticum</i> Fisch.                  |
| <i>Sedum kamtschaticum</i> Fisch.                     | Crassulaceae | Accepted                                                      |
| <i>Sedum kamtschaticum</i> var.<br><i>floriferum</i>  | Crassulaceae | No results                                                    |
| <i>Sedum lanceolatum</i> Torr.                        | Crassulaceae | Accepted                                                      |
| <i>Sedum lineare</i> 'Variegatum'                     | Crassulaceae | Variety of <i>Sedum lineare</i> Thunb.                        |
| <i>Sedum lineare</i> cv. 'robustum'                   | Crassulaceae | Variety of <i>Sedum lineare</i> Thunb.                        |
| <i>Sedum lineare</i> Thunb.                           | Crassulaceae | Accepted                                                      |
| <i>Sedum litoreum</i> Guss.                           | Crassulaceae | Accepted                                                      |
| <i>Sedum lydium</i> Boiss.                            | Crassulaceae | Accepted                                                      |
| <i>Sedum makinoi</i> Maxim.                           | Crassulaceae | Accepted                                                      |
| <i>Sedum mexicanum</i> Britton.                       | Crassulaceae | Accepted                                                      |
| <i>Sedum middendorffianum</i>                         | Crassulaceae | Synonym of <i>Phedimus middendorffianus</i> (Maxim.) 't Hart. |
| <i>Sedum middendorffianum</i> var.<br><i>diffusum</i> | Crassulaceae | Synonym of <i>Phedimus middendorffianus</i> (Maxim.) 't Hart. |
| <i>Sedum montanum</i> Songeon & E.P.Perrier.          | Crassulaceae | Accepted                                                      |
| <i>Sedum montanum</i> ssp. <i>orientale</i> 't Hart.  | Crassulaceae | Accepted                                                      |
| <i>Sedum moranense</i> Kunth.                         | Crassulaceae | Accepted                                                      |
| <i>Sedum nevii</i> 'glaucophyllum'                    | Crassulaceae | No results                                                    |
| <i>Sedum nussbaumerianum</i> Bitter.                  | Crassulaceae | Accepted                                                      |
| <i>Sedum obtusifolium</i> var. <i>listoniae</i>       | Crassulaceae | No results                                                    |



|                                              |              |                                                                  |
|----------------------------------------------|--------------|------------------------------------------------------------------|
| <i>Sedum ochroleucum</i> Chaix.              | Crassulaceae | Accepted                                                         |
| <i>Sedum oreganum</i> Nutt.                  | Crassulaceae | Accepted                                                         |
| <i>Sedum oregonense</i> (S. Watson) M. Peck. | Crassulaceae | Accepted                                                         |
| <i>Sedum oryzifolium</i>                     | Crassulaceae | Unresolved                                                       |
| <i>Sedum pachyclados</i>                     | Crassulaceae | Synonym of <i>Rhodiola pachyclados</i> (Aitch. & Hemsl.) H. Ohba |
| <i>Sedum pachyphyllum</i> Rose.              | Crassulaceae | Accepted                                                         |
| <i>Sedum pallidum</i> M.Bieb                 | Crassulaceae | Accepted                                                         |
| <i>Sedum palmieri</i> S. Watson.             | Crassulaceae | Accepted                                                         |
| <i>Sedum populifolium</i> Pall.              | Crassulaceae | Accepted                                                         |
| <i>Sedum pulchellum</i> Michx.               | Crassulaceae | Accepted                                                         |
| <i>Sedum reflexum</i>                        | Crassulaceae | Synonym of <i>Sedum rupestre</i> L.                              |
| <i>Sedum reflexum</i> 'Blue Spruce'          | Crassulaceae | Variety of <i>Sedum rupestre</i> L.                              |
| <i>Sedum requieni</i>                        | Crassulaceae | No results                                                       |
| <i>Sedum roseum</i> (L.) Scop.               | Crassulaceae | Accepted                                                         |
| <i>Sedum rubens</i> L.                       | Crassulaceae | Accepted                                                         |
| <i>Sedum rubens</i> var. <i>rubens</i>       | Crassulaceae | No results                                                       |
| <i>Sedum rubrotinctum</i> R.T. Clausen.      | Crassulaceae | Accepted                                                         |
| <i>Sedum rupestre</i> 'Angelina'             | Crassulaceae | Variety of <i>Sedum rupestre</i> L.                              |
| <i>Sedum rupestre</i> L.                     | Crassulaceae | Accepted                                                         |
| <i>Sedum sarmentosum</i> Bunge.              | Crassulaceae | Accepted                                                         |
| <i>Sedum sediforme</i> (Jacq.) Pau.          | Crassulaceae | Accepted                                                         |
| <i>Sedum selskianum</i>                      | Crassulaceae | Synonym of <i>Phedimus selskianus</i> (Regel & Maack) 't Hart.   |
| <i>Sedum sexangulare</i> L.                  | Crassulaceae | Accepted                                                         |
| <i>Sedum sieboldii</i> Regel.                | Crassulaceae | Accepted                                                         |

|                                                     |              |                                              |
|-----------------------------------------------------|--------------|----------------------------------------------|
| <i>Sedum spathulifolium</i> ‘ var. <i>purpureum</i> | Crassulaceae | Variety of <i>Sedum spathulifolium</i> Hook. |
| <i>Sedum spathulifolium</i> Hook.                   | Crassulaceae | Accepted                                     |
| <i>Sedum spectabile</i> Boreau.                     | Crassulaceae | Accepted                                     |
| <i>Sedum spurium</i> (Dragon’s Blood)               | Crassulaceae | Variety of <i>Sedum spurium</i> M.Bieb.      |
| <i>Sedum spurium</i> ‘Coccineum’                    | Crassulaceae | Variety of <i>Sedum spurium</i> M.Bieb.      |
| <i>Sedum spurium</i> ‘Fuldaglut’                    | Crassulaceae | Variety of <i>Sedum spurium</i> M.Bieb.      |
| <i>Sedum spurium</i> ‘Green Mantle                  | Crassulaceae | Variety of <i>Sedum spurium</i> M.Bieb.      |
| <i>Sedum spurium</i> ‘John Creech’                  | Crassulaceae | Variety of <i>Sedum spurium</i> M.Bieb.      |
| <i>Sedum spurium</i> ‘Roseum’                       | Crassulaceae | Variety of <i>Sedum spurium</i> M.Bieb.      |
| <i>Sedum spurium</i> ‘Schorbuser Blut’              | Crassulaceae | Variety of <i>Sedum spurium</i> M.Bieb.      |
| <i>Sedum spurium</i> ‘Splendens’                    | Crassulaceae | Variety of <i>Sedum spurium</i> M.Bieb.      |
| <i>Sedum spurium</i> ‘Summer glory’                 | Crassulaceae | Variety of <i>Sedum spurium</i> M.Bieb.      |
| <i>Sedum spurium</i> ‘Tricolor’                     | Crassulaceae | Variety of <i>Sedum spurium</i> M.Bieb.      |
| <i>Sedum spurium</i> ‘Voodoo’                       | Crassulaceae | Variety of <i>Sedum spurium</i> M.Bieb.      |
| <i>Sedum spurium</i> ‘White Form’                   | Crassulaceae | Variety of <i>Sedum spurium</i> M.Bieb.      |
| <i>Sedum spurium atropurpureum</i>                  | Crassulaceae | Variety of <i>Sedum spurium</i> M.Bieb.      |
| <i>Sedum spurium</i> M.Bieb.                        | Crassulaceae | Accepted                                     |
| <i>Sedum spurium purpureum</i>                      | Crassulaceae | Variety of <i>Sedum spurium</i> M.Bieb.      |

|                                                                    |              |                                                       |
|--------------------------------------------------------------------|--------------|-------------------------------------------------------|
| <i>Sedum stahlii</i> Solms                                         | Crassulaceae | Accepted                                              |
| <i>Sedum stefco</i> Stef.                                          | Crassulaceae | Accepted                                              |
| <i>Sedum stellatum</i> L.                                          | Crassulaceae | Accepted                                              |
| <i>Sedum stenopetalum</i> Pursh.                                   | Crassulaceae | Accepted                                              |
| <i>Sedum stoloniferum</i> S.G.Gmel.                                | Crassulaceae | Accepted                                              |
| <i>Sedum surculosum</i> var. <i>luteum</i>                         | Crassulaceae | Synonym of <i>Monanthes atlantica</i> J. Ball.        |
| <i>Sedum takesimense</i> “Gold Carpet”                             | Crassulaceae | Unresolved                                            |
| <i>Sedum telephium</i> ‘Matrona’                                   | Crassulaceae | Variety of <i>Sedum telephium</i> L.                  |
| <i>Sedum telephium</i> L.                                          | Crassulaceae | Accepted                                              |
| <i>Sedum telephium</i> subsp. <i>fabaria</i> (W.D.J.Koch) Kirschl. | Crassulaceae | Synonym of <i>Sedum telephium</i> L.                  |
| <i>Sedum telephium</i> var. <i>maximum</i>                         | Crassulaceae | Synonym of <i>Sedum maximum</i> (L.) Suter.           |
| <i>Sedum ternatum</i> Michx.                                       | Crassulaceae | Accepted                                              |
| <i>Sedum tetractinum</i> ‘Vera Jameson’                            | Crassulaceae | Variety of <i>Sedum tetractinum</i> Fröd.             |
| <i>Sedum tetractinum</i> Fröd.                                     | Crassulaceae | Accepted                                              |
| <i>Sedum tomentosum</i>                                            | Crassulaceae | No results                                            |
| <i>Sedum urvillei</i> DC.                                          | Crassulaceae | Accepted                                              |
| <i>Sedum variegatum</i>                                            | Crassulaceae | Synonym of <i>Dudleya variegata</i> (S.Watson) Moran. |
| <i>Sedum x luteoviride</i>                                         | Crassulaceae | Unresolved                                            |
| <i>Sedum x rubrotinctum</i>                                        | Crassulaceae | No results                                            |
| <i>Selliera radicans</i> Cav.                                      | Goodeniaceae | Accepted                                              |
| <i>Sempervivum</i> ‘Reinhard’                                      | Crassulaceae | No results                                            |
| <i>Sempervivum</i> ‘Royal Ruby                                     | Crassulaceae | No results                                            |
| <i>Sempervivum arachnoideum</i> L.                                 | Crassulaceae | Accepted                                              |
| <i>Sempervivum calcareum</i> Jord.                                 | Crassulaceae | Accepted                                              |
| <i>Sempervivum globiferum</i> L.                                   | Crassulaceae | Accepted                                              |
| <i>Sempervivum montanum</i> L.                                     | Crassulaceae | Accepted                                              |

|                                                   |              |                                                                |
|---------------------------------------------------|--------------|----------------------------------------------------------------|
| <i>Sempervivum tectorum</i> L.                    | Crassulaceae | Accepted                                                       |
| <i>Senecio brasiliensis</i> (Spreng.) Less.       | Compositae   | Accepted                                                       |
| <i>Senecio ceratophylloides</i> Griseb.           | Compositae   | Accepted                                                       |
| <i>Senecio cineraria</i> DC.                      | Compositae   | Synonym of <i>Jacobaea maritima</i> (L.) Pelser & Meijden      |
| <i>Senecio crassissimus</i>                       | Compositae   | Unresolved                                                     |
| <i>Senecio inaequidens</i> DC.                    | Compositae   | Accepted                                                       |
| <i>Senecio integrifolius</i> Hook.                | Compositae   | Accepted                                                       |
| <i>Senecio jacobaea</i>                           | Compositae   | Synonym of <i>Jacobaea vulgaris</i> Gaertn.                    |
| <i>Senecio mandraliscae</i> (Tineo)<br>H.Jacobsen | Compositae   | Accepted                                                       |
| <i>Senecio pauperculus</i>                        | Compositae   | Synonym of <i>Packera paupercula</i> (Michx.) Á.Löve & D.Löve. |
| <i>Senecio viscosus</i> L.                        | Compositae   | Accepted                                                       |
| <i>Senecio vulgaris</i> L.                        | Compositae   | Accepted                                                       |
| <i>Senna artemisioides</i> ssp. <i>X coriacea</i> | Leguminosae  | No results                                                     |
| <i>Serissa foetida</i>                            | Rubiaceae    | Synonym of <i>Serissa japonica</i> (Thunb.) Thunb.             |
| <i>Serissa japonica</i> (Thunb.) Thunb.           | Rubiaceae    | Accepted                                                       |
| <i>Sesleria caerulea</i> (L.) Ard.                | Poaceae      | Accepted                                                       |
| <i>Sesuvium portulacastrum</i> (L.) L.            | Aizoaceae    | Accepted                                                       |
| <i>Sesuvium verrucosum</i> Raf.                   | Aizoaceae    | Accepted                                                       |
| <i>Setaria faberi</i> R.A.W.Herrm.                | Poaceae      | Accepted                                                       |
| <i>Setaria glauca</i>                             | Poaceae      | Synonym of <i>Pennisetum glaucum</i> (L.) R.Br.                |
| <i>Setaria parviflora</i> (Poir.)<br>M.Kerguelen. | Poaceae      | Accepted                                                       |
| <i>Setaria verticillata</i> (L.) P.Beauv.         | Poaceae      | Accepted                                                       |
| <i>Setaria viridis</i> (L.) P.Beauv.              | Poaceae      | Accepted                                                       |

|                                                  |                 |                                                                                      |
|--------------------------------------------------|-----------------|--------------------------------------------------------------------------------------|
| <i>Setcreasea pallida</i>                        | Commelinaceae   | Synonym of <i>Tradescantia pallida</i> (Rose) D.R.Hunt.                              |
| <i>Setcreasea purpurea</i>                       | Commelinaceae   | Synonym of <i>Tradescantia pallida</i> (Rose) D.R.Hunt.                              |
| <i>Shepherdia canadensis</i> (L.) Nutt.          | Elaeagnaceae    | Accepted                                                                             |
| <i>Sibbaldia tridentata</i> (Sol.) Paule & Soj k | Rosaceae        | Unresolved                                                                           |
| <i>Sibbaldiopsis tridentata</i> (Sol.) Rydb.     | Rosaceae        | Accepted                                                                             |
| <i>Sida acuta</i> Burm.f.                        | Malvaceae       | Accepted                                                                             |
| <i>Sida dictyocarpa</i> Griseb. ex K.Schum.      | Malvaceae       | Synonym of <i>Sida glabra</i> Mill.                                                  |
| <i>Sida rhombifolia</i> L.                       | Malvaceae       | Accepted                                                                             |
| <i>Sida spinosa</i> L.                           | Malvaceae       | Accepted                                                                             |
| <i>Sidalcea malviflora</i> (DC.) A. Gray.        | Malvaceae       | Accepted                                                                             |
| <i>Sideritis athoa</i>                           | Lamiaceae       | Synonym of <i>Sideritis perfoliata</i> subsp. <i>athoa</i> (Papan. & Kokkini) Baden. |
| <i>Sideritis hyssopifolia</i> L.                 | Lamiaceae       | Accepted                                                                             |
| <i>Sideritis syriaca</i> L.                      | Lamiaceae       | Accepted                                                                             |
| <i>Silene aegyptiaca</i> (L.) L.f.               | Caryophyllaceae | Accepted                                                                             |
| <i>Silene alba</i>                               | Caryophyllaceae | Synonym of <i>Silene latifolia</i> subsp. <i>alba</i> (Mill.) Greuter & Burdet.      |
| <i>Silene conica</i> L.                          | Caryophyllaceae | Accepted                                                                             |
| <i>Silene dioica</i> (L.) Clairv.                | Caryophyllaceae | Accepted                                                                             |
| <i>Silene gallica</i> L.                         | Caryophyllaceae | Accepted                                                                             |
| <i>Silene latifolia</i> Poir.                    | Caryophyllaceae | Accepted                                                                             |
| <i>Silene otites</i> (L.) Wibel.                 | Caryophyllaceae | Accepted                                                                             |
| <i>Silene schafta</i>                            | Caryophyllaceae | Unresolved                                                                           |
| <i>Silene secundiflora</i> Oth.                  | Caryophyllaceae | Accepted                                                                             |
| <i>Silene uniflora</i> Roth.                     | Caryophyllaceae | Accepted                                                                             |
| <i>Silene viscaria</i> (L.) Jess.                | Caryophyllaceae | Accepted                                                                             |

|                                                      |                 |                                                 |
|------------------------------------------------------|-----------------|-------------------------------------------------|
| <i>Silene vulgaris</i> (Moench) Garcke.              | Caryophyllaceae | Accepted                                        |
| <i>Silphium integrifolium</i> Michx.                 | Compositae      | Accepted                                        |
| <i>Silphium laciniatum</i> L.                        | Compositae      | Accepted                                        |
| <i>Sinapis alba</i> L.                               | Brassicaceae    | Accepted                                        |
| <i>Sisyrinchium albidum</i> Raf.                     | Iridaceae       | Accepted                                        |
| <i>Sisyrinchium angustifolium</i> Mill.              | Iridaceae       | Accepted                                        |
| <i>Sisyrinchium bellum</i> S.Watson.                 | Iridaceae       | Accepted                                        |
| <i>Sisyrinchium bogotense</i> Kunth                  | Iridaceae       | Synonym of <i>Sisyrinchium tinctorium</i> Kunth |
| <i>Sisyrinchium californicum</i> (Ker Gawl.) Dryand. | Iridaceae       | Accepted                                        |
| <i>Sisyrinchium campestre</i> E.P.Bicknell.          | Iridaceae       | Accepted                                        |
| <i>Sisyrinchium idahoense</i> E.P.Bicknell.          | Iridaceae       | Accepted                                        |
| <i>Sisyrinchium mucronatum</i> Michx.                | Iridaceae       | Accepted                                        |
| <i>Sisyrinchium striatum</i> Sm.                     | Iridaceae       | Accepted                                        |
| <i>Smallanthus uvedalia</i> (L.) Mack. ex Mack.      | Compositae      | Accepted                                        |
| <i>Solanum americanum</i> Mill.                      | Solanaceae      | Accepted                                        |
| <i>Solanum lycopersicum</i> L.                       | Solanaceae      | Accepted                                        |
| <i>Solanum melongena</i> L.                          | Solanaceae      | Accepted                                        |
| <i>Solanum nigrum</i>                                | Solanaceae      | Synonym of <i>Solanum americanum</i> Mill.      |
| <i>Solanum ptychanthum</i> Dunal                     | Solanaceae      | Accepted                                        |
| <i>Solanum tuberosum</i> L.                          | Solanaceae      | Accepted                                        |
| <i>Solidago bicolor</i> L.                           | Compositae      | Accepted                                        |
| <i>Solidago canadensis</i> L.                        | Compositae      | Accepted                                        |
| <i>Solidago flexicaulis</i> L.                       | Compositae      | Accepted                                        |
| <i>Solidago gigantea</i> Aiton                       | Compositae      | Accepted                                        |
| <i>Solidago juncea</i> Aiton                         | Compositae      | Accepted                                        |
| <i>Solidago memorialis</i>                           | Compositae      | Unresolved                                      |
| <i>Solidago nemoralis</i> Aiton.                     | Compositae      | Accepted                                        |

|                                                                  |                 |                                                            |
|------------------------------------------------------------------|-----------------|------------------------------------------------------------|
| <i>Solidago odora</i> Aiton.                                     | Compositae      | Accepted                                                   |
| <i>Solidago praecox</i>                                          | Compositae      | Unresolved                                                 |
| <i>Solidago ptarmicoides</i> (Torr. & A.Gray) B.Boivin.          | Compositae      | Accepted                                                   |
| <i>Solidago puberula</i> Nutt.                                   | Compositae      | Accepted                                                   |
| <i>Solidago rigida</i> L.                                        | Compositae      | Accepted                                                   |
| <i>Solidago sempervirens</i> Michx.                              | Compositae      | Accepted                                                   |
| <i>Solidago speciosa</i> A.Gray.                                 | Compositae      | Accepted                                                   |
| <i>Solidago velutina</i> ssp. <i>californica</i> (Nutt.) Semple. | Compositae      | Accepted                                                   |
| <i>Soliva anthemifolia</i> (Juss.) Sweet.                        | Compositae      | Accepted                                                   |
| <i>Sonchus arvensis</i> L.                                       | Compositae      | Accepted                                                   |
| <i>Sonchus asper</i> (L.) Hill                                   | Compositae      | Accepted                                                   |
| <i>Sonchus oleraceus</i> (L.) L.                                 | Compositae      | Accepted                                                   |
| <i>Sonchus tenerrimus</i> L.                                     | Compositae      | Accepted                                                   |
| <i>Sorghastrum nutans</i> (L.) Nash.                             | Poaceae         | Accepted                                                   |
| <i>Sorghum halepense</i> (L.) Pers.                              | Poaceae         | Accepted                                                   |
| <i>Sparaxis tricolor</i> (Schneev.) Ker Gawl.                    | Iridaceae       | Accepted                                                   |
| <i>Spartium junceum</i> L.                                       | Leguminosae     | Accepted                                                   |
| <i>Spergularia diandra</i> (Guss.) Heldr.                        | Caryophyllaceae | Accepted                                                   |
| <i>Spergularia rubra</i> (L.) J.Presl & C.Presl.                 | Caryophyllaceae | Accepted                                                   |
| <i>Spermacoce stricta</i>                                        | Rubiaceae       | Synonym of <i>Oldenlandia tenelliflora</i> (Blume) Kuntze. |
| <i>Spermacoce verticillata</i> L.                                | Rubiaceae       | Accepted                                                   |
| <i>Sphaeralcea australis</i> Speg.                               | Malvaceae       | Accepted                                                   |
| <i>Sphagneticola trilobata</i> (L.) Pruski.                      | Compositae      | Accepted                                                   |
| <i>Spigelia anthelmia</i> L.                                     | Loganiaceae     | Accepted                                                   |
| <i>Spinacia oleracea</i> L.                                      | Amaranthaceae   | Accepted                                                   |
| <i>Spiranthes hongkongensis</i> S.Y.Hu & Barretto.               | Orchidaceae     | Accepted                                                   |

|                                                    |                 |                                                               |
|----------------------------------------------------|-----------------|---------------------------------------------------------------|
| <i>Spiranthes vernalis</i> Engelm. & A.Gray.       | Orchidaceae     | Accepted                                                      |
| <i>Sporobolus airoides</i> (Torr.) Torr.           | Poaceae         | Accepted                                                      |
| <i>Sporobolus cryptandrus</i> (Torr.) A.Gray.      | Poaceae         | Accepted                                                      |
| <i>Sporobolus fertilis</i> (Steud.) Clayton.       | Poaceae         | Accepted                                                      |
| <i>Sporobolus heterolepis</i> (Gray) A.Gray.       | Poaceae         | Accepted                                                      |
| <i>Sporobolus neglectus</i> Nash.                  | Poaceae         | Accepted                                                      |
| <i>Sporobolus pungens</i> (Schreb.) Kunth.         | Poaceae         | Accepted                                                      |
| <i>Sporobolus vaginiflorus</i> (Gray) Alph.Wood    | Poaceae         | Accepted                                                      |
| <i>Stachys bullata</i> Benth.                      | Lamiaceae       | Accepted                                                      |
| <i>Stachys byzantina</i> ‘Silver Carpet’           | Lamiaceae       | Variety of <i>Stachys byzantina</i> K.Koch.                   |
| <i>Stachys byzantina</i> K.Koch.                   | Lamiaceae       | Accepted                                                      |
| <i>Stachytarpheta jamaicensis</i> (L.) Vahl        | Verbenaceae     | Accepted                                                      |
| <i>Stapelia grandiflora</i> Masson                 | Apocynaceae     | Accepted                                                      |
| <i>Stellaria media</i> (L.) Vill.                  | Caryophyllaceae | Accepted                                                      |
| <i>Stellaria graminea</i> L.                       | Caryophyllaceae | Accepted                                                      |
| <i>Stemodia lanata</i> Ruiz & Pav.                 | Plantaginaceae  | Accepted                                                      |
| <i>Stenotaphrum secundatum</i> (Walter) Kuntze     | Poaceae         | Accepted                                                      |
| <i>Sternbergia lutea</i> (L.) Ker Gawl. ex Spreng. | Amaryllidaceae  | Accepted                                                      |
| <i>Stipa bromoides</i> (L.) Dörf.                  | Poaceae         | Accepted                                                      |
| <i>Stipa capensis</i> Thunb.                       | Poaceae         | Accepted                                                      |
| <i>Stipa comata</i> Trin. & Rupr.                  | Poaceae         | Accepted                                                      |
| <i>Stipa neesiana</i> Trin. & Rupr.                | Poaceae         | Synonym of <i>Nassella neesiana</i> (Trin. & Rupr.) Barkworth |



|                                                                  |                  |                                                          |
|------------------------------------------------------------------|------------------|----------------------------------------------------------|
| <i>Stipa pulchra</i>                                             | Poaceae          | Synonym of <i>Nassella pulchra</i> (Hitchc.) Barkworth.  |
| <i>Stipa purpurea</i> Griseb.                                    | Poaceae          | Accepted                                                 |
| <i>Stipa tenuissima</i>                                          | Poaceae          | Synonym of <i>Nassella tenuissima</i> (Trin.) Barkworth. |
| <i>Strelitzia reginae</i> Banks                                  | Strelitziaceae   | Accepted                                                 |
| <i>Streptanthus cordatus</i> Nutt.                               | Brassicaceae     | Accepted                                                 |
| <i>Struchium sparganophorum</i> (L.) Kuntze.                     | Compositae       | Accepted                                                 |
| <i>Stylidium graminifolium</i>                                   | Stylidiaceae     | Unresolved                                               |
| <i>Stylosanthes biflora</i> (L.) Britton & al.                   | Leguminosae      | Accepted                                                 |
| <i>Stypandra glauca</i> R.Br.                                    | Xanthorrhoeaceae | Accepted                                                 |
| <i>Suaeda vera</i> Forssk. ex J.F.Gmel.                          | Amaranthaceae    | Accepted                                                 |
| <i>Succisa pratensis</i> Moench.                                 | Caprifoliaceae   | Accepted                                                 |
| <i>Symphoricarpos albus</i> (L.) S.F.Blake.                      | Caprifoliaceae   | Accepted                                                 |
| <i>Symphoricarpos albus</i> var. <i>laevigatus</i> 'Tilden Park' | Caprifoliaceae   | Accepted                                                 |
| <i>Symphyotrichum albus</i>                                      | Compositae       | No results                                               |
| <i>Symphyotrichum azureus</i>                                    | Compositae       | No results                                               |
| <i>Symphyotrichum chilense</i> (Nees) G.L.Nesom.                 | Compositae       | Accepted                                                 |
| <i>Symphyotrichum depauperatum</i> (Fernald) G.L.Nesom.          | Compositae       | Accepted                                                 |
| <i>Symphyotrichum ericoides</i> (L.) G.L.Nesom.                  | Compositae       | Accepted                                                 |
| <i>Symphyotrichum laeve</i> (L.) Á.Löve & D.Löve                 | Compositae       | Accepted                                                 |

|                                                              |            |                                                                 |
|--------------------------------------------------------------|------------|-----------------------------------------------------------------|
| <i>Symphyotrichum lateriflorum</i> (L.)<br>Á.Löve & D.Löve.  | Compositae | Accepted                                                        |
| <i>Symphyotrichum macrophyllum</i>                           | Compositae | No results                                                      |
| <i>Symphyotrichum novae-angliae</i> (L.)<br>G.L.Nesom.       | Compositae | Accepted                                                        |
| <i>Symphyotrichum novi-belgii</i> (L.)<br>G.L.Nesom.         | Compositae | Accepted                                                        |
| <i>Symphyotrichum oblongifolium</i> (Nutt.) G.L.Nesom.       | Compositae | Accepted                                                        |
| <i>Symphyotrichum oolentangiense</i><br>(Riddell) G.L.Nesom. | Compositae | Accepted                                                        |
| <i>Symphyotrichum pilosum</i> (Willd.)<br>G.L.Nesom.         | Compositae | Accepted                                                        |
| <i>Symphyotrichum sericeum</i> (Vent.)<br>G.L.Nesom.         | Compositae | Accepted                                                        |
| <i>Symphyotrichum subspicatum</i> (Nees)<br>G.L.Nesom.       | Compositae | Accepted                                                        |
| <i>Synelcosciadium carmeli</i> Boiss.                        | Apiaceae   | Accepted                                                        |
| <i>Syringa vulgaris</i> L.                                   | Oleaceae   | Accepted                                                        |
| <i>Syzygium smithii</i> (Poir.) Nied.                        | Myrtaceae  | Accepted                                                        |
| <i>Tagetes erecta</i> L.                                     | Compositae | Accepted                                                        |
| <i>Tagetes lemmonii</i> A.Gray.                              | Compositae | Accepted                                                        |
| <i>Tagetes minuta</i> L.                                     | Compositae | Accepted                                                        |
| <i>Talinum calycinum aureum</i>                              | Talinaceae | No results                                                      |
| <i>Talinum calycinum</i> Engelm.                             | Talinaceae | Accepted                                                        |
| <i>Talinum paniculatum</i> (Jacq.) Gaertn.                   | Talinaceae | Accepted                                                        |
| <i>Talinum parviflorum</i>                                   | Montiaceae | Synonym of<br><i>Phemeranthus parviflorus</i><br>(Nutt.) Kiger. |
| <i>Talinum rugospermum</i>                                   | Montiaceae | Synonym of<br><i>Phemeranthus rugospermus</i> (Holz.)<br>Kiger. |

|                                                     |               |                                                                                     |
|-----------------------------------------------------|---------------|-------------------------------------------------------------------------------------|
| <i>Tanacetum corymbosum</i> (L.)<br>Sch.Bip.        | Compositae    | Accepted                                                                            |
| <i>Tanacetum vulgare</i> L.                         | Compositae    | Accepted                                                                            |
| <i>Taraxacum buttléri</i> Soest.                    | Compositae    | Accepted                                                                            |
| <i>Taraxacum campylodes</i><br>G.E.Haglund          | Compositae    | Accepted                                                                            |
| <i>Taraxacum officinale</i>                         | Compositae    | Synonym of <i>Taraxacum campylodes</i> G.E.Haglund.                                 |
| <i>Taraxacum section ruderalia</i>                  | Compositae    | No results                                                                          |
| <i>Tetragonia implexicoma</i> (Miq.)<br>Hook. f.    | Aizoaceae     | Accepted                                                                            |
| <i>Tetragonia tetragonioides</i> (Pall.)<br>Kuntze. | Aizoaceae     | Accepted                                                                            |
| <i>Teucrium aroanium</i> Orph. ex Boiss.            | Lamiaceae     | Accepted                                                                            |
| <i>Teucrium aureum</i> Schreb.                      | Lamiaceae     | Accepted                                                                            |
| <i>Teucrium brevifolium</i> Schreb.                 | Lamiaceae     | Accepted                                                                            |
| <i>Teucrium canadense</i> L.                        | Lamiaceae     | Accepted                                                                            |
| <i>Teucrium capitatum</i> L.                        | Lamiaceae     | Accepted                                                                            |
| <i>Teucrium chamaedrys</i> L.                       | Lamiaceae     | Accepted                                                                            |
| <i>Teucrium fruticans</i> L.                        | Lamiaceae     | Accepted                                                                            |
| <i>Teucrium graphaloides</i> L'Hér.                 | Lamiaceae     | Accepted                                                                            |
| <i>Teucrium montanum</i> L.                         | Lamiaceae     | Accepted                                                                            |
| <i>Teucrium scorodonia</i> L.                       | Lamiaceae     | Accepted                                                                            |
| <i>Thalia dealbata</i> Fraser.                      | Marantaceae   | Accepted                                                                            |
| <i>Thalictrum dioicum</i> L.                        | Ranunculaceae | Accepted                                                                            |
| <i>Thalictrum kiusianum</i> Nakai                   | Ranunculaceae | Unresolved                                                                          |
| <i>Thelesperma ambiguum</i>                         | Compositae    | Synonym of <i>Thelesperma megapotamicum</i> var. <i>ambiguum</i> (A.Gray) Shinnars. |
| <i>Thelesperma filifolium</i> (Hook.)<br>A.Gray.    | Compositae    | Accepted                                                                            |

|                                                      |                      |                                                                                      |
|------------------------------------------------------|----------------------|--------------------------------------------------------------------------------------|
| <i>Thelionema grande</i> (C.T.White)<br>R.J.F.Hend.  | Xanthorrhoeacea<br>e | Accepted                                                                             |
| <i>Themeda triandra</i> Forssk.                      | Poaceae              | Accepted                                                                             |
| <i>Thermopsis rhombifolia</i> (Pursh)<br>Richardson. | Leguminosae          | Accepted                                                                             |
| <i>Thryptomene baeckeacea</i> F.Muell.               | Myrtaceae            | Accepted                                                                             |
| <i>Thymbra capitata</i> (L.) Cav.                    | Lamiaceae            | Accepted                                                                             |
| <i>Thymelaea passerina</i> (L.) Coss. &<br>Germ.     | Thymelaeaceae        | Accepted                                                                             |
| <i>Thymus argenteus</i>                              | Lamiaceae            | No results                                                                           |
| <i>Thymus caespititius</i> Brot.                     | Lamiaceae            | Accepted                                                                             |
| <i>Thymus</i> × <i>citriodorus</i> (Pers.) Schreb.   | Lamiaceae            | Accepted                                                                             |
| <i>Thymus mongolicus</i> (Ronniger)<br>Ronniger.     | Lamiaceae            | Accepted                                                                             |
| <i>Thymus neiceffi</i>                               | Lamiaceae            | Synonym of <i>Thymus leucotrichus</i> subsp. <i>neiceffii</i> (Degen & Urum.) Jalas. |
| <i>Thymus longicaulis</i> C.Presl                    | Lamiaceae            | Accepted                                                                             |
| <i>Thymus praecox</i> Opiz.                          | Lamiaceae            | Accepted                                                                             |
| <i>Thymus pseudolanuginosus</i>                      | Lamiaceae            | Synonym of <i>Thymus praecox</i> subsp. <i>britannicus</i> (Ronniger) Holub.         |
| <i>Thymus pulegioides</i> L.                         | Lamiaceae            | Accepted                                                                             |
| <i>Thymus serpyllum</i>                              | Lamiaceae            | Synonym of <i>Thymus mongolicus</i> (Ronniger) Ronniger.                             |
| <i>Thymus serpyllum</i> L.                           | Lamiaceae            | Accepted                                                                             |
| <i>Thymus vulgaris</i> L.                            | Lamiaceae            | Accepted                                                                             |
| <i>Tidestromia oblongifolia</i>                      | Amaranthaceae        | Synonym of <i>Tidestromia suffruticosa</i> var. <i>oblongifolia</i> (S. Watson)      |

|                                                      |                  |                                   |
|------------------------------------------------------|------------------|-----------------------------------|
|                                                      |                  | Sánchez-del Pino & Flores Olvera. |
| <i>Tillandsia recurvifolia</i> Hook.                 | Bromeliaceae     | Accepted                          |
| <i>Tillandsia usneoides</i> (L.) L.                  | Bromeliaceae     | Accepted                          |
| <i>Tilia cordata</i> Mill.                           | Malvaceae        | Accepted                          |
| <i>Tordylium carmeli</i>                             | Apiaceae         | Unresolved                        |
| <i>Torenia fournieri</i> Linden ex E. Fourn.         | Linderniaceae    | Accepted                          |
| <i>Torilis japônica</i> (Houtt.) DC.                 | Apiaceae         | Accepted                          |
| <i>Torilis nodosa</i> (L.) Gaertn.                   | Apiaceae         | Accepted                          |
| <i>Townsendia eximia</i> A.Gray.                     | Compositae       | Accepted                          |
| <i>Trachelospermum jasminoides</i> (Lindl.) Lem.     | Apocynaceae      | Accepted                          |
| <i>Tradescantia bracteata</i> Small ex Britton.      | Commelinaceae    | Accepted                          |
| <i>Tradescantia occidentalis</i> (Britton) Smyth     | Commelinaceae    | Accepted                          |
| <i>Tradescantia ohiensis</i> Raf.                    | Commelinaceae    | Accepted                          |
| <i>Tradescantia pallida</i> (Rose) D.R.Hunt.         | Commelinaceae    | Accepted                          |
| <i>Tradescantia tharpaii</i> E.S.Anderson & Woodson. | Commelinaceae    | Accepted                          |
| <i>Tradescantia zebrina</i> Bosse.                   | Commelinaceae    | Accepted                          |
| <i>Tragopogon pratensis</i> L.                       | Compositae       | Accepted                          |
| <i>Trichloris crinita</i> (Lag.) Parodi              | Poaceae          | Accepted                          |
| <i>Trichostema brachiatum</i> L.                     | Lamiaceae        | Accepted                          |
| <i>Tricoryne elatior</i> R.Br.                       | Xanthorrhoeaceae | Accepted                          |
| <i>Tridax procumbens</i> (L.) L.                     | Compositae       | Accepted                          |
| <i>Tridens flavus</i> (L.) Hitchc.                   | Poaceae          | Accepted                          |
| <i>Trifolium alpinum</i> L.                          | Leguminosae      | Accepted                          |
| <i>Trifolium angustifolium</i> L.                    | Leguminosae      | Accepted                          |
| <i>Trifolium arvense</i> L.                          | Leguminosae      | Accepted                          |

|                                                                     |                |                                                                          |
|---------------------------------------------------------------------|----------------|--------------------------------------------------------------------------|
| <i>Trifolium campestre</i> Schreb.                                  | Leguminosae    | Accepted                                                                 |
| <i>Trifolium dubium</i> Sibth.                                      | Leguminosae    | Accepted                                                                 |
| <i>Trifolium fragiferum</i> L.                                      | Leguminosae    | Accepted                                                                 |
| <i>Trifolium hybridum</i> L.                                        | Leguminosae    | Accepted                                                                 |
| <i>Trifolium incarnatum</i> L.                                      | Leguminosae    | Accepted                                                                 |
| <i>Trifolium medium</i> L.                                          | Leguminosae    | Accepted                                                                 |
| <i>Trifolium palaestinum</i> Boiss.                                 | Leguminosae    | Accepted                                                                 |
| <i>Trifolium pratense</i> L.                                        | Leguminosae    | Accepted                                                                 |
| <i>Trifolium purpureum</i> Loisel.                                  | Leguminosae    | Accepted                                                                 |
| <i>Trifolium repens</i> L.                                          | Leguminosae    | Accepted                                                                 |
| <i>Trifolium stellatum</i> L.                                       | Leguminosae    | Accepted                                                                 |
| <i>Trinia glauca</i> (L.) Dumort.                                   | Apiaceae       | Accepted                                                                 |
| <i>Triodanis perfoliata</i> (L.) Nieuwl.                            | Campanulaceae  | Accepted                                                                 |
| <i>Tripleurospermum inodorum</i> (L.)<br>Sch.Bip.                   | Compositae     | Accepted                                                                 |
| <i>Tripleurospermum maritimum</i> (L.)<br>W.D.J.Koch.               | Compositae     | Accepted                                                                 |
| <i>Trisetum flavescens</i> (L.) P.Beauv.                            | Poaceae        | Accepted                                                                 |
| <i>Tristellateia australasiae</i> A. Rich.                          | Malpighiaceae  | Accepted                                                                 |
| <i>Triticum aestivum</i> L.                                         | Poaceae        | Accepted                                                                 |
| <i>Triticum dicoccoides</i> (Körn. ex<br>Asch. & Graebn.) Schweinf. | Poaceae        | Accepted                                                                 |
| <i>Tuberaria guttata</i> (L.) Fourr.                                | Cistaceae      | Accepted                                                                 |
| <i>Tulbaghia violacea</i> Harv.                                     | Amaryllidaceae | Accepted                                                                 |
| <i>Tulipa bakeri</i>                                                | Liliaceae      | Synonym of <i>Tulipa saxatilis</i> subsp. <i>bakeri</i> (A.D.Hall) Zonn. |
| <i>Tulipa clusiana</i> var. <i>chrysantha</i>                       | Liliaceae      | Synonym of <i>Tulipa clusiana</i> DC.                                    |
| <i>Tulipa hageri</i> 'Splendens'                                    | Liliaceae      | Variety of <i>Tulipa hageri</i> Heldr.                                   |
| <i>Tulipa humilis</i> Herb.                                         | Liliaceae      | Accepted                                                                 |
| <i>Tulipa kolpakowskiana</i> Regel.                                 | Liliaceae      | Accepted                                                                 |

|                                           |                  |                                                                |
|-------------------------------------------|------------------|----------------------------------------------------------------|
| <i>Tulipa linifolia</i> Regel.            | Liliaceae        | Accepted                                                       |
| <i>Tulipa praestans</i> ‘Fusilier’        | Liliaceae        | Variety of<br><i>Tulipa praestans</i> H.B.Ma<br>y              |
| <i>Tulipa saxatilis</i> Sieber ex Spreng. | Liliaceae        | Accepted                                                       |
| <i>Tulipa tarda</i> Stapf.                | Liliaceae        | Accepted                                                       |
| <i>Tulipa turkestanica</i> (Regel) Regel. | Liliaceae        | Accepted                                                       |
| <i>Tulipa urumiensis</i>                  | Liliaceae        | Synonym of <i>Tulipa tarda</i><br>Stapf                        |
| <i>Tussilago farfara</i> L.               | Compositae       | Accepted                                                       |
| <i>Typha angustifolia</i> L.              | Typhaceae        | Accepted                                                       |
| <i>Ulmus americana</i> L.                 | Ulmaceae         | Accepted                                                       |
| <i>Ulmus glabra</i> Huds.                 | Ulmaceae         | Accepted                                                       |
| <i>Ulmus minor</i> Mill.                  | Ulmaceae         | Accepted                                                       |
| <i>Ulmus parvifolia</i> Jacq.             | Ulmaceae         | Accepted                                                       |
| <i>Ulmus pumila</i> L.                    | Ulmaceae         | Accepted                                                       |
| <i>Uncinia rubra</i> Colenso ex Boott     | Cyperaceae       | Accepted                                                       |
| <i>Urtica dioica</i> L.                   | Urticaceae       | Accepted                                                       |
| <i>Vaccinium angustifolium</i> Aiton.     | Ericaceae        | Accepted                                                       |
| <i>Vaccinium macrocarpon</i> Aiton.       | Ericaceae        | Accepted                                                       |
| <i>Vaccinium vitis-idaea</i> L.           | Ericaceae        | Accepted                                                       |
| <i>Valerianella locusta</i> (L.) Laterr.  | Caprifoliaceae   | Accepted                                                       |
| <i>Vella spinosa</i> Boiss.               | Brassicaceae     | Accepted                                                       |
| <i>Velleia paradoxa</i> R.Br.             | Goodeniaceae     | Unresolved                                                     |
| <i>Vemonia glauca</i> (L.) Willd.         | Compositae       | Accepted                                                       |
| <i>Verbascum blattaria</i> L.             | Scrophulariaceae | Accepted                                                       |
| <i>Verbascum lychnitis</i> L.             | Scrophulariaceae | Accepted                                                       |
| <i>Verbascum nigrum</i> L.                | Scrophulariaceae | Accepted                                                       |
| <i>Verbascum phoeniceum</i> L.            | Scrophulariaceae | Accepted                                                       |
| <i>Verbascum thapsus</i> L.               | Scrophulariaceae | Accepted                                                       |
| <i>Verbena</i> × <i>hybrida</i>           | Verbenaceae      | Unresolved                                                     |
| <i>Verbena canadensis</i>                 | Verbenaceae      | Synonym of <i>Glandularia</i><br><i>canadensis</i> (L.) Small. |

|                                             |                |                                                                                       |
|---------------------------------------------|----------------|---------------------------------------------------------------------------------------|
| <i>Verbena hastata</i> L.                   | Verbenaceae    | Accepted                                                                              |
| <i>Verbena hybrida</i> Groenl. & Rumphel    | Verbenaceae    | Accepted                                                                              |
| <i>Verbena simplex</i> Lehm.                | Verbenaceae    | Accepted                                                                              |
| <i>Verbena stricta</i> Vent.                | Verbenaceae    | Accepted                                                                              |
| <i>Vernonia cinerea</i> var. <i>cinerea</i> | Compositae     | Unresolved                                                                            |
| <i>Veronica arvensis</i> L.                 | Plantaginaceae | Accepted                                                                              |
| <i>Veronica chamaedrys</i> L.               | Plantaginaceae | Accepted                                                                              |
| <i>Veronica gracilis</i> R.Br.              | Plantaginaceae | Unresolved                                                                            |
| <i>Veronica liwanensis</i>                  | Plantaginaceae | Unresolved                                                                            |
| <i>Veronica longifolia</i> L.               | Plantaginaceae | Accepted                                                                              |
| <i>Veronica officinalis</i> L.              | Plantaginaceae | Accepted                                                                              |
| <i>Veronica pectinata</i> L.                | Plantaginaceae | Accepted                                                                              |
| <i>Veronica perfoliata</i> R.Br.            | Plantaginaceae | Accepted                                                                              |
| <i>Veronica persica</i> Poir.               | Plantaginaceae | Accepted                                                                              |
| <i>Veronica prostrata</i> L.                | Plantaginaceae | Accepted                                                                              |
| <i>Veronica spicata</i> L.                  | Plantaginaceae | Accepted                                                                              |
| <i>Veronica thymoides</i>                   | Plantaginaceae | Unresolved                                                                            |
| <i>Veronica whitleyi</i>                    | Plantaginaceae | No results                                                                            |
| <i>Veronicastrum virginicum</i> (L.) Farw.  | Plantaginaceae | Accepted                                                                              |
| <i>Verticordia monadelphica</i> Turcz.      | Myrtaceae      | Accepted                                                                              |
| <i>Vicia cracca</i> L.                      | Leguminosae    | Accepted                                                                              |
| <i>Vicia faba</i> L.                        | Leguminosae    | Accepted                                                                              |
| <i>Vicia sativa</i> L.                      | Leguminosae    | Accepted                                                                              |
| <i>Vicia sepium</i> L.                      | Leguminosae    | Accepted                                                                              |
| <i>Vicia hirsuta</i> (L.) Gray              | Leguminosae    | Accepted                                                                              |
| <i>Vinca major</i> L.                       | Apocynaceae    | Accepted                                                                              |
| <i>Vinca minor</i> L.                       | Apocynaceae    | Accepted                                                                              |
| <i>Viola arvensis</i> Murray.               | Violaceae      | Accepted                                                                              |
| <i>Viola canina</i> L.                      | Violaceae      | Accepted                                                                              |
| <i>Viola egglesonii</i>                     | Violaceae      | Synonym of <i>Viola septemloba</i> subsp. <i>egglesonii</i> (Brainerd) L.E. McKinney. |



|                                                |                  |                                                               |
|------------------------------------------------|------------------|---------------------------------------------------------------|
| <i>Viola inconspicua</i> Blume.                | Violaceae        | Accepted                                                      |
| <i>Viola odorata</i> L.                        | Violaceae        | Accepted                                                      |
| <i>Viola pedata</i> L.                         | Violaceae        | Accepted                                                      |
| <i>Viola pedatifida</i> G. Don.                | Violaceae        | Accepted                                                      |
| <i>Viola praemorsa</i> Douglas                 | Violaceae        | Accepted                                                      |
| <i>Viola reichenbachiana</i> Jord. ex Boreau.  | Violaceae        | Accepted                                                      |
| <i>Viola sagittata</i> Aiton.                  | Violaceae        | Accepted                                                      |
| <i>Viola tricolor</i> L.                       | Violaceae        | Accepted                                                      |
| <i>Viola</i> × <i>wittrockiana</i> Gams        | Violaceae        | Unresolved                                                    |
| <i>Vitis vinifera</i> L.                       | Vitaceae         | Accepted                                                      |
| <i>Vittadinia cuneata</i> DC.                  | Compositae       | Accepted                                                      |
| <i>Vittadinia muelleri</i> N.T.Burb.           | Compositae       | Accepted                                                      |
| <i>Vulpia ciliata</i> Dumort.                  | Poaceae          | Accepted                                                      |
| <i>Vulpia geniculata</i> (L.) Link             | Poaceae          | Accepted                                                      |
| <i>Vulpia myuros</i> (L.) C.C.Gmel.            | Poaceae          | Accepted                                                      |
| <i>Wahlenbergia communis</i> Carolin           | Campanulaceae    | Synonym of<br><i>Wahlenbergia capillaris</i><br>(Lodd.) G.Don |
| <i>Wahlenbergia gracilis</i> (G.Forst.) A.DC.  | Campanulaceae    | Accepted                                                      |
| <i>Wahlenbergia luteola</i> P.J.Sm.            | Campanulaceae    | Accepted                                                      |
| <i>Wahlenbergia stricta</i> (R.Br.) Sweet.     | Campanulaceae    | Accepted                                                      |
| <i>Wedelia trilobata</i>                       | Compositae       | Synonym of<br><i>Sphagneticola trilobata</i><br>(L.) Pruski.  |
| <i>Wisteria sinensis</i> (Sims) Sweet.         | Leguminosae      | Accepted                                                      |
| <i>Woodwardia fimbriata</i> Sm.                | Blechnaceae      | Accepted                                                      |
| <i>Xanthorrhoea minor</i> R.Br.                | Xanthorrhoeaceae | Accepted                                                      |
| <i>Xerochrysum bracteatum</i> (Vent.) Tzvelev. | Compositae       | Accepted                                                      |

|                                                       |                |                                                                                  |
|-------------------------------------------------------|----------------|----------------------------------------------------------------------------------|
| <i>Xerochrysum viscosum</i> (Sieber ex DC.) R.J.Bayer | Compositae     | Accepted                                                                         |
| <i>Youngia japonica</i> (L.) DC.                      | Compositae     | Accepted                                                                         |
| <i>Yucca glauca</i> Nutt.                             | Asparagaceae   | Accepted                                                                         |
| <i>Zea mays</i> L.                                    | Poaceae        | Accepted                                                                         |
| <i>Zebrina pendula</i>                                | Commelinaceae  | Synonym of <i>Tradescantia zebrina</i> var. <i>zebrina</i>                       |
| <i>Zenith zoysia grass</i>                            | Poaceae        | No results                                                                       |
| <i>Zephyranthes candida</i> (Lindl.) Herb.            | Amaryllidaceae | Accepted                                                                         |
| <i>Zeuxine strateumatica</i> (L.) Schltr.             | Orchidaceae    | Accepted                                                                         |
| <i>Zingiber officinale</i> Roscoe                     | Zingiberaceae  | Accepted                                                                         |
| <i>Zinnia elegans</i> L.                              | Compositae     | Accepted                                                                         |
| <i>Zinnia peruviana</i> (L.) L.                       | Compositae     | Accepted                                                                         |
| <i>Zizia aurea</i> Koch.                              | Apiaceae       | Accepted                                                                         |
| <i>Ziziphora bungeana</i>                             | Lamiaceae      | Synonym of <i>Ziziphora clinopodioides</i> subsp. <i>bungeana</i> (Juz.) Rech.f. |
| <i>Zoysia japonica</i> Steud.                         | Poaceae        | Accepted                                                                         |
| <i>Zoysia matrella</i> (L.) Merr.                     | Poaceae        | Accepted                                                                         |
| <i>Zoysia matrella</i> 'Zeon'                         | Poaceae        | Variety of <i>Zoysia matrella</i> (L.) Merr.                                     |
| <i>Zoysia tenuifolia</i> Thiele.                      | Poaceae        | Accepted                                                                         |
| <i>Zygophyllum billardierei</i>                       | Zygophyllaceae | Unresolved                                                                       |
