# Supplementary material for: Life at the Top: Extensive Green Roof Plant Species and Their Traits for Urban Use
Source: MDPI journal article supplement (doi:10.3390/plants14050735), 2025-02-27
Supplement: s1 [file s1]

## Supplementary Material S4

Table S4.1. Selected species most frequently found in publications from continental climate as being adequate for green roof use. For those species recognized as being of full-scale consolidated use, corresponding references in Supplementary Material 2 are indicated in the last column. All plant names were checked in IPNI.

| Species name                                  | Frequency | Family         | Full-scale use * |
|-----------------------------------------------|-----------|----------------|------------------|
| <i>Sedum spurium</i> M.Bieb.                  | 45        | Crassulaceae   | 13, 204, 253     |
| <i>Sedum kamtschaticum</i> Fisch.             | 30        | Crassulaceae   | 110, 204         |
| <i>Sedum acre</i> L.                          | 26        | Crassulaceae   | 50, 204, 380     |
| <i>Sedum album</i> L.                         | 24        | Crassulaceae   | 50, 110, 204     |
| <i>Sedum rupestre</i> L.                      | 21        | Crassulaceae   | 110, 253, 304    |
| <i>Sedum sexangulare</i> L.                   | 15        | Crassulaceae   | 110, 204, 253    |
| <i>Allium cernuum</i> Roth                    | 9         | Amaryllidaceae | 356              |
| <i>Solidago bicolor</i> L.                    | 8         | Asteraceae     | 141              |
| <i>Sedum lineare</i> Thunb.                   | 7         | Crassulaceae   | 196, 402, 420    |
| <i>Achillea millefolium</i> L.                | 7         | Asteraceae     | 49, 70, 204      |
| <i>Schizachyrium scoparium</i> (Michx.) Nash  | 6         | Poaceae        | 356, 422         |
| <i>Campanula rotundifolia</i> L.              | 6         | Campanulaceae  | 204, 206, 356    |
| <i>Danthonia spicata</i> (L.) Roem. & Schult. | 6         | Poaceae        | -                |
| <i>Monarda fistulosa</i> L.                   | 6         | Lamiaceae      | -                |
| <i>Sedum roseum</i> (L.) Scop.                | 6         | Crassulaceae   | -                |
| <i>Aquilegia canadenses</i> L.                | 6         | Ranunculaceae  | -                |
| <i>Allium schoenoprasum</i> L.                | 5         | Amaryllidaceae | 174              |
| <i>Trifolium repens</i> L.                    | 5         | Fabaceae       | 50, 204, 326     |
| <i>Sedum hybridum</i> L.                      | 5         | Crassulaceae   | 253              |
| <i>Sedum hispanicum</i> L.                    | 5         | Crassulaceae   | 253              |
| <i>Sedum telephium</i> L.                     | 5         | Crassulaceae   | -                |
| <i>Echinacea purpurea</i> (L.) Moench         | 5         | Asteraceae     | -                |
| <i>Sedum aizoon</i> L.                        | 5         | Crassulaceae   | -                |
| <i>Sporonolus heterolepis</i> (Gray) A.Gray   | 5         | Poaceae        | -                |
| <i>Festuca rubra</i> L.                       | 4         | Poaceae        | 49, 141, 356     |
| <i>Erigeron canadensis</i> L.                 | 4         | Asteraceae     | -                |

|                                                      |   |            |   |
|------------------------------------------------------|---|------------|---|
| <i>Taraxacum campyloides</i><br>G.E.Haglund          | 4 | Asteraceae | - |
| <i>Rudbeckia hirta</i> L.                            | 4 | Asteraceae | - |
| <i>Symphotrichum novae-angliae</i> (L.)<br>G.L.Nesom | 4 | Asteraceae | - |
| <i>Medicago lupulina</i> L.                          | 4 | Fabaceae   | - |

\* = SM2 Reference number

Table S4.2. Selected species most frequently found in publications from dry climate as being adequate for green roof use. For those species recognized as being of full-scale consolidated use, corresponding references in Supplementary Material 2 are indicated in the last column. All names were checked in IPNI.

| Species name                                          | Frequency | Family        | Full-scale use * |
|-------------------------------------------------------|-----------|---------------|------------------|
| <i>Sedum rupestre</i> L.                              | 12        | Crassulaceae  | 110, 253, 304    |
| <i>Sedum acre</i> L.                                  | 10        | Crassulaceae  | 50, 204, 380     |
| <i>Sedum album</i> L.                                 | 7         | Crassulaceae  | 50, 110, 204     |
| <i>Sedum spurium</i> M.Bieb.                          | 6         | Crassulaceae  | 13, 204, 253     |
| <i>Phyla nodiflora</i> (L.) Greene                    | 5         | Verbenaceae   | -                |
| <i>Delosperma cooperi</i> (Hook.f.)<br>L.Bolus        | 4         | Aizoaceae     | -                |
| <i>Sedum lineare</i> Thunb.                           | 3         | Crassulaceae  | 196, 402, 420    |
| <i>Portulaca grandiflora</i> Hook.                    | 3         | Portulacaceae | 50, 109          |
| <i>Ophiopogon japonicus</i> (Thunb.) Ker<br>Gawl.     | 3         | Asparagaceae  | -                |
| <i>Mesembryanthemum cordifolium</i> L.f.              | 3         | Aizoaceae     | -                |
| <i>Chondrosium gracile</i> Kunth.                     | 3         | Poaceae       | -                |
| <i>Iris tectorum</i> Maxim.                           | 3         | Iridaceae     | -                |
| <i>Hylotelephium erythrostictum</i> (Miq.)<br>H. Ohba | 3         | Crassulaceae  | -                |
| <i>Delosperma nubigenum</i> (Schltr.)<br>L.Bolus      | 3         | Aizoaceae     | -                |
| <i>Eschscholzia californica</i> Cham.                 | 3         | Papaveraceae  | -                |
| <i>Sporonolus heterolepis</i> (Gray) A.Gray           | 2         | Poaceae       | -                |
| <i>Sedum kamtschaticum</i> Fisch.                     | 2         | Crassulaceae  | 110, 204         |
| <i>Festuca rubra</i> L.                               | 2         | Poaceae       | 49, 141, 356     |
| <i>Talinum calycinum</i> Engelm. in Wisl.             | 2         | Talinaceae    | 356              |
| <i>Sedum hybridum</i> L.                              | 2         | Crassulaceae  | 253              |

|                                                   |   |                |          |
|---------------------------------------------------|---|----------------|----------|
| <i>Allium cernuum</i> Roth                        | 2 | Amaryllidaceae | 356      |
| <i>Lavandula angustifolia</i> Mill.               | 2 | Lamiaceae      | 222, 389 |
| <i>Symphyotrichum laeve</i> (L.) Á.Löve & D.Löve  | 2 | Asteraceae     | -        |
| <i>Lactuca sativa</i> L.                          | 2 | Asteraceae     | -        |
| <i>Sedum spathulifolium</i> Hook.                 | 2 | Crassulaceae   | -        |
| <i>Buchloe dactyloides</i> (Nutt.) Engelm.        | 2 | Poaceae        | -        |
| <i>Chrysocephalum apiculatum</i> (Labill.) Steetz | 2 | Asteraceae     | -        |
| <i>Aquilegia canadensis</i> L.                    | 2 | Ranunculaceae  | -        |
| <i>Lampranthus spectabilis</i> (Haw.) N.E. Br.    | 2 | Aizoaceae      | -        |
| <i>Nussella tenuissima</i> (Trin.) Barkworth      | 2 | Poaceae        | -        |

\* = SM2 Reference number

Table S4.3. Selected species most frequently found in publications from temperate climate as being adequate for green roof use. For those species recognized as being of full-scale consolidated use, corresponding references in Supplementary Material 2 are indicated in the last column. All names were checked in IPNI.

| Species name                       | Frequency | Family          | Full-scale use * |
|------------------------------------|-----------|-----------------|------------------|
| <i>Sedum album</i> L.              | 58        | Crassulaceae    | 50, 110, 204     |
| <i>Sedum acre</i> L.               | 57        | Crassulaceae    | 50, 204, 380     |
| <i>Sedum spurium</i> M.Bieb.       | 51        | Crassulaceae    | 13, 204, 253     |
| <i>Sedum rupestre</i> L.           | 40        | Crassulaceae    | 110, 253, 304    |
| <i>Sedum sexangulare</i> L.        | 31        | Crassulaceae    | 110, 204, 253    |
| <i>Sedum kamtschaticum</i> Fisch.  | 29        | Crassulaceae    | 110, 204         |
| <i>Sedum lineare</i> Thunb.        | 22        | Crassulaceae    | 196, 402, 420    |
| <i>Allium schoenoprasum</i> L.     | 14        | Amaryllidaceae  | 174              |
| <i>Festuca ovina</i> L.            | 14        | Poaceae         | 204, 205, 367    |
| <i>Festuca rubra</i> L.            | 14        | Poaceae         | 49, 141, 356     |
| <i>Achillea millefolium</i> L.     | 13        | Asteraceae      | 49, 70, 204      |
| <i>Sedum mexicanum</i> Britton     | 13        | Crassulaceae    | 50, 109          |
| <i>Dianthus carthusianorum</i> L.  | 13        | Caryophyllaceae | 90, 163, 367     |
| <i>Trifolium arvense</i> L.        | 12        | Fabaceae        | 367              |
| <i>Trifolium repens</i> L.         | 11        | Fabaceae        | 50, 204, 326     |
| <i>Cynodon dactylon</i> (L.) Pers. | 10        | Poaceae         | 196              |
| <i>Solidago bicolor</i> L.         | 10        | Asteraceae      | 141              |

|                                                |   |                |             |
|------------------------------------------------|---|----------------|-------------|
| <i>Talinum calycinum</i> Engelm. in Wisl.      | 9 | Talinaceae     | 356         |
| <i>Poa pratensis</i> L.                        | 9 | Poaceae        | 196, 422    |
| <i>Lavandula angustifolia</i> Mill.            | 9 | Lamiaceae      | 222, 389    |
| <i>Taraxacum campylodes</i> G.E.Haglund        | 9 | Asteraceae     | -           |
| <i>Rosmarinus officinalis</i> L.               | 9 | Lamiaceae      | -           |
| <i>Danthonia spicata</i> (L.) Roem. & Schult.  | 9 | Poaceae        | -           |
| <i>Ophiopogon japonicus</i> (Thunb.) Ker Gawl. | 8 | Asparagaceae   | -           |
| <i>Erigeron canadensis</i> L.                  | 8 | Asteraceae     | -           |
| <i>Armeria maritima</i> (Mill.) Willd.         | 8 | Plumbaginaceae | 49, 70, 356 |
| <i>Pilosella officinarum</i> Vaill.            | 8 | Asteraceae     | -           |
| <i>Leucanthemum vulgare</i> (Vaill.) Lam.      | 8 | Asteraceae     | -           |
| <i>Sedum hybridum</i> L.                       | 7 | Crassulaceae   | 253         |
| <i>Sedum hispanicum</i> L.                     | 7 | Crassulaceae   | 253         |

\* = SM2 Reference number

Table S4.4. Selected species most frequently found in publications from tropical climate as being adequate for green roof use. For those species recognized as being of full-scale consolidated use, corresponding references in Supplementary Material 2 are indicated in the last column. All names were checked in IPNI.

| Species name                               | Frequency | Family        | Full-scale use * |
|--------------------------------------------|-----------|---------------|------------------|
| <i>Sedum lineare</i> Thunb.                | 16        | Crassulaceae  | 196, 402, 420    |
| <i>Portulaca grandiflora</i> Hook.         | 9         | Portulacaceae | 50, 109          |
| <i>Sedum spurium</i> M.Bieb.               | 7         | Crassulaceae  | 13, 204, 253     |
| <i>Sedum rupestre</i> L.                   | 5         | Crassulaceae  | 110, 253, 304    |
| <i>Sedum kamtschaticum</i> Fisch.          | 5         | Crassulaceae  | 110, 204         |
| <i>Sedum mexicanum</i> Britton             | 5         | Crassulaceae  | 50, 109          |
| <i>Talinum calycinum</i> Engelm. in Wisl.  | 5         | Talinaceae    | 356              |
| <i>Sansevieria trifasciata</i> Prain       | 5         | Asparagaceae  | -                |
| <i>Lactuca sativa</i> L.                   | 5         | Asteraceae    | -                |
| <i>Phedimus aizoon</i> (L.) 't Hart        | 5         | Crassulaceae  | -                |
| <i>Sphagneticola trilobata</i> (L.) Pruski | 5         | Asteraceae    | -                |
| <i>Axonopus compressus</i> (Sw.) P.Beauv.  | 5         | Poaceae       | -                |
| <i>Arachis pintoi</i> Krapov. & W.C.Greg.  | 5         | Fabaceae      | -                |
| <i>Zoysia matrella</i> (L.) Merr.          | 4         | Poaceae       | 359              |
| <i>Callisia repens</i> (Jacq.) L.          | 3         | Commelinaceae | -                |

|                                                         |   |                  |               |
|---------------------------------------------------------|---|------------------|---------------|
| <i>Bulbine frutescens</i> (L.) Willd.                   | 3 | Xanthorrhoeaceae | -             |
| <i>Callirhoe involucrata</i> (Torr. & A.Gray)<br>A.Gray | 3 | Malvaceae        | -             |
| <i>Tradescatia spathacea</i> Sw.                        | 3 | Commelinaceae    | -             |
| <i>Duranta erecta</i> L.                                | 3 | Verbenaceae      | -             |
| <i>Scaevola tacada</i> (Gaertn.) Roxb.                  | 3 | Goodeniaceae     | -             |
| <i>Schefflera arboricola</i> (Hayata) Merr.             | 3 | Araliaceae       | -             |
| <i>Ipomoea pes-caprae</i> (L.) R. Br.                   | 3 | Convolvulaceae   | -             |
| <i>Portulacaria afra</i> Jacq.                          | 3 | Didiereaceae     | -             |
| <i>Sedum acre</i> L.                                    | 2 | Crassulaceae     | 50, 204, 380  |
| <i>Sedum sexangulare</i> L.                             | 2 | Crassulaceae     | 110, 204, 253 |
| <i>Allium schoenoprasum</i> L.                          | 2 | Amaryllidaceae   | 174           |
| <i>Armeria maritima</i> (Mill.) Willd.                  | 2 | Plumbaginaceae   | 49, 70, 356   |
| <i>Portulaca oleracea</i> L.                            | 2 | Portulacaceae    | -             |
| <i>Delosperma cooperi</i> (Hook.f.) L.Bolus             | 2 | Aizoaceae        | -             |
| <i>Symphyotricum laeve</i> (L.) Á.Löve &<br>D.Löve      | 2 | Asteraceae       | -             |

\* = SM2 Reference number
