# Supplementary material for: Life at the Top: Extensive Green Roof Plant Species and Their Traits for Urban Use
Source: MDPI journal article supplement (doi:10.3390/plants14050735), 2025-02-27
Supplement: s1 [file s1]

## Supplementary Material S5

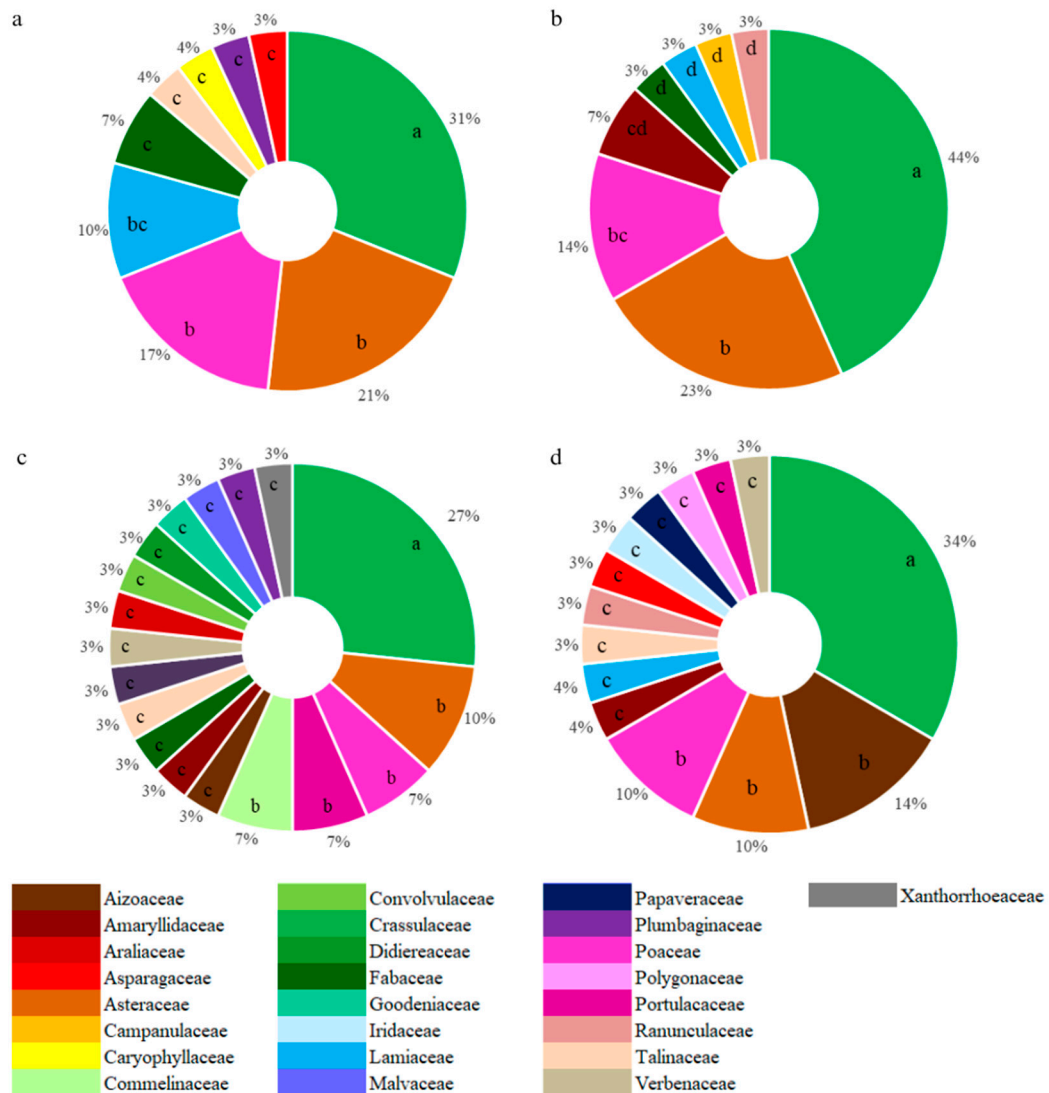

Top mentioned green roof botanical families in each climate: (a) temperate, (b) continental, (c) tropical, and (d) dry. Sections not sharing a letter within each climate are significantly different ( $p \leq 0.05$ ).
